# Supplementary material
Source: MDPI journal article supplement (https://www.mdpi.com/1424-2818/9/3/31)
Supplement: s1 [file s1]

(A) Meacham Cave

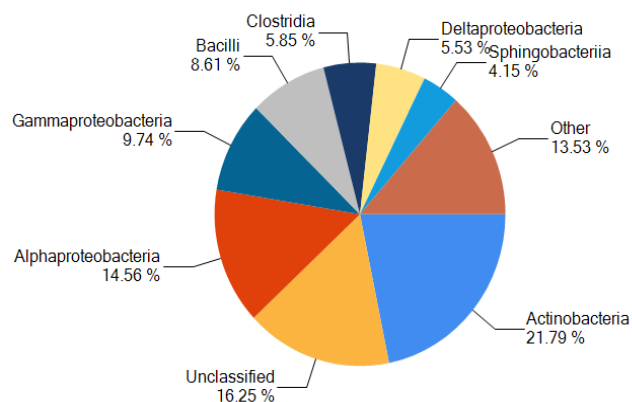

(B) Cave Point Cave

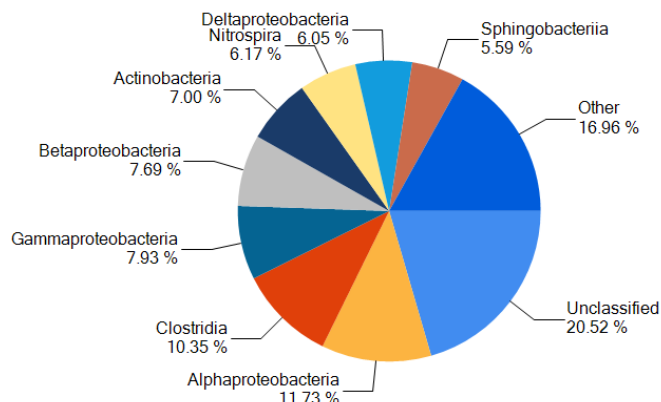

(C) Coon Creek Cave

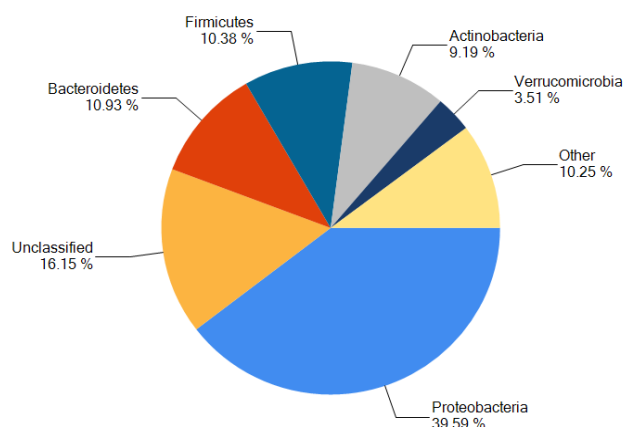

(D) Sandtown Cave

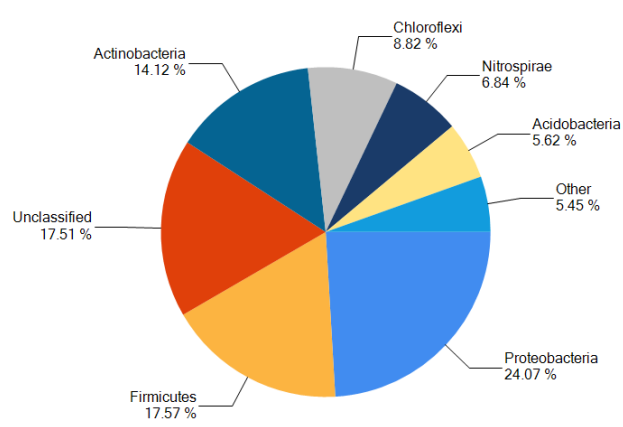

(E) Bell Cave

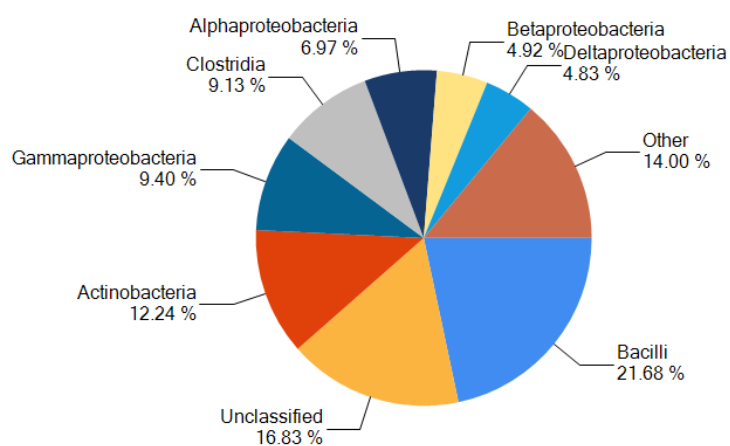

(F) Lawn Soil

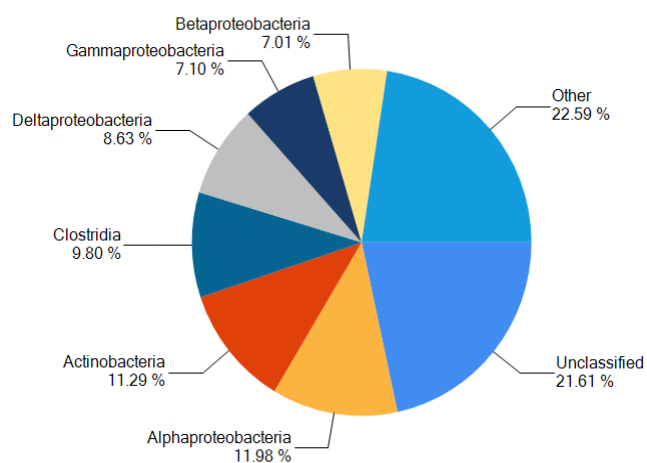

Supplemental Figure 1. Pie chart illustrating the diversity at the Class level for cave and surface soil samples. Number of Classes ranged from 60 to 67. The "Other" category in this pie chart is the sum of all classifications with less than 3.5% abundance.
