# Supplementary material
Source: MDPI journal article supplement (https://www.mdpi.com/1424-2818/9/3/31)
Supplement: s1 [file s1]

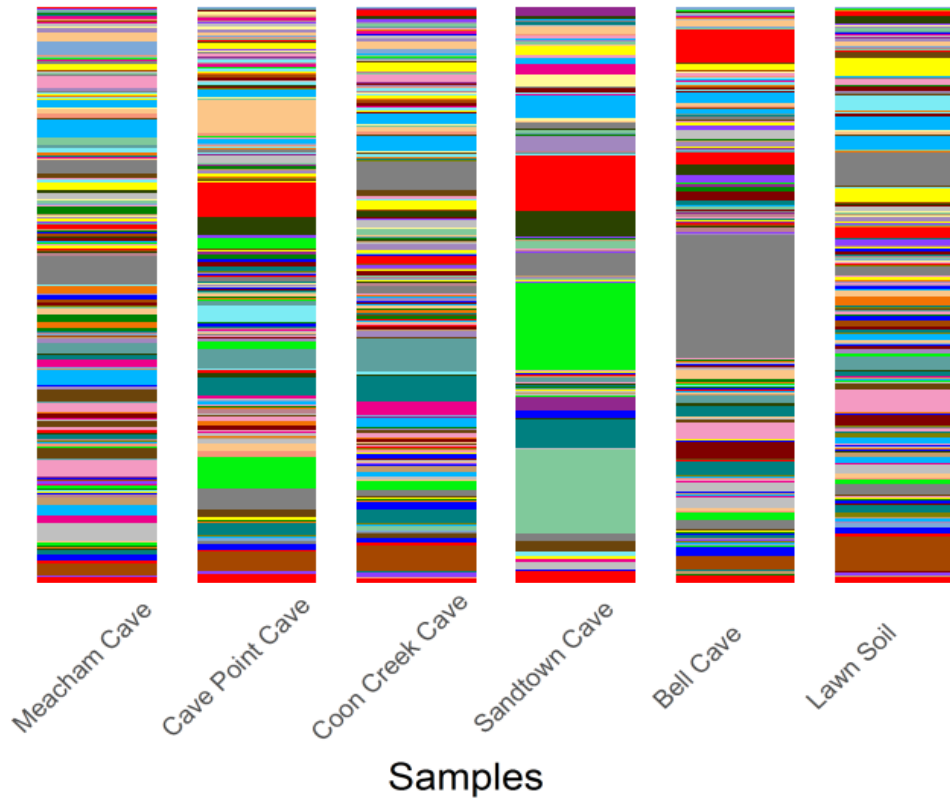

| Legend | Taxonomy                                                                                                             | Total | MGPLP1<br>3 | MGPLP1<br>4 | MGPLP1<br>7 | MGPLP1<br>8 | MGPLP2<br>0 | MGPLP2<br>1 |
|--------|----------------------------------------------------------------------------------------------------------------------|-------|-------------|-------------|-------------|-------------|-------------|-------------|
|        |                                                                                                                      | %     | %           | %           | %           | %           | %           | %           |
|        | Unassigned;Other;Other;Other;Other;Other                                                                             | 1.3%  | 1.0%        | 1.4%        | 0.9%        | 2.2%        | 1.4%        | 1.1%        |
|        | k__Archaea;p__Crenarchaeota;c__MBGA;o__NRP-J;f__g__                                                                  | 0.0%  | 0.0%        | 0.0%        | 0.0%        | 0.0%        | 0.0%        | 0.0%        |
|        | k__Archaea;p__Crenarchaeota;c__MCG;o__pGrfC26;f__g__                                                                 | 0.0%  | 0.0%        | 0.0%        | 0.0%        | 0.0%        | 0.0%        | 0.0%        |
|        | k__Archaea;p__Crenarchaeota;c__Thaumarchaeota;o__AK31;f__g__                                                         | 0.0%  | 0.0%        | 0.0%        | 0.0%        | 0.0%        | 0.0%        | 0.0%        |
|        | k__Archaea;p__Crenarchaeota;c__Thaumarchaeota;o__Cenarchaeales;f__SAGMA-X;g__                                        | 0.0%  | 0.0%        | 0.0%        | 0.0%        | 0.0%        | 0.0%        | 0.0%        |
|        | k__Archaea;p__Crenarchaeota;c__Thaumarchaeota;o__Nitrososphaerales;f__Nitrososphaeraeae;g__Candidatus Nitrososphaera | 0.0%  | 0.0%        | 0.0%        | 0.0%        | 0.0%        | 0.0%        | 0.0%        |
|        | k__Archaea;p__Crenarchaeota;c__Thermoprotei;o__f__g__                                                                | 0.0%  | 0.0%        | 0.0%        | 0.0%        | 0.0%        | 0.0%        | 0.0%        |
|        | k__Archaea;p__Euryarchaeota;c__Methanobacteria;o__Methanobacteriales;f__Methanobacteriaceae;g__Methanobacterium      | 0.0%  | 0.0%        | 0.0%        | 0.0%        | 0.0%        | 0.0%        | 0.0%        |
|        | k__Archaea;p__Euryarchaeota;c__Methanomicrobia;o__Methanocellales;f__Methanocellaceae;g__Methanocella                | 0.0%  | 0.0%        | 0.0%        | 0.0%        | 0.0%        | 0.0%        | 0.0%        |
|        | k__Archaea;p__Euryarchaeota;c__Methanomicrobia;o__Methanosarcinales;f__Methanosarcinaceae;g__Methanosarcina          | 0.0%  | 0.0%        | 0.0%        | 0.0%        | 0.0%        | 0.0%        | 0.0%        |
|        | k__Archaea;p__Euryarchaeota;c__Methanomicrobia;o__YC-E6;f__g__                                                       | 0.0%  | 0.0%        | 0.0%        | 0.0%        | 0.0%        | 0.0%        | 0.0%        |
|        | k__Archaea;p__Euryarchaeota;c__Thermoplasmata;o__E2;f__g__                                                           | 0.0%  | 0.0%        | 0.0%        | 0.0%        | 0.0%        | 0.0%        | 0.0%        |
|        | k__Archaea;p__Euryarchaeota;c__Thermoplasmata;o__E2;f__[Methanomassiliococcaceae];g__                                | 0.0%  | 0.0%        | 0.0%        | 0.0%        | 0.2%        | 0.0%        | 0.0%        |
|        | k__Archaea;p__[Parvarchaeota];c__[Micrarchaeae];o__[Micrarchaeales];f__g__                                           | 0.0%  | 0.0%        | 0.0%        | 0.0%        | 0.0%        | 0.0%        | 0.0%        |
|        | k__Archaea;p__[Parvarchaeota];c__[Parvarchaeae];o__WCHD3-30;f__g__                                                   | 0.0%  | 0.0%        | 0.0%        | 0.0%        | 0.0%        | 0.0%        | 0.0%        |
|        | k__Archaea;p__[Parvarchaeota];c__[Parvarchaeae];o__YLA114;f__g__                                                     | 0.0%  | 0.0%        | 0.0%        | 0.0%        | 0.0%        | 0.0%        | 0.0%        |
|        | k__Bacteria;Other;Other;Other;Other;Other                                                                            | 0.0%  | 0.0%        | 0.0%        | 0.0%        | 0.0%        | 0.0%        | 0.0%        |
|        | k__Bacteria;p__c__o__f__g__                                                                                          | 0.0%  | 0.0%        | 0.0%        | 0.0%        | 0.0%        | 0.0%        | 0.0%        |
|        | k__Bacteria;p__AD3;c__ABS-6;o__f__g__                                                                                | 0.2%  | 0.0%        | 0.0%        | 0.1%        | 1.3%        | 0.0%        | 0.0%        |
|        | k__Bacteria;p__AD3;c__JG37-AG-4;o__f__g__                                                                            | 0.1%  | 0.0%        | 0.0%        | 0.0%        | 0.4%        | 0.0%        | 0.0%        |
|        | k__Bacteria;p__Acidobacteria;Other;Other;Other;Other                                                                 | 0.0%  | 0.0%        | 0.0%        | 0.0%        | 0.0%        | 0.0%        | 0.0%        |
|        | k__Bacteria;p__Acidobacteria;c__o__f__g__                                                                            | 0.1%  | 0.0%        | 0.2%        | 0.1%        | 0.0%        | 0.5%        | 0.1%        |
|        | k__Bacteria;p__Acidobacteria;c__AT-s54;o__f__g__                                                                     | 0.0%  | 0.0%        | 0.0%        | 0.0%        | 0.0%        | 0.0%        | 0.0%        |
|        | k__Bacteria;p__Acidobacteria;c__Acidobacteria-5;o__f__g__                                                            | 0.4%  | 0.2%        | 0.3%        | 0.8%        | 0.0%        | 0.2%        | 0.7%        |
|        | k__Bacteria;p__Acidobacteria;c__Acidobacteria-6;Other;Other;Other                                                    | 0.0%  | 0.0%        | 0.0%        | 0.0%        | 0.0%        | 0.0%        | 0.0%        |
|        | k__Bacteria;p__Acidobacteria;c__Acidobacteria-6;o__BPC015;f__g__                                                     | 0.0%  | 0.0%        | 0.0%        | 0.0%        | 0.0%        | 0.0%        | 0.0%        |
|        | k__Bacteria;p__Acidobacteria;c__Acidobacteria-6;o__CCU21;f__g__                                                      | 0.1%  | 0.0%        | 0.1%        | 0.1%        | 0.0%        | 0.1%        | 0.1%        |
|        | k__Bacteria;p__Acidobacteria;c__Acidobacteria-6;o__iii1-15;Other;Other                                               | 0.0%  | 0.0%        | 0.0%        | 0.0%        | 0.0%        | 0.0%        | 0.0%        |
|        | k__Bacteria;p__Acidobacteria;c__Acidobacteria-6;o__iii1-15;f__g__                                                    | 3.1%  | 2.2%        | 3.3%        | 4.5%        | 0.1%        | 2.2%        | 5.9%        |
|        | k__Bacteria;p__Acidobacteria;c__Acidobacteria-6;o__iii1-15;f__RB40;g__                                               | 0.3%  | 0.4%        | 0.4%        | 0.5%        | 0.0%        | 0.1%        | 0.6%        |
|        | k__Bacteria;p__Acidobacteria;c__Acidobacteria-6;o__iii1-15;f__mb2424;g__                                             | 0.9%  | 1.0%        | 1.1%        | 0.7%        | 0.0%        | 1.5%        | 1.0%        |

|                                                                                                          |      |      |      |      |       |      |      |
|----------------------------------------------------------------------------------------------------------|------|------|------|------|-------|------|------|
| k_Bacteria;p_Acidobacteria;c_Acidobacteriia;o_Acidobacteriales;Other;Other                               | 0.0% | 0.0% | 0.0% | 0.0% | 0.0%  | 0.0% | 0.0% |
| k_Bacteria;p_Acidobacteria;c_Acidobacteriia;o_Acidobacteriales;f_g                                       | 0.0% | 0.0% | 0.0% | 0.0% | 0.0%  | 0.0% | 0.0% |
| k_Bacteria;p_Acidobacteria;c_Acidobacteriia;o_Acidobacteriales;f_Acidobacteriaceae;Other                 | 0.0% | 0.0% | 0.0% | 0.0% | 0.0%  | 0.0% | 0.0% |
| k_Bacteria;p_Acidobacteria;c_Acidobacteriia;o_Acidobacteriales;f_Acidobacteriaceae;g                     | 0.1% | 0.0% | 0.0% | 0.1% | 0.6%  | 0.0% | 0.0% |
| k_Bacteria;p_Acidobacteria;c_Acidobacteriia;o_Acidobacteriales;f_Acidobacteriaceae;g_Edaphobacter        | 0.1% | 0.0% | 0.0% | 0.0% | 0.7%  | 0.0% | 0.0% |
| k_Bacteria;p_Acidobacteria;c_Acidobacteriia;o_Acidobacteriales;f_Acidobacteriaceae;g_Terriglobus         | 0.0% | 0.0% | 0.0% | 0.0% | 0.0%  | 0.0% | 0.0% |
| k_Bacteria;p_Acidobacteria;c_Acidobacteriia;o_Acidobacteriales;f_Koribacteraceae;Other                   | 0.0% | 0.0% | 0.0% | 0.0% | 0.0%  | 0.0% | 0.0% |
| k_Bacteria;p_Acidobacteria;c_Acidobacteriia;o_Acidobacteriales;f_Koribacteraceae;g                       | 0.5% | 0.0% | 0.1% | 0.7% | 1.9%  | 0.1% | 0.0% |
| k_Bacteria;p_Acidobacteria;c_Acidobacteriia;o_Acidobacteriales;f_Koribacteraceae;g_Candidatus Koribacter | 0.4% | 0.0% | 0.4% | 0.4% | 1.3%  | 0.0% | 0.1% |
| k_Bacteria;p_Acidobacteria;c_BPC102;o_f_g                                                                | 0.0% | 0.0% | 0.0% | 0.0% | 0.0%  | 0.0% | 0.0% |
| k_Bacteria;p_Acidobacteria;c_BPC102;o_B110;f_g                                                           | 0.0% | 0.0% | 0.0% | 0.0% | 0.0%  | 0.0% | 0.0% |
| k_Bacteria;p_Acidobacteria;c_BPC102;o_MVS-40;f_g                                                         | 0.3% | 0.0% | 0.4% | 0.0% | 0.0%  | 0.3% | 0.8% |
| k_Bacteria;p_Acidobacteria;c_DA052;o_E29;f_g                                                             | 0.0% | 0.0% | 0.0% | 0.0% | 0.0%  | 0.0% | 0.0% |
| k_Bacteria;p_Acidobacteria;c_DA052;o_Ellin6513;f_g                                                       | 2.6% | 0.0% | 0.0% | 0.9% | 14.5% | 0.0% | 0.0% |
| k_Bacteria;p_Acidobacteria;c_EC1113;o_f_g                                                                | 0.0% | 0.0% | 0.1% | 0.0% | 0.0%  | 0.0% | 0.0% |
| k_Bacteria;p_Acidobacteria;c_GAL08;o_f_g                                                                 | 0.0% | 0.0% | 0.0% | 0.0% | 0.0%  | 0.0% | 0.0% |
| k_Bacteria;p_Acidobacteria;c_Holophagae;o_Holophagales;f_Holophagaceae;g                                 | 0.0% | 0.0% | 0.0% | 0.0% | 0.2%  | 0.0% | 0.0% |
| k_Bacteria;p_Acidobacteria;c_Holophagae;o_Holophagales;f_Holophagaceae;g_Geothrix                        | 0.0% | 0.0% | 0.0% | 0.0% | 0.0%  | 0.0% | 0.0% |
| k_Bacteria;p_Acidobacteria;c_PAUC37;o_f_g                                                                | 0.2% | 0.0% | 0.2% | 0.2% | 0.0%  | 0.2% | 0.7% |
| k_Bacteria;p_Acidobacteria;c_RB25;o_f_g                                                                  | 0.1% | 0.0% | 0.1% | 0.2% | 0.0%  | 0.1% | 0.2% |
| k_Bacteria;p_Acidobacteria;c_S035;o_f_g                                                                  | 0.3% | 0.0% | 0.2% | 0.2% | 0.0%  | 0.3% | 1.0% |
| k_Bacteria;p_Acidobacteria;c_Solibacteres;o_JH-WHS99;f_g                                                 | 0.1% | 0.0% | 0.1% | 0.0% | 0.2%  | 0.1% | 0.0% |
| k_Bacteria;p_Acidobacteria;c_Solibacteres;o_Solibacterales;Other;Other                                   | 0.0% | 0.0% | 0.0% | 0.0% | 0.0%  | 0.2% | 0.0% |
| k_Bacteria;p_Acidobacteria;c_Solibacteres;o_Solibacterales;f_g                                           | 1.9% | 0.8% | 1.9% | 2.2% | 4.8%  | 0.6% | 1.3% |
| k_Bacteria;p_Acidobacteria;c_Solibacteres;o_Solibacterales;f_AKIW659;g                                   | 0.0% | 0.0% | 0.0% | 0.0% | 0.0%  | 0.0% | 0.0% |
| k_Bacteria;p_Acidobacteria;c_Solibacteres;o_Solibacterales;f_PAUC26f;g                                   | 0.1% | 0.1% | 0.0% | 0.1% | 0.2%  | 0.1% | 0.0% |
| k_Bacteria;p_Acidobacteria;c_Solibacteres;o_Solibacterales;f_PK34;g                                      | 0.0% | 0.0% | 0.0% | 0.0% | 0.0%  | 0.0% | 0.0% |
| k_Bacteria;p_Acidobacteria;c_Solibacteres;o_Solibacterales;f_Solibacteraceae;g                           | 0.0% | 0.0% | 0.0% | 0.1% | 0.0%  | 0.0% | 0.0% |
| k_Bacteria;p_Acidobacteria;c_Solibacteres;o_Solibacterales;f_Solibacteraceae;g_Candidatus Solibacter     | 0.6% | 0.1% | 0.1% | 1.3% | 1.5%  | 0.2% | 0.6% |
| k_Bacteria;p_Acidobacteria;c_Solibacteres;o_Solibacterales;f_Bryobacteraceae;g                           | 0.1% | 0.1% | 0.3% | 0.2% | 0.0%  | 0.0% | 0.0% |
| k_Bacteria;p_Acidobacteria;c_Sva0725;o_Sva0725;f_g                                                       | 0.2% | 0.3% | 0.1% | 0.1% | 0.0%  | 0.1% | 0.3% |
| k_Bacteria;p_Acidobacteria;c_TM1;o_f_g                                                                   | 0.4% | 0.0% | 0.0% | 0.0% | 2.3%  | 0.0% | 0.0% |
| k_Bacteria;p_Acidobacteria;c_[Chloracidobacteria];o_f_g                                                  | 0.0% | 0.0% | 0.0% | 0.0% | 0.0%  | 0.0% | 0.0% |
| k_Bacteria;p_Acidobacteria;c_[Chloracidobacteria];o_11-24;f_g                                            | 0.2% | 0.0% | 0.5% | 0.2% | 0.0%  | 0.2% | 0.3% |
| k_Bacteria;p_Acidobacteria;c_[Chloracidobacteria];o_DS-100;f_g                                           | 0.0% | 0.0% | 0.0% | 0.0% | 0.0%  | 0.0% | 0.1% |
| k_Bacteria;p_Acidobacteria;c_[Chloracidobacteria];o_Ellin7246;f_g                                        | 0.0% | 0.0% | 0.0% | 0.0% | 0.0%  | 0.0% | 0.0% |
| k_Bacteria;p_Acidobacteria;c_[Chloracidobacteria];o_PK29;f_g                                             | 0.4% | 0.1% | 1.4% | 0.2% | 0.0%  | 0.4% | 0.4% |
| k_Bacteria;p_Acidobacteria;c_[Chloracidobacteria];o_RB41;f_g                                             | 1.4% | 0.1% | 3.5% | 1.3% | 0.0%  | 1.7% | 1.7% |
| k_Bacteria;p_Acidobacteria;c_[Chloracidobacteria];o_RB41;f_Ellin6075;g                                   | 1.6% | 0.5% | 5.5% | 1.4% | 0.2%  | 1.3% | 0.9% |
| k_Bacteria;p_Acidobacteria;c_iii1-8;o_f_g                                                                | 0.0% | 0.0% | 0.0% | 0.0% | 0.0%  | 0.0% | 0.0% |
| k_Bacteria;p_Acidobacteria;c_iii1-8;o_32-20;f_g                                                          | 0.2% | 0.0% | 0.9% | 0.0% | 0.0%  | 0.3% | 0.2% |
| k_Bacteria;p_Acidobacteria;c_iii1-8;o_DS-18;f_g                                                          | 0.5% | 0.2% | 1.3% | 0.2% | 0.0%  | 0.5% | 0.7% |
| k_Bacteria;p_Acidobacteria;c_iii1-8;o_SJA-36;f_g                                                         | 0.0% | 0.0% | 0.0% | 0.0% | 0.0%  | 0.0% | 0.1% |
| k_Bacteria;p_Actinobacteria;Other;Other;Other;Other                                                      | 0.0% | 0.0% | 0.0% | 0.0% | 0.0%  | 0.0% | 0.0% |
| k_Bacteria;p_Actinobacteria;c_Acidimicrobiia;o_Acidimicrobiales;Other;Other                              | 0.0% | 0.0% | 0.0% | 0.0% | 0.0%  | 0.0% | 0.0% |
| k_Bacteria;p_Actinobacteria;c_Acidimicrobiia;o_Acidimicrobiales;f_g                                      | 1.4% | 3.2% | 0.7% | 0.7% | 0.3%  | 1.8% | 1.7% |
| k_Bacteria;p_Actinobacteria;c_Acidimicrobiia;o_Acidimicrobiales;f_AKIW874;g                              | 0.3% | 1.2% | 0.0% | 0.0% | 0.0%  | 0.2% | 0.2% |
| k_Bacteria;p_Actinobacteria;c_Acidimicrobiia;o_Acidimicrobiales;f_C111;g                                 | 0.7% | 1.8% | 0.2% | 0.7% | 0.0%  | 0.3% | 1.1% |
| k_Bacteria;p_Actinobacteria;c_Acidimicrobiia;o_Acidimicrobiales;f_EB1017;g                               | 0.6% | 1.4% | 0.2% | 1.0% | 0.1%  | 0.3% | 0.8% |
| k_Bacteria;p_Actinobacteria;c_Acidimicrobiia;o_Acidimicrobiales;f_Iamiaceae;Other                        | 0.0% | 0.0% | 0.0% | 0.0% | 0.0%  | 0.0% | 0.0% |
| k_Bacteria;p_Actinobacteria;c_Acidimicrobiia;o_Acidimicrobiales;f_Iamiaceae;g                            | 0.0% | 0.0% | 0.0% | 0.0% | 0.0%  | 0.0% | 0.0% |
| k_Bacteria;p_Actinobacteria;c_Acidimicrobiia;o_Acidimicrobiales;f_Iamiaceae;g_Iamia                      | 0.1% | 0.4% | 0.0% | 0.0% | 0.0%  | 0.0% | 0.0% |
| k_Bacteria;p_Actinobacteria;c_Acidimicrobiia;o_Acidimicrobiales;f_Microthrixaceae;g                      | 0.0% | 0.0% | 0.0% | 0.0% | 0.0%  | 0.0% | 0.0% |
| k_Bacteria;p_Actinobacteria;c_Acidimicrobiia;o_Acidimicrobiales;f_TK06;g                                 | 0.0% | 0.0% | 0.0% | 0.0% | 0.0%  | 0.0% | 0.0% |
| k_Bacteria;p_Actinobacteria;c_Acidimicrobiia;o_Acidimicrobiales;f_koll13;g                               | 0.0% | 0.0% | 0.0% | 0.0% | 0.0%  | 0.0% | 0.2% |
| k_Bacteria;p_Actinobacteria;c_Acidimicrobiia;o_Acidimicrobiales;f_ntu14;g                                | 0.0% | 0.0% | 0.0% | 0.0% | 0.0%  | 0.0% | 0.0% |
| k_Bacteria;p_Actinobacteria;c_Actinobacteria;o_Actinomycetales;Other;Other                               | 0.0% | 0.1% | 0.0% | 0.1% | 0.0%  | 0.0% | 0.1% |
| k_Bacteria;p_Actinobacteria;c_Actinobacteria;o_Actinomycetales;f_g                                       | 0.2% | 0.3% | 0.0% | 0.3% | 0.1%  | 0.1% | 0.1% |
| k_Bacteria;p_Actinobacteria;c_Actinobacteria;o_Actinomycetales;f_ACK-M1;g                                | 0.0% | 0.0% | 0.0% | 0.0% | 0.0%  | 0.0% | 0.0% |
| k_Bacteria;p_Actinobacteria;c_Actinobacteria;o_Actinomycetales;f_Actinomycetaceae;g_Actinomycetes        | 0.0% | 0.0% | 0.0% | 0.0% | 0.0%  | 0.0% | 0.0% |
| k_Bacteria;p_Actinobacteria;c_Actinobacteria;o_Actinomycetales;f_Actinospicaceae;g                       | 0.0% | 0.0% | 0.0% | 0.0% | 0.0%  | 0.0% | 0.0% |
| k_Bacteria;p_Actinobacteria;c_Actinobacteria;o_Actinomycetales;f_Actinosynnemataceae;Other               | 0.0% | 0.1% | 0.0% | 0.0% | 0.0%  | 0.0% | 0.0% |
| k_Bacteria;p_Actinobacteria;c_Actinobacteria;o_Actinomycetales;f_Actinosynnemataceae;g                   | 0.0% | 0.3% | 0.0% | 0.0% | 0.0%  | 0.0% | 0.0% |
| k_Bacteria;p_Actinobacteria;c_Actinobacteria;o_Actinomycetales;f_Actinosynnemataceae;g_Kibdelosporangium | 0.0% | 0.0% | 0.0% | 0.0% | 0.0%  | 0.0% | 0.0% |
| k_Bacteria;p_Actinobacteria;c_Actinobacteria;o_Actinomycetales;f_Actinosynnemataceae;g_Lentzea           | 0.0% | 0.0% | 0.0% | 0.0% | 0.0%  | 0.0% | 0.0% |
| k_Bacteria;p_Actinobacteria;c_Actinobacteria;o_Actinomycetales;f_Beutenbergiaceae;Other                  | 0.0% | 0.0% | 0.0% | 0.0% | 0.0%  | 0.0% | 0.0% |
| k_Bacteria;p_Actinobacteria;c_Actinobacteria;o_Actinomycetales;f_Beutenbergiaceae;g_Salana               | 0.0% | 0.0% | 0.0% | 0.0% | 0.0%  | 0.0% | 0.0% |

|                                                                                                         |      |      |      |      |      |      |
|---------------------------------------------------------------------------------------------------------|------|------|------|------|------|------|
| k_Bacteria:p_Actinobacteria;c_Actinobacteria;o_Actinomycetales:f_Bogoriellaceae;g_Georgenia             | 0.0% | 0.0% | 0.0% | 0.0% | 0.0% | 0.0% |
| k_Bacteria:p_Actinobacteria;c_Actinobacteria;o_Actinomycetales:f_Brevibacteriaceae;g_Brevibacterium     | 0.0% | 0.0% | 0.0% | 0.0% | 0.0% | 0.0% |
| k_Bacteria:p_Actinobacteria;c_Actinobacteria;o_Actinomycetales:f_Cellulomonadaceae;Other                | 0.0% | 0.0% | 0.0% | 0.0% | 0.0% | 0.0% |
| k_Bacteria:p_Actinobacteria;c_Actinobacteria;o_Actinomycetales:f_Cellulomonadaceae;g_Cellulomonas       | 0.0% | 0.0% | 0.0% | 0.0% | 0.0% | 0.0% |
| k_Bacteria:p_Actinobacteria;c_Actinobacteria;o_Actinomycetales:f_Cellulomonadaceae;g_Demequina          | 0.0% | 0.0% | 0.0% | 0.0% | 0.0% | 0.0% |
| k_Bacteria:p_Actinobacteria;c_Actinobacteria;o_Actinomycetales:f_Corynebacteriaceae;g_Corynebacterium   | 0.0% | 0.0% | 0.0% | 0.0% | 0.0% | 0.0% |
| k_Bacteria:p_Actinobacteria;c_Actinobacteria;o_Actinomycetales:f_Cryptosporangiaceae;Other              | 0.0% | 0.0% | 0.0% | 0.0% | 0.0% | 0.0% |
| k_Bacteria:p_Actinobacteria;c_Actinobacteria;o_Actinomycetales:f_Cryptosporangiaceae;g_                 | 0.0% | 0.0% | 0.0% | 0.0% | 0.0% | 0.0% |
| k_Bacteria:p_Actinobacteria;c_Actinobacteria;o_Actinomycetales:f_Dermabacteraceae;g_Brachybacterium     | 0.0% | 0.0% | 0.0% | 0.0% | 0.0% | 0.0% |
| k_Bacteria:p_Actinobacteria;c_Actinobacteria;o_Actinomycetales:f_Dermacoccaceae;g_Dermacoccus           | 0.0% | 0.0% | 0.0% | 0.0% | 0.0% | 0.0% |
| k_Bacteria:p_Actinobacteria;c_Actinobacteria;o_Actinomycetales:f_Dietziaceae;g_Dietzia                  | 0.0% | 0.0% | 0.0% | 0.0% | 0.0% | 0.0% |
| k_Bacteria:p_Actinobacteria;c_Actinobacteria;o_Actinomycetales:f_Frankiaceae;Other                      | 0.0% | 0.0% | 0.0% | 0.0% | 0.0% | 0.0% |
| k_Bacteria:p_Actinobacteria;c_Actinobacteria;o_Actinomycetales:f_Frankiaceae;g_                         | 0.0% | 0.0% | 0.0% | 0.0% | 0.0% | 0.0% |
| k_Bacteria:p_Actinobacteria;c_Actinobacteria;o_Actinomycetales:f_Frankiaceae;g_Frankia                  | 0.0% | 0.0% | 0.0% | 0.0% | 0.0% | 0.0% |
| k_Bacteria:p_Actinobacteria;c_Actinobacteria;o_Actinomycetales:f_Geodermatophilaceae;Other              | 0.0% | 0.0% | 0.0% | 0.0% | 0.0% | 0.0% |
| k_Bacteria:p_Actinobacteria;c_Actinobacteria;o_Actinomycetales:f_Geodermatophilaceae;g_                 | 0.0% | 0.0% | 0.0% | 0.0% | 0.0% | 0.0% |
| k_Bacteria:p_Actinobacteria;c_Actinobacteria;o_Actinomycetales:f_Geodermatophilaceae;g_Geodermatophilus | 0.0% | 0.0% | 0.0% | 0.0% | 0.0% | 0.0% |
| k_Bacteria:p_Actinobacteria;c_Actinobacteria;o_Actinomycetales:f_Geodermatophilaceae;g_Modestobacter    | 0.0% | 0.0% | 0.0% | 0.0% | 0.0% | 0.0% |
| k_Bacteria:p_Actinobacteria;c_Actinobacteria;o_Actinomycetales:f_Glycomycetaceae;g_Glycomyces           | 0.0% | 0.0% | 0.0% | 0.0% | 0.0% | 0.0% |
| k_Bacteria:p_Actinobacteria;c_Actinobacteria;o_Actinomycetales:f_Gordoniaceae;g_Gordonia                | 0.0% | 0.0% | 0.0% | 0.0% | 0.0% | 0.0% |
| k_Bacteria:p_Actinobacteria;c_Actinobacteria;o_Actinomycetales:f_Intrasporangiaceae;Other               | 0.1% | 0.0% | 0.0% | 0.0% | 0.0% | 0.1% |
| k_Bacteria:p_Actinobacteria;c_Actinobacteria;o_Actinomycetales:f_Intrasporangiaceae;g_                  | 0.0% | 0.1% | 0.0% | 0.0% | 0.0% | 0.0% |
| k_Bacteria:p_Actinobacteria;c_Actinobacteria;o_Actinomycetales:f_Intrasporangiaceae;g_Knoellia          | 0.0% | 0.0% | 0.0% | 0.0% | 0.0% | 0.0% |
| k_Bacteria:p_Actinobacteria;c_Actinobacteria;o_Actinomycetales:f_Intrasporangiaceae;g_Phycococcus       | 0.0% | 0.0% | 0.0% | 0.0% | 0.0% | 0.0% |
| k_Bacteria:p_Actinobacteria;c_Actinobacteria;o_Actinomycetales:f_Intrasporangiaceae;g_Terracoccus       | 0.0% | 0.0% | 0.0% | 0.0% | 0.0% | 0.0% |
| k_Bacteria:p_Actinobacteria;c_Actinobacteria;o_Actinomycetales:f_Kinemosporiaceae;Other                 | 0.0% | 0.0% | 0.0% | 0.0% | 0.0% | 0.0% |
| k_Bacteria:p_Actinobacteria;c_Actinobacteria;o_Actinomycetales:f_Kinemosporiaceae;g_                    | 0.0% | 0.0% | 0.0% | 0.0% | 0.0% | 0.0% |
| k_Bacteria:p_Actinobacteria;c_Actinobacteria;o_Actinomycetales:f_Microbacteriaceae;Other                | 0.0% | 0.0% | 0.0% | 0.0% | 0.0% | 0.0% |
| k_Bacteria:p_Actinobacteria;c_Actinobacteria;o_Actinomycetales:f_Microbacteriaceae;g_                   | 0.0% | 0.1% | 0.0% | 0.1% | 0.0% | 0.0% |
| k_Bacteria:p_Actinobacteria;c_Actinobacteria;o_Actinomycetales:f_Microbacteriaceae;g_Agromyces          | 0.1% | 0.4% | 0.0% | 0.0% | 0.0% | 0.0% |
| k_Bacteria:p_Actinobacteria;c_Actinobacteria;o_Actinomycetales:f_Microbacteriaceae;g_Cryocola           | 0.0% | 0.0% | 0.0% | 0.0% | 0.0% | 0.0% |
| k_Bacteria:p_Actinobacteria;c_Actinobacteria;o_Actinomycetales:f_Microbacteriaceae;g_Leucobacter        | 0.0% | 0.0% | 0.0% | 0.0% | 0.0% | 0.0% |
| k_Bacteria:p_Actinobacteria;c_Actinobacteria;o_Actinomycetales:f_Microbacteriaceae;g_Microbacterium     | 0.0% | 0.1% | 0.0% | 0.0% | 0.0% | 0.0% |
| k_Bacteria:p_Actinobacteria;c_Actinobacteria;o_Actinomycetales:f_Microbacteriaceae;g_Mycetocola         | 0.0% | 0.0% | 0.0% | 0.0% | 0.0% | 0.0% |
| k_Bacteria:p_Actinobacteria;c_Actinobacteria;o_Actinomycetales:f_Microbacteriaceae;g_Salinibacterium    | 0.0% | 0.0% | 0.0% | 0.0% | 0.0% | 0.0% |
| k_Bacteria:p_Actinobacteria;c_Actinobacteria;o_Actinomycetales:f_Micrococcaceae;Other                   | 0.0% | 0.0% | 0.0% | 0.0% | 0.0% | 0.0% |
| k_Bacteria:p_Actinobacteria;c_Actinobacteria;o_Actinomycetales:f_Micrococcaceae;g_                      | 0.5% | 0.1% | 0.7% | 0.3% | 0.1% | 1.6% |
| k_Bacteria:p_Actinobacteria;c_Actinobacteria;o_Actinomycetales:f_Micrococcaceae;g_Arthrobacter          | 0.1% | 0.0% | 0.1% | 0.1% | 0.0% | 0.1% |
| k_Bacteria:p_Actinobacteria;c_Actinobacteria;o_Actinomycetales:f_Micrococcaceae;g_Microbispora          | 0.0% | 0.0% | 0.0% | 0.0% | 0.0% | 0.0% |
| k_Bacteria:p_Actinobacteria;c_Actinobacteria;o_Actinomycetales:f_Micrococcaceae;g_Micrococcus           | 0.0% | 0.0% | 0.0% | 0.0% | 0.0% | 0.0% |
| k_Bacteria:p_Actinobacteria;c_Actinobacteria;o_Actinomycetales:f_Micromonosporaceae;Other               | 0.0% | 0.2% | 0.0% | 0.0% | 0.0% | 0.0% |
| k_Bacteria:p_Actinobacteria;c_Actinobacteria;o_Actinomycetales:f_Micromonosporaceae;g_                  | 0.1% | 0.3% | 0.0% | 0.1% | 0.0% | 0.1% |
| k_Bacteria:p_Actinobacteria;c_Actinobacteria;o_Actinomycetales:f_Micromonosporaceae;g_Actinoplanes      | 0.0% | 0.0% | 0.0% | 0.0% | 0.0% | 0.0% |
| k_Bacteria:p_Actinobacteria;c_Actinobacteria;o_Actinomycetales:f_Micromonosporaceae;g_Catellatospora    | 0.0% | 0.1% | 0.0% | 0.0% | 0.0% | 0.0% |
| k_Bacteria:p_Actinobacteria;c_Actinobacteria;o_Actinomycetales:f_Micromonosporaceae;g_Dactylosporangium | 0.0% | 0.0% | 0.0% | 0.0% | 0.0% | 0.0% |
| k_Bacteria:p_Actinobacteria;c_Actinobacteria;o_Actinomycetales:f_Micromonosporaceae;g_Micromonospora    | 0.0% | 0.0% | 0.0% | 0.0% | 0.0% | 0.0% |
| k_Bacteria:p_Actinobacteria;c_Actinobacteria;o_Actinomycetales:f_Micromonosporaceae;g_Pilimelia         | 0.0% | 0.1% | 0.0% | 0.1% | 0.0% | 0    |

|                                                                                                              |      |      |      |      |      |      |      |
|--------------------------------------------------------------------------------------------------------------|------|------|------|------|------|------|------|
| k_Bacteria;p_Actinobacteria;c_Actinobacteria;o_Actinomycetales:f_Propionibacteriaceae;g_                     | 0.3% | 0.2% | 0.1% | 0.1% | 0.0% | 0.4% | 0.8% |
| k_Bacteria;p_Actinobacteria;c_Actinobacteria;o_Actinomycetales:f_Propionibacteriaceae;g_Luteococcus          | 0.0% | 0.0% | 0.0% | 0.0% | 0.0% | 0.0% | 0.0% |
| k_Bacteria;p_Actinobacteria;c_Actinobacteria;o_Actinomycetales:f_Propionibacteriaceae;g_Microlunatus         | 0.3% | 0.2% | 0.0% | 0.2% | 0.0% | 0.1% | 1.0% |
| k_Bacteria;p_Actinobacteria;c_Actinobacteria;o_Actinomycetales:f_Propionibacteriaceae;g_Propionibacterium    | 0.0% | 0.0% | 0.0% | 0.0% | 0.0% | 0.0% | 0.0% |
| k_Bacteria;p_Actinobacteria;c_Actinobacteria;o_Actinomycetales:f_Pseudonocardiaceae;Other                    | 0.0% | 0.1% | 0.0% | 0.0% | 0.0% | 0.0% | 0.0% |
| k_Bacteria;p_Actinobacteria;c_Actinobacteria;o_Actinomycetales:f_Pseudonocardiaceae;g_                       | 0.6% | 1.0% | 0.0% | 0.0% | 0.0% | 2.6% | 0.1% |
| k_Bacteria;p_Actinobacteria;c_Actinobacteria;o_Actinomycetales:f_Pseudonocardiaceae;g_Actinomycetospora      | 0.0% | 0.0% | 0.0% | 0.0% | 0.0% | 0.0% | 0.0% |
| k_Bacteria;p_Actinobacteria;c_Actinobacteria;o_Actinomycetales:f_Pseudonocardiaceae;g_Amycolatopsis          | 0.0% | 0.1% | 0.0% | 0.0% | 0.0% | 0.0% | 0.0% |
| k_Bacteria;p_Actinobacteria;c_Actinobacteria;o_Actinomycetales:f_Pseudonocardiaceae;g_Jiangella              | 0.0% | 0.0% | 0.0% | 0.0% | 0.0% | 0.0% | 0.0% |
| k_Bacteria;p_Actinobacteria;c_Actinobacteria;o_Actinomycetales:f_Pseudonocardiaceae;g_Pseudonocardia         | 0.1% | 0.5% | 0.0% | 0.1% | 0.0% | 0.1% | 0.1% |
| k_Bacteria;p_Actinobacteria;c_Actinobacteria;o_Actinomycetales:f_Pseudonocardiaceae;g_Saccharopolyspora      | 0.0% | 0.0% | 0.0% | 0.0% | 0.0% | 0.0% | 0.0% |
| k_Bacteria;p_Actinobacteria;c_Actinobacteria;o_Actinomycetales:f_Pseudonocardiaceae;g_Thermobispora          | 0.0% | 0.0% | 0.0% | 0.0% | 0.0% | 0.0% | 0.0% |
| k_Bacteria;p_Actinobacteria;c_Actinobacteria;o_Actinomycetales:f_Sanguibacteraceae;g_Sanguibacter            | 0.0% | 0.0% | 0.0% | 0.0% | 0.0% | 0.0% | 0.0% |
| k_Bacteria;p_Actinobacteria;c_Actinobacteria;o_Actinomycetales:f_Sporichthyaceae;g_                          | 0.0% | 0.0% | 0.0% | 0.0% | 0.0% | 0.0% | 0.0% |
| k_Bacteria;p_Actinobacteria;c_Actinobacteria;o_Actinomycetales:f_Sporichthyaceae;g_Sporichthya               | 0.0% | 0.0% | 0.0% | 0.0% | 0.0% | 0.0% | 0.0% |
| k_Bacteria;p_Actinobacteria;c_Actinobacteria;o_Actinomycetales:f_Streptomycetaceae;Other                     | 0.0% | 0.0% | 0.0% | 0.0% | 0.0% | 0.0% | 0.0% |
| k_Bacteria;p_Actinobacteria;c_Actinobacteria;o_Actinomycetales:f_Streptomycetaceae;g_                        | 0.2% | 0.4% | 0.0% | 0.4% | 0.0% | 0.1% | 0.4% |
| k_Bacteria;p_Actinobacteria;c_Actinobacteria;o_Actinomycetales:f_Streptomycetaceae;g_Streptacidiphilus       | 0.0% | 0.0% | 0.0% | 0.0% | 0.1% | 0.0% | 0.0% |
| k_Bacteria;p_Actinobacteria;c_Actinobacteria;o_Actinomycetales:f_Streptomycetaceae;g_Streptomyces            | 0.3% | 1.1% | 0.0% | 0.2% | 0.0% | 0.1% | 0.2% |
| k_Bacteria;p_Actinobacteria;c_Actinobacteria;o_Actinomycetales:f_Streptosporangiaceae;Other                  | 0.0% | 0.0% | 0.0% | 0.0% | 0.0% | 0.0% | 0.0% |
| k_Bacteria;p_Actinobacteria;c_Actinobacteria;o_Actinomycetales:f_Streptosporangiaceae;g_                     | 0.0% | 0.0% | 0.0% | 0.1% | 0.0% | 0.0% | 0.0% |
| k_Bacteria;p_Actinobacteria;c_Actinobacteria;o_Actinomycetales:f_Streptosporangiaceae;g_Nonumurea            | 0.0% | 0.0% | 0.0% | 0.0% | 0.0% | 0.0% | 0.0% |
| k_Bacteria;p_Actinobacteria;c_Actinobacteria;o_Actinomycetales:f_Streptosporangiaceae;g_Sphaerisporangium    | 0.0% | 0.0% | 0.0% | 0.0% | 0.0% | 0.0% | 0.0% |
| k_Bacteria;p_Actinobacteria;c_Actinobacteria;o_Actinomycetales:f_Streptosporangiaceae;g_Streptosporangium    | 0.0% | 0.0% | 0.0% | 0.1% | 0.0% | 0.0% | 0.0% |
| k_Bacteria;p_Actinobacteria;c_Actinobacteria;o_Actinomycetales:f_Thermomonosporaceae;Other                   | 0.0% | 0.0% | 0.0% | 0.0% | 0.0% | 0.0% | 0.0% |
| k_Bacteria;p_Actinobacteria;c_Actinobacteria;o_Actinomycetales:f_Thermomonosporaceae;g_                      | 0.0% | 0.0% | 0.0% | 0.0% | 0.0% | 0.0% | 0.0% |
| k_Bacteria;p_Actinobacteria;c_Actinobacteria;o_Actinomycetales:f_Thermomonosporaceae;g_Actinoallomurus       | 0.0% | 0.0% | 0.0% | 0.0% | 0.0% | 0.0% | 0.0% |
| k_Bacteria;p_Actinobacteria;c_Actinobacteria;o_Actinomycetales:f_Thermomonosporaceae;g_Actinocorallia        | 0.0% | 0.0% | 0.0% | 0.0% | 0.0% | 0.0% | 0.0% |
| k_Bacteria;p_Actinobacteria;c_Actinobacteria;o_Actinomycetales:f_Thermomonosporaceae;g_Actinomadura          | 0.1% | 0.3% | 0.0% | 0.0% | 0.0% | 0.0% | 0.0% |
| k_Bacteria;p_Actinobacteria;c_Actinobacteria;o_Actinomycetales:f_Williamsiaceae;g_Williamsia                 | 0.0% | 0.0% | 0.0% | 0.0% | 0.0% | 0.0% | 0.0% |
| k_Bacteria;p_Actinobacteria;c_Actinobacteria;o_Bifidobacteriales:f_;g_                                       | 0.0% | 0.0% | 0.0% | 0.0% | 0.0% | 0.0% | 0.0% |
| k_Bacteria;p_Actinobacteria;c_Actinobacteria;o_Micrococcales:f_;g_                                           | 0.1% | 0.1% | 0.0% | 0.0% | 0.0% | 0.1% | 0.2% |
| k_Bacteria;p_Actinobacteria;c_Actinobacteria;o_WCHB1-81;f_At425_EubF1;g_                                     | 0.0% | 0.0% | 0.0% | 0.0% | 0.0% | 0.0% | 0.0% |
| k_Bacteria;p_Actinobacteria;c_Coriobacteriia;o_Coriobacteriales:f_Coriobacteriaceae;g_Adlercreutzia          | 0.0% | 0.0% | 0.0% | 0.0% | 0.0% | 0.0% | 0.0% |
| k_Bacteria;p_Actinobacteria;c_KIST-JY010;o_;f_;g_                                                            | 0.0% | 0.0% | 0.0% | 0.0% | 0.0% | 0.0% | 0.0% |
| k_Bacteria;p_Actinobacteria;c_MB-A2-108;o_;f_;g_                                                             | 0.0% | 0.0% | 0.0% | 0.0% | 0.0% | 0.0% | 0.0% |
| k_Bacteria;p_Actinobacteria;c_MB-A2-108;o_0319-7L14;f_;g_                                                    | 1.1% | 0.7% | 0.6% | 0.6% | 0.0% | 2.8% | 1.7% |
| k_Bacteria;p_Actinobacteria;c_Nitriliruptoria;o_Euzebyales;f_Euzebyaceae;g_Euzebya                           | 0.0% | 0.0% | 0.0% | 0.0% | 0.0% | 0.1% | 0.0% |
| k_Bacteria;p_Actinobacteria;c_OPB41;o_;f_;g_                                                                 | 0.0% | 0.0% | 0.0% | 0.0% | 0.0% | 0.0% | 0.1% |
| k_Bacteria;p_Actinobacteria;c_Rubrobacteria;o_Rubrobacterales;f_Rubrobacteraceae;g_                          | 0.1% | 0.1% | 0.0% | 0.0% | 0.0% | 0.1% | 0.2% |
| k_Bacteria;p_Actinobacteria;c_Rubrobacteria;o_Rubrobacterales;f_Rubrobacteraceae;g_Rubrobacter               | 0.2% | 0.1% | 0.8% | 0.0% | 0.0% | 0.2% | 0.2% |
| k_Bacteria;p_Actinobacteria;c_Thermoleophilia;o_;f_;g_                                                       | 0.0% | 0.0% | 0.0% | 0.0% | 0.0% | 0.0% | 0.1% |
| k_Bacteria;p_Actinobacteria;c_Thermoleophilia;o_Gaiellales;Other;Other                                       | 0.0% | 0.0% | 0.0% | 0.0% | 0.0% | 0.0% | 0.0% |
| k_Bacteria;p_Actinobacteria;c_Thermoleophilia;o_Gaiellales;f_;g_                                             | 0.0% | 0.0% | 0.0% | 0.1% | 0.0% | 0.1% | 0.1% |
| k_Bacteria;p_Actinobacteria;c_Thermoleophilia;o_Gaiellales;f_AK1AB1_02E;g_                                   | 0.0% | 0.0% | 0.0% | 0.0% | 0.0% | 0.0% | 0.0% |
| k_Bacteria;p_Actinobacteria;c_Thermoleophilia;o_Gaiellales;f_Gaiellaceae;g_                                  | 1.7% | 1.7% | 0.8% | 0.9% | 0.1% | 2.9% | 3.8% |
| k_Bacteria;p_Actinobacteria;c_Thermoleophilia;o_Solirubrobacterales;Other;Other                              | 0.0% | 0.2% | 0.0% | 0.0% | 0.0% | 0.0% | 0.1% |
| k_Bacteria;p_Actinobacteria;c_Thermoleophilia;o_Solirubrobacterales;f_;g_                                    | 0.7% | 2.1% | 0.1% | 0.5% | 0.0% | 0.5% | 0.9% |
| k_Bacteria;p_Actinobacteria;c_Thermoleophilia;o_Solirubrobacterales;f_Conexibacteraceae;Other                | 0.0% | 0.0% | 0.0% | 0.0% | 0.0% | 0.0% | 0.0% |
| k_Bacteria;p_Actinobacteria;c_Thermoleophilia;o_Solirubrobacterales;f_Conexibacteraceae;g_                   | 0.0% | 0.0% | 0.0% | 0.0% | 0.0% | 0.0% | 0.0% |
| k_Bacteria;p_Actinobacteria;c_Thermoleophilia;o_Solirubrobacterales;f_Conexibacteraceae;g_Conexibacter       | 0.0% | 0.0% | 0.0% | 0.0% | 0.0% | 0.0% | 0.0% |
| k_Bacteria;p_Actinobacteria;c_Thermoleophilia;o_Solirubrobacterales;f_Patulibacteraceae;g_                   | 0.0% | 0.0% | 0.0% | 0.0% | 0.0% | 0.0% | 0.0% |
| k_Bacteria;p_Actinobacteria;c_Thermoleophilia;o_Solirubrobacterales;f_Patulibacteraceae;g_Patulibacter       | 0.0% | 0.0% | 0.0% | 0.0% | 0.0% | 0.0% | 0.0% |
| k_Bacteria;p_Actinobacteria;c_Thermoleophilia;o_Solirubrobacterales;f_Solirubrobacteraceae;Other             | 0.0% | 0.0% | 0.0% | 0.0% | 0.0% | 0.0% | 0.0% |
| k_Bacteria;p_Actinobacteria;c_Thermoleophilia;o_Solirubrobacterales;f_Solirubrobacteraceae;g_                | 0.1% | 0.5% | 0.0% | 0.1% | 0.0% | 0.1% | 0.1% |
| k_Bacteria;p_Actinobacteria;c_Thermoleophilia;o_Solirubrobacterales;f_Solirubrobacteraceae;g_Solirubrobacter | 0.0% | 0.0% | 0.0% | 0.0% | 0.0% | 0.0% | 0.0% |
| k_Bacteria;p_Armatimonadetes;c_0319-6E2;o_;f_;g_                                                             | 0.1% | 0.0% | 0.2% | 0.0% | 0.0% | 0.1% | 0.1% |
| k_Bacteria;p_Armatimonadetes;c_Armatimonadia;o_Armatimonadales;f_Armatimonadaceae;g_                         | 0.0% | 0.0% | 0.0% | 0.0% | 0.0% | 0.0% | 0.0% |
| k_Bacteria;p_Armatimonadetes;c_Armatimonadia;o_Armatimonadales;f_Armatimonadaceae;g_Armatimonas              | 0.0% | 0.0% | 0.0% | 0.0% | 0.0% | 0.0% | 0.0% |
| k_Bacteria;p_Armatimonadetes;c_Armatimonadia;o_FW68;f_;g_                                                    | 0.0% | 0.0% | 0.0% | 0.0% | 0.0% | 0.0% | 0.0% |
| k_Bacteria;p_Armatimonadetes;c_Chthonomonadetes;o_Chthonomonadales;f_Chthonomonadaceae;g_                    | 0.0% | 0.0% | 0.1% | 0.0% | 0.0% | 0.0% | 0.0% |
| k_Bacteria;p_Armatimonadetes;c_Chthonomonadetes;o_Chthonomonadales;f_Chthonomonadaceae;g_Chthonomonas        | 0.0% | 0.0% | 0.0% | 0.0% | 0.0% | 0.0% | 0.0% |
| k_Bacteria;p_Armatimonadetes;c_Chthonomonadetes;o_SJA-22;f_;g_                                               | 0.1% | 0.0% | 0.7% | 0.0% | 0.0% | 0.1% | 0.0% |
| k_Bacteria;p_Armatimonadetes;c_OPB50;o_;f_;g_                                                                | 0.0% | 0.0% | 0.0% | 0.0% | 0.0% | 0.0% | 0.0% |
| k_Bacteria;p_Armatimonadetes;c_OS-L;o_;f_;g_                                                                 | 0.0% | 0.0% | 0.0% | 0.0% | 0.0% | 0.0% | 0.0% |
| k_Bacteria;p_Armatimonadetes;c_SHA-37;o_;f_;g_                                                               | 0.0% | 0.0% | 0.0% | 0.0% | 0.0% | 0.0% | 0.0% |
| k_Bacteria;p_Armatimonadetes;c_SJA-176;o_GAB-B06;f_;g_                                                       | 0.0% | 0.0% | 0.0% | 0.0% | 0.0% | 0.0% | 0.0% |

|                                                                                                             |      |      |      |      |      |      |
|-------------------------------------------------------------------------------------------------------------|------|------|------|------|------|------|
| k_Bacteria;p_Armatimonadetes;c_SJA-176;o_RB046:f_g                                                          | 0.0% | 0.0% | 0.0% | 0.0% | 0.0% | 0.0% |
| k_Bacteria;p_Armatimonadetes;o_Fimbrimonadia;o_Fimbrimonadales:f_g                                          | 0.0% | 0.0% | 0.1% | 0.0% | 0.0% | 0.0% |
| k_Bacteria;p_Armatimonadetes;c_Fimbrimonadia;o_Fimbrimonadales:f_Fimbrimonadales:g                          | 0.1% | 0.0% | 0.3% | 0.0% | 0.0% | 0.0% |
| k_Bacteria;p_Armatimonadetes;c_Fimbrimonadia;o_Fimbrimonadales:f_Fimbrimonadales:g_Fimbrimonas              | 0.1% | 0.0% | 0.3% | 0.1% | 0.0% | 0.0% |
| k_Bacteria;p_BHI80-139;c_o_f_g                                                                              | 0.0% | 0.0% | 0.0% | 0.0% | 0.0% | 0.0% |
| k_Bacteria;p_BRC1;c_NPL-UPA2;o_f_g                                                                          | 0.0% | 0.0% | 0.0% | 0.0% | 0.0% | 0.0% |
| k_Bacteria;p_BRC1;c_PRR-11;o_f_g                                                                            | 0.0% | 0.0% | 0.0% | 0.0% | 0.0% | 0.0% |
| k_Bacteria;p_Bacteroidetes;Other;Other;Other                                                                | 0.0% | 0.0% | 0.1% | 0.0% | 0.0% | 0.0% |
| k_Bacteria;p_Bacteroidetes;c_o_f_g                                                                          | 0.0% | 0.0% | 0.0% | 0.0% | 0.0% | 0.0% |
| k_Bacteria;p_Bacteroidetes;c_At12OctB3;o_f_g                                                                | 0.0% | 0.0% | 0.0% | 0.0% | 0.0% | 0.1% |
| k_Bacteria;p_Bacteroidetes;c_BME43;o_f_g                                                                    | 0.0% | 0.0% | 0.0% | 0.0% | 0.0% | 0.0% |
| k_Bacteria;p_Bacteroidetes;c_Bacteroidia;o_Bacteroidales:f_g                                                | 0.0% | 0.0% | 0.0% | 0.0% | 0.0% | 0.1% |
| k_Bacteria;p_Bacteroidetes;c_Bacteroidia;o_Bacteroidales:f_BA008:g                                          | 0.0% | 0.0% | 0.0% | 0.0% | 0.0% | 0.0% |
| k_Bacteria;p_Bacteroidetes;c_Bacteroidia;o_Bacteroidales:f_Rikenellaceae:g_Blvii28                          | 0.0% | 0.0% | 0.0% | 0.0% | 0.0% | 0.0% |
| k_Bacteria;p_Bacteroidetes;c_Bacteroidia;o_Bacteroidales:f_S24-7:g                                          | 0.0% | 0.0% | 0.0% | 0.0% | 0.0% | 0.0% |
| k_Bacteria;p_Bacteroidetes;c_Cytophagia;o_Cytophagales;Other;Other                                          | 0.0% | 0.0% | 0.0% | 0.0% | 0.0% | 0.0% |
| k_Bacteria;p_Bacteroidetes;c_Cytophagia;o_Cytophagales:f_g                                                  | 0.0% | 0.0% | 0.0% | 0.0% | 0.0% | 0.0% |
| k_Bacteria;p_Bacteroidetes;c_Cytophagia;o_Cytophagales:f_Cyclobacteriaceae;Other                            | 0.0% | 0.0% | 0.0% | 0.0% | 0.0% | 0.0% |
| k_Bacteria;p_Bacteroidetes;c_Cytophagia;o_Cytophagales:f_Cyclobacteriaceae:g                                | 0.0% | 0.0% | 0.0% | 0.0% | 0.0% | 0.0% |
| k_Bacteria;p_Bacteroidetes;c_Cytophagia;o_Cytophagales:f_Cyclobacteriaceae:g_Algoriphagus                   | 0.0% | 0.0% | 0.0% | 0.0% | 0.0% | 0.0% |
| k_Bacteria;p_Bacteroidetes;c_Cytophagia;o_Cytophagales:f_Cytophagaceae:g                                    | 0.8% | 2.7% | 0.5% | 1.4% | 0.0% | 0.3% |
| k_Bacteria;p_Bacteroidetes;c_Cytophagia;o_Cytophagales:f_Cytophagaceae:g_Adhaeribacter                      | 0.1% | 0.1% | 0.1% | 0.1% | 0.0% | 0.1% |
| k_Bacteria;p_Bacteroidetes;c_Cytophagia;o_Cytophagales:f_Cytophagaceae:g_Cytophaga                          | 0.0% | 0.0% | 0.0% | 0.0% | 0.0% | 0.0% |
| k_Bacteria;p_Bacteroidetes;c_Cytophagia;o_Cytophagales:f_Cytophagaceae:g_Dyadobacter                        | 0.0% | 0.0% | 0.0% | 0.0% | 0.0% | 0.0% |
| k_Bacteria;p_Bacteroidetes;c_Cytophagia;o_Cytophagales:f_Cytophagaceae:g_Enticicia                          | 0.0% | 0.0% | 0.0% | 0.0% | 0.0% | 0.0% |
| k_Bacteria;p_Bacteroidetes;c_Cytophagia;o_Cytophagales:f_Cytophagaceae:g_Flectobacillus                     | 0.0% | 0.0% | 0.0% | 0.0% | 0.0% | 0.0% |
| k_Bacteria;p_Bacteroidetes;c_Cytophagia;o_Cytophagales:f_Cytophagaceae:g_Hymenobacter                       | 0.0% | 0.0% | 0.0% | 0.1% | 0.0% | 0.0% |
| k_Bacteria;p_Bacteroidetes;c_Cytophagia;o_Cytophagales:f_Cytophagaceae:g_Larkinella                         | 0.0% | 0.0% | 0.0% | 0.0% | 0.0% | 0.0% |
| k_Bacteria;p_Bacteroidetes;c_Cytophagia;o_Cytophagales:f_Cytophagaceae:g_Leadbetterella                     | 0.0% | 0.0% | 0.0% | 0.0% | 0.0% | 0.0% |
| k_Bacteria;p_Bacteroidetes;c_Cytophagia;o_Cytophagales:f_Cytophagaceae:g_Pontibacter                        | 0.0% | 0.0% | 0.0% | 0.0% | 0.0% | 0.0% |
| k_Bacteria;p_Bacteroidetes;c_Cytophagia;o_Cytophagales:f_Cytophagaceae:g_Rhodocytaphaga                     | 0.0% | 0.0% | 0.0% | 0.0% | 0.0% | 0.0% |
| k_Bacteria;p_Bacteroidetes;c_Cytophagia;o_Cytophagales:f_Cytophagaceae:g_Runella                            | 0.0% | 0.0% | 0.0% | 0.0% | 0.0% | 0.0% |
| k_Bacteria;p_Bacteroidetes;c_Cytophagia;o_Cytophagales:f_Cytophagaceae:g_Spirosoma                          | 0.0% | 0.0% | 0.0% | 0.0% | 0.0% | 0.0% |
| k_Bacteria;p_Bacteroidetes;c_Cytophagia;o_Cytophagales:f_Cytophagaceae:g_Sporocytaphaga                     | 0.1% | 0.1% | 0.0% | 0.2% | 0.0% | 0.0% |
| k_Bacteria;p_Bacteroidetes;c_Cytophagia;o_Cytophagales:f_Flammeovirgaceae:g                                 | 0.0% | 0.0% | 0.0% | 0.0% | 0.0% | 0.0% |
| k_Bacteria;p_Bacteroidetes;c_Cytophagia;o_Cytophagales:f_Flammeovirgaceae:g_Fulvivirga                      | 0.0% | 0.0% | 0.0% | 0.0% | 0.0% | 0.0% |
| k_Bacteria;p_Bacteroidetes;c_Cytophagia;o_Cytophagales:f_Flammeovirgaceae:g_Roseivirga                      | 0.0% | 0.0% | 0.0% | 0.0% | 0.0% | 0.0% |
| k_Bacteria;p_Bacteroidetes;c_Cytophagia;o_Cytophagales:f_Amoebophilaceae:g                                  | 0.0% | 0.0% | 0.0% | 0.0% | 0.0% | 0.0% |
| k_Bacteria;p_Bacteroidetes;c_Cytophagia;o_Cytophagales:f_Amoebophilaceae:g_Candidatus Amoebophilus          | 0.0% | 0.0% | 0.0% | 0.0% | 0.0% | 0.0% |
| k_Bacteria;p_Bacteroidetes;c_Cytophagia;o_Cytophagales:f_Amoebophilaceae:g_SC3-56                           | 0.0% | 0.0% | 0.0% | 0.0% | 0.0% | 0.0% |
| k_Bacteria;p_Bacteroidetes;c_Flavobacteriia;o_Flavobacteriales;Other;Other                                  | 0.0% | 0.0% | 0.0% | 0.0% | 0.0% | 0.0% |
| k_Bacteria;p_Bacteroidetes;c_Flavobacteriia;o_Flavobacteriales:f_g                                          | 0.0% | 0.0% | 0.0% | 0.0% | 0.0% | 0.0% |
| k_Bacteria;p_Bacteroidetes;c_Flavobacteriia;o_Flavobacteriales:f_Cryomorphaceae:g                           | 0.1% | 0.1% | 0.2% | 0.1% | 0.0% | 0.0% |
| k_Bacteria;p_Bacteroidetes;c_Flavobacteriia;o_Flavobacteriales:f_Cryomorphaceae:g_Crocinitomix              | 0.0% | 0.0% | 0.0% | 0.0% | 0.0% | 0.0% |
| k_Bacteria;p_Bacteroidetes;c_Flavobacteriia;o_Flavobacteriales:f_Cryomorphaceae:g_Fluviicola                | 0.0% | 0.0% | 0.1% | 0.0% | 0.0% | 0.0% |
| k_Bacteria;p_Bacteroidetes;c_Flavobacteriia;o_Flavobacteriales:f_Cryomorphaceae:g_Owenweeksia               | 0.0% | 0.0% | 0.0% | 0.0% | 0.0% | 0.0% |
| k_Bacteria;p_Bacteroidetes;c_Flavobacteriia;o_Flavobacteriales:f_Flavobacteriaceae;Other                    | 0.0% | 0.0% | 0.0% | 0.0% | 0.0% | 0.0% |
| k_Bacteria;p_Bacteroidetes;c_Flavobacteriia;o_Flavobacteriales:f_Flavobacteriaceae:g                        | 0.0% | 0.0% | 0.1% | 0.0% | 0.0% | 0.0% |
| k_Bacteria;p_Bacteroidetes;c_Flavobacteriia;o_Flavobacteriales:f_Flavobacteriaceae:g_Flavobacterium         | 0.8% | 1.2% | 0.7% | 2.5% | 0.0% | 0.2% |
| k_Bacteria;p_Bacteroidetes;c_Flavobacteriia;o_Flavobacteriales:f_Flavobacteriaceae:g_Gillisia               | 0.0% | 0.0% | 0.0% | 0.0% | 0.0% | 0.0% |
| k_Bacteria;p_Bacteroidetes;c_Flavobacteriia;o_Flavobacteriales:f_Flavobacteriaceae:g_Myroides               | 0.0% | 0.0% | 0.0% | 0.0% | 0.0% | 0.0% |
| k_Bacteria;p_Bacteroidetes;c_Flavobacteriia;o_Flavobacteriales:f_Weeksellaceae:g_Chryseobacterium           | 0.0% | 0.0% | 0.0% | 0.0% | 0.0% | 0.0% |
| k_Bacteria;p_Bacteroidetes;c_Flavobacteriia;o_Flavobacteriales:f_Weeksellaceae:g_Elizabethkingia            | 0.0% | 0.0% | 0.0% | 0.0% | 0.0% | 0.0% |
| k_Bacteria;p_Bacteroidetes;c_Sphingobacteriia;o_Sphingobacteriales;Other;Other                              | 0.0% | 0.0% | 0.0% | 0.0% | 0.0% | 0.0% |
| k_Bacteria;p_Bacteroidetes;c_Sphingobacteriia;o_Sphingobacteriales:f_g                                      | 1.8% | 0.8% | 3.0% | 4.2% | 0.3% | 0.7% |
| k_Bacteria;p_Bacteroidetes;c_Sphingobacteriia;o_Sphingobacteriales:f_Sphingobacteriaceae;Other              | 0.0% | 0.0% | 0.0% | 0.0% | 0.0% | 0.0% |
| k_Bacteria;p_Bacteroidetes;c_Sphingobacteriia;o_Sphingobacteriales:f_Sphingobacteriaceae:g                  | 0.4% | 0.2% | 0.8% | 0.3% | 0.3% | 0.2% |
| k_Bacteria;p_Bacteroidetes;c_Sphingobacteriia;o_Sphingobacteriales:f_Sphingobacteriaceae:g_Olivibacter      | 0.0% | 0.0% | 0.0% | 0.0% | 0.0% | 0.0% |
| k_Bacteria;p_Bacteroidetes;c_Sphingobacteriia;o_Sphingobacteriales:f_Sphingobacteriaceae:g_Pedobacter       | 0.1% | 0.0% | 0.4% | 0.1% | 0.0% | 0.0% |
| k_Bacteria;p_Bacteroidetes;c_Sphingobacteriia;o_Sphingobacteriales:f_Sphingobacteriaceae:g_Solitalea        | 0.0% | 0.0% | 0.0% | 0.0% | 0.0% | 0.0% |
| k_Bacteria;p_Bacteroidetes;c_Sphingobacteriia;o_Sphingobacteriales:f_Sphingobacteriaceae:g_Sphingobacterium | 0.0% | 0.0% | 0.0% | 0.0% | 0.0% | 0.0% |
| k_Bacteria;p_Bacteroidetes;c_VC2_1_Bac22;o_f_g                                                              | 0.0% | 0.0% | 0.0% | 0.0% | 0.0% | 0.0% |
| k_Bacteria;p_Bacteroidetes;c_Rhodothermi;o_Rhodothermales:f_Rhodothermaceae:g                               | 0.0% | 0.0% | 0.0% | 0.0% | 0.0% | 0.0% |
| k_Bacteria;p_Bacteroidetes;c_Rhodothermi;o_Rhodothermales:f_Rhodothermaceae:g_Rubricoccus                   | 0.0% | 0.0% | 0.1% | 0.0% | 0.0% | 0.0% |
| k_Bacteria;p_Bacteroidetes;c_Saprospirae;o_Saprospirales:f_g                                                | 0.1% | 0.1% | 0.1% | 0.3% | 0.0% | 0.0% |
| k_Bacteria;p_Bacteroidetes;c_Saprospirae;o_Saprospirales:f_Chitinophagaceae;Other                           | 0.0% | 0.0% | 0.0% | 0.0% | 0.0% | 0.0% |
| k_Bacteria;p_Bacteroidetes;c_Saprospirae;o_Saprospirales:f_Chitinophagaceae:g                               | 2.6% | 1.7% | 3.4% | 5.9% | 1.0% | 2.3% |



|                                                                                                        |      |      |      |      |      |      |      |
|--------------------------------------------------------------------------------------------------------|------|------|------|------|------|------|------|
| k_Bacteria:p_Bacteroidetes;c_[Saprosirae];o_[Saprosirales];f_Chitinophagaceae;g_Chitinophaga           | 0.0% | 0.0% | 0.0% | 0.1% | 0.0% | 0.0% | 0.0% |
| k_Bacteria:p_Bacteroidetes;c_[Saprosirae];o_[Saprosirales];f_Chitinophagaceae;g_Flavihumibacter        | 0.0% | 0.0% | 0.1% | 0.0% | 0.0% | 0.0% | 0.0% |
| k_Bacteria:p_Bacteroidetes;c_[Saprosirae];o_[Saprosirales];f_Chitinophagaceae;g_Flavisolibacter        | 0.3% | 0.1% | 1.3% | 0.1% | 0.0% | 0.1% | 0.5% |
| k_Bacteria:p_Bacteroidetes;c_[Saprosirae];o_[Saprosirales];f_Chitinophagaceae;g_Niabella               | 0.0% | 0.0% | 0.0% | 0.0% | 0.0% | 0.0% | 0.0% |
| k_Bacteria:p_Bacteroidetes;c_[Saprosirae];o_[Saprosirales];f_Chitinophagaceae;g_Niastella              | 0.0% | 0.0% | 0.0% | 0.0% | 0.0% | 0.0% | 0.0% |
| k_Bacteria:p_Bacteroidetes;c_[Saprosirae];o_[Saprosirales];f_Chitinophagaceae;g_Sediminibacterium      | 0.0% | 0.0% | 0.0% | 0.1% | 0.0% | 0.0% | 0.0% |
| k_Bacteria:p_Bacteroidetes;c_[Saprosirae];o_[Saprosirales];f_Chitinophagaceae;g_Segetibacter           | 0.0% | 0.0% | 0.0% | 0.0% | 0.0% | 0.0% | 0.0% |
| k_Bacteria:p_Bacteroidetes;c_[Saprosirae];o_[Saprosirales];f_Saprosiraceae;g_                          | 0.5% | 0.8% | 0.6% | 0.9% | 0.0% | 0.0% | 0.8% |
| k_Bacteria:p_Bacteroidetes;c_[Saprosirae];o_[Saprosirales];f_Saprosiraceae;g_Haliscomenobacter         | 0.0% | 0.0% | 0.0% | 0.0% | 0.0% | 0.0% | 0.0% |
| k_Bacteria:p_Bacteroidetes;c_[Saprosirae];o_[Saprosirales];f_Saprosiraceae;g_Saprosira                 | 0.0% | 0.0% | 0.0% | 0.0% | 0.0% | 0.0% | 0.0% |
| k_Bacteria:p_Chlamydiae;c_Chlamydiia;o_f_:g_                                                           | 0.1% | 0.1% | 0.0% | 0.2% | 0.0% | 0.0% | 0.0% |
| k_Bacteria:p_Chlamydiae;c_Chlamydiia;o_Chlamydiales;Other;Other                                        | 0.0% | 0.0% | 0.0% | 0.0% | 0.0% | 0.0% | 0.0% |
| k_Bacteria:p_Chlamydiae;c_Chlamydiia;o_Chlamydiales;f_:g_                                              | 0.0% | 0.0% | 0.1% | 0.1% | 0.0% | 0.0% | 0.0% |
| k_Bacteria:p_Chlamydiae;c_Chlamydiia;o_Chlamydiales;f_Chlamydiaceae;g_                                 | 0.0% | 0.0% | 0.0% | 0.0% | 0.0% | 0.0% | 0.0% |
| k_Bacteria:p_Chlamydiae;c_Chlamydiia;o_Chlamydiales;f_Chlamydiaceae;g_Chlamydia                        | 0.0% | 0.0% | 0.0% | 0.0% | 0.0% | 0.0% | 0.0% |
| k_Bacteria:p_Chlamydiae;c_Chlamydiia;o_Chlamydiales;f_Criblamydiaceae;Other                            | 0.0% | 0.0% | 0.0% | 0.0% | 0.0% | 0.0% | 0.0% |
| k_Bacteria:p_Chlamydiae;c_Chlamydiia;o_Chlamydiales;f_Criblamydiaceae;g_                               | 0.0% | 0.0% | 0.0% | 0.0% | 0.0% | 0.0% | 0.0% |
| k_Bacteria:p_Chlamydiae;c_Chlamydiia;o_Chlamydiales;f_Parachlamydiaceae;Other                          | 0.2% | 0.2% | 0.1% | 0.5% | 0.1% | 0.1% | 0.3% |
| k_Bacteria:p_Chlamydiae;c_Chlamydiia;o_Chlamydiales;f_Parachlamydiaceae;g_                             | 0.0% | 0.0% | 0.0% | 0.1% | 0.1% | 0.0% | 0.0% |
| k_Bacteria:p_Chlamydiae;c_Chlamydiia;o_Chlamydiales;f_Parachlamydiaceae;g_Candidatus Protochlamydia    | 0.1% | 0.1% | 0.0% | 0.1% | 0.0% | 0.0% | 0.1% |
| k_Bacteria:p_Chlamydiae;c_Chlamydiia;o_Chlamydiales;f_Parachlamydiaceae;g_Parachlamydia                | 0.1% | 0.1% | 0.0% | 0.1% | 0.3% | 0.0% | 0.1% |
| k_Bacteria:p_Chlamydiae;c_Chlamydiia;o_Chlamydiales;f_Rhabdochlamydiaceae;g_Candidatus Rhabdochlamydia | 0.1% | 0.0% | 0.0% | 0.1% | 0.2% | 0.0% | 0.0% |
| k_Bacteria:p_Chlamydiae;c_Chlamydiia;o_Chlamydiales;f_Simkaniaceae;Other                               | 0.0% | 0.0% | 0.0% | 0.0% | 0.0% | 0.0% | 0.0% |
| k_Bacteria:p_Chlamydiae;c_Chlamydiia;o_Chlamydiales;f_Simkaniaceae;g_Simkania                          | 0.0% | 0.0% | 0.0% | 0.0% | 0.0% | 0.0% | 0.0% |
| k_Bacteria:p_Chlamydiae;c_Chlamydiia;o_Chlamydiales;f_Waddiaceae;Other                                 | 0.0% | 0.0% | 0.0% | 0.0% | 0.0% | 0.0% | 0.0% |
| k_Bacteria:p_Chlamydiae;c_Chlamydiia;o_Chlamydiales;f_Waddiaceae;g_                                    | 0.0% | 0.0% | 0.0% | 0.0% | 0.0% | 0.0% | 0.0% |
| k_Bacteria:p_Chlamydiae;c_Chlamydiia;o_Chlamydiales;f_Waddiaceae;g_Waddlia                             | 0.0% | 0.0% | 0.0% | 0.0% | 0.0% | 0.0% | 0.0% |
| k_Bacteria:p_Chlorobi;c_:o_:f_:g_                                                                      | 0.1% | 0.0% | 0.2% | 0.1% | 0.1% | 0.0% | 0.1% |
| k_Bacteria:p_Chlorobi;c_BSV26;o_A89;f_:g_                                                              | 0.0% | 0.0% | 0.0% | 0.0% | 0.0% | 0.0% | 0.0% |
| k_Bacteria:p_Chlorobi;c_BSV26;o_C20;f_:g_                                                              | 0.0% | 0.0% | 0.0% | 0.0% | 0.0% | 0.0% | 0.0% |
| k_Bacteria:p_Chlorobi;c_BSV26;o_PK329;f_:g_                                                            | 0.0% | 0.0% | 0.1% | 0.1% | 0.0% | 0.0% | 0.1% |
| k_Bacteria:p_Chlorobi;c_BSV26;o_VC38;f_:g_                                                             | 0.0% | 0.0% | 0.0% | 0.0% | 0.0% | 0.0% | 0.0% |
| k_Bacteria:p_Chlorobi;c_Ignavibacteria;o_Ignavibacteriales;f_Ignavibacteriaceae;g_                     | 0.0% | 0.0% | 0.0% | 0.0% | 0.0% | 0.0% | 0.0% |
| k_Bacteria:p_Chlorobi;c_OPB56;o_:f_:g_                                                                 | 0.1% | 0.1% | 0.1% | 0.0% | 0.0% | 0.0% | 0.1% |
| k_Bacteria:p_Chlorobi;c_SJA-28;o_:f_:g_                                                                | 0.2% | 0.0% | 0.3% | 0.2% | 0.0% | 0.1% | 0.6% |
| k_Bacteria:p_Chloroflexi;Other;Other;Other;Other                                                       | 0.0% | 0.0% | 0.0% | 0.0% | 0.0% | 0.0% | 0.0% |
| k_Bacteria:p_Chloroflexi;c_:o_:f_:g_                                                                   | 0.0% | 0.1% | 0.0% | 0.0% | 0.0% | 0.0% | 0.0% |
| k_Bacteria:p_Chloroflexi;c_Anaerolineae;Other;Other;Other                                              | 0.0% | 0.0% | 0.0% | 0.0% | 0.0% | 0.0% | 0.0% |
| k_Bacteria:p_Chloroflexi;c_Anaerolineae;o_:f_:g_                                                       | 0.1% | 0.0% | 0.2% | 0.0% | 0.0% | 0.1% | 0.0% |
| k_Bacteria:p_Chloroflexi;c_Anaerolineae;o_A31;f_:g_                                                    | 0.0% | 0.0% | 0.1% | 0.0% | 0.0% | 0.0% | 0.0% |
| k_Bacteria:p_Chloroflexi;c_Anaerolineae;o_A31;f_S47;g_                                                 | 0.2% | 0.0% | 0.1% | 0.2% | 0.0% | 0.0% | 1.0% |
| k_Bacteria:p_Chloroflexi;c_Anaerolineae;o_Anaerolineales;f_Anaerolinaceae;g_                           | 0.0% | 0.0% | 0.0% | 0.0% | 0.0% | 0.0% | 0.0% |
| k_Bacteria:p_Chloroflexi;c_Anaerolineae;o_Anaerolineales;f_Anaerolinaceae;g_Anaerolinea                | 0.0% | 0.0% | 0.0% | 0.0% | 0.0% | 0.0% | 0.2% |
| k_Bacteria:p_Chloroflexi;c_Anaerolineae;o_Ardenscatenales;f_Ardenscatenaceae;g_Ardenscatena            | 0.0% | 0.0% | 0.1% | 0.0% | 0.0% | 0.0% | 0.0% |
| k_Bacteria:p_Chloroflexi;c_Anaerolineae;o_CFB-26;f_:g_                                                 | 0.1% | 0.1% | 0.1% | 0.0% | 0.0% | 0.1% | 0.0% |
| k_Bacteria:p_Chloroflexi;c_Anaerolineae;o_Caldilineales;f_Caldilineaceae;g_                            | 0.2% | 0.3% | 0.3% | 0.1% | 0.0% | 0.1% | 0.5% |
| k_Bacteria:p_Chloroflexi;c_Anaerolineae;o_Caldilineales;f_Caldilineaceae;g_Caldilinea                  | 0.1% | 0.0% | 0.0% | 0.0% | 0.0% | 0.0% | 0.5% |
| k_Bacteria:p_Chloroflexi;c_Anaerolineae;o_Caldilineales;f_Caldilineaceae;g_Litorilinea                 | 0.0% | 0.0% | 0.0% | 0.0% | 0.0% | 0.0% | 0.0% |
| k_Bacteria:p_Chloroflexi;c_Anaerolineae;o_GCA004;f_:g_                                                 | 0.2% | 0.0% | 0.0% | 0.0% | 0.0% | 0.0% | 1.1% |
| k_Bacteria:p_Chloroflexi;c_Anaerolineae;o_H39;f_:g_                                                    | 0.1% | 0.1% | 0.1% | 0.0% | 0.0% | 0.1% | 0.0% |
| k_Bacteria:p_Chloroflexi;c_Anaerolineae;o_S0208;f_:g_                                                  | 0.3% | 0.1% | 0.4% | 0.2% | 0.0% | 0.4% | 0.8% |
| k_Bacteria:p_Chloroflexi;c_Anaerolineae;o_SB-34;f_:g_                                                  | 0.0% | 0.0% | 0.0% | 0.0% | 0.0% | 0.0% | 0.0% |
| k_Bacteria:p_Chloroflexi;c_Anaerolineae;o_SBR1031;f_A4b;g_                                             | 0.2% | 0.3% | 0.2% | 0.3% | 0.0% | 0.1% | 0.2% |
| k_Bacteria:p_Chloroflexi;c_Anaerolineae;o_SBR1031;f_SJA-101;g_                                         | 0.0% | 0.1% | 0.0% | 0.0% | 0.0% | 0.0% | 0.0% |
| k_Bacteria:p_Chloroflexi;c_Anaerolineae;o_SBR1031;f_oc28;g_                                            | 0.0% | 0.0% | 0.0% | 0.0% | 0.0% | 0.0% | 0.0% |
| k_Bacteria:p_Chloroflexi;c_Anaerolineae;o_SHA-20;f_:g_                                                 | 0.5% | 0.0% | 2.8% | 0.0% | 0.0% | 0.2% | 0.0% |
| k_Bacteria:p_Chloroflexi;c_Anaerolineae;o_SJA-15;f_:g_                                                 | 0.1% | 0.0% | 0.0% | 0.0% | 0.0% | 0.0% | 0.5% |
| k_Bacteria:p_Chloroflexi;c_Anaerolineae;o_WCHB1-50;f_:g_                                               | 0.2% | 0.0% | 0.9% | 0.1% | 0.0% | 0.2% | 0.2% |
| k_Bacteria:p_Chloroflexi;c_Anaerolineae;o_envOPS12;f_:g_                                               | 0.1% | 0.0% | 0.1% | 0.1% | 0.0% | 0.0% | 0.3% |
| k_Bacteria:p_Chloroflexi;c_Anaerolineae;o_pLW-97;f_:g_                                                 | 0.0% | 0.0% | 0.0% | 0.0% | 0.0% | 0.0% | 0.0% |
| k_Bacteria:p_Chloroflexi;c_C0119;o_:f_:g_                                                              | 0.1% | 0.0% | 0.2% | 0.1% | 0.0% | 0.0% | 0.1% |
| k_Bacteria:p_Chloroflexi;c_Chloroflexi;o_AKIW781;f_:g_                                                 | 0.0% | 0.0% | 0.0% | 0.0% | 0.0% | 0.0% | 0.0% |
| k_Bacteria:p_Chloroflexi;c_Chloroflexi;o_Chloroflexales;Other;Other                                    | 0.0% | 0.0% | 0.0% | 0.0% | 0.0% | 0.0% | 0.0% |
| k_Bacteria:p_Chloroflexi;c_Chloroflexi;o_Chloroflexales;f_01D2Z48;g_                                   | 0.0% | 0.0% | 0.0% | 0.0% | 0.0% | 0.0% | 0.0% |
| k_Bacteria:p_Chloroflexi;c_Chloroflexi;o_Chloroflexales;f_Chloroflexaceae;Other                        | 0.0% | 0.0% | 0.0% | 0.0% | 0.0% | 0.0% | 0.0% |
| k_Bacteria:p_Chloroflexi;c_Chloroflexi;o_Chloroflexales;f_Chloroflexaceae;g_                           | 0.0% | 0.0% | 0.0% | 0.0% | 0.0% | 0.0% | 0.0% |
| k_Bacteria:p_Chloroflexi;c_Chloroflexi;o_Chloroflexales;f_Chloroflexaceae;g_Chloroflexus               | 0.0% | 0.0% | 0.0% | 0.0% | 0.0% | 0.0% | 0.0% |

|                                                                                                         |      |      |      |      |       |      |      |
|---------------------------------------------------------------------------------------------------------|------|------|------|------|-------|------|------|
| k_Bacteria:p_Chloroflexi;c_Chloroflexi;o_Chloroflexales:f_Chloroflexaceae:g_Chloronema                  | 0.0% | 0.0% | 0.0% | 0.0% | 0.0%  | 0.0% | 0.0% |
| k_Bacteria:p_Chloroflexi;c_Chloroflexi;o_Chloroflexales:f_FFCH7168:g_                                   | 0.0% | 0.0% | 0.0% | 0.0% | 0.0%  | 0.0% | 0.0% |
| k_Bacteria:p_Chloroflexi;c_Chloroflexi;o_Chloroflexales:f_Oscillochloridaceae:g_Oscillochloris          | 0.0% | 0.0% | 0.0% | 0.0% | 0.0%  | 0.0% | 0.0% |
| k_Bacteria:p_Chloroflexi;c_Chloroflexi;o_Chloroflexales:f_[Chlorothrixaceae]:g_                         | 0.0% | 0.0% | 0.0% | 0.0% | 0.0%  | 0.0% | 0.0% |
| k_Bacteria:p_Chloroflexi;c_Chloroflexi;o_Herpetosiphonales:f_:g_                                        | 0.0% | 0.0% | 0.0% | 0.0% | 0.0%  | 0.0% | 0.0% |
| k_Bacteria:p_Chloroflexi;c_Chloroflexi;o_[Roseiflexales];Other;Other                                    | 0.0% | 0.0% | 0.0% | 0.0% | 0.0%  | 0.0% | 0.0% |
| k_Bacteria:p_Chloroflexi;c_Chloroflexi;o_[Roseiflexales];f_:g_                                          | 0.1% | 0.0% | 0.0% | 0.1% | 0.0%  | 0.0% | 0.2% |
| k_Bacteria:p_Chloroflexi;c_Chloroflexi;o_[Roseiflexales];f_[Kouleothrixaceae]:g_                        | 0.1% | 0.0% | 0.1% | 0.2% | 0.0%  | 0.1% | 0.3% |
| k_Bacteria:p_Chloroflexi;c_Chloroflexi;o_[Roseiflexales];f_[Roseiflexaceae]:g_                          | 0.0% | 0.0% | 0.0% | 0.0% | 0.0%  | 0.0% | 0.0% |
| k_Bacteria:p_Chloroflexi;c_Dehalococcoidetes;Other;Other;Other                                          | 0.0% | 0.0% | 0.0% | 0.0% | 0.0%  | 0.0% | 0.0% |
| k_Bacteria:p_Chloroflexi;c_Dehalococcoidetes;o_Dehalococcoidales:f_:g_                                  | 0.0% | 0.0% | 0.0% | 0.0% | 0.0%  | 0.0% | 0.0% |
| k_Bacteria:p_Chloroflexi;c_Dehalococcoidetes;o_Dehalococcoidales:f_Dehalococcoidaceae:g_                | 0.0% | 0.0% | 0.0% | 0.0% | 0.0%  | 0.0% | 0.0% |
| k_Bacteria:p_Chloroflexi;c_Dehalococcoidetes;o_Dehalococcoidales:f_Dehalococcoidaceae:g_Dehalogenimonas | 0.0% | 0.0% | 0.0% | 0.0% | 0.0%  | 0.0% | 0.0% |
| k_Bacteria:p_Chloroflexi;c_Ellin6529;o_:f_:g_                                                           | 0.6% | 0.9% | 0.3% | 0.6% | 0.0%  | 0.3% | 1.3% |
| k_Bacteria:p_Chloroflexi;c_Gitt-GS-136;o_:f_:g_                                                         | 0.4% | 1.5% | 0.1% | 0.1% | 0.0%  | 0.4% | 0.2% |
| k_Bacteria:p_Chloroflexi;c_Ktedonobacteria;Other;Other;Other                                            | 0.0% | 0.0% | 0.0% | 0.0% | 0.0%  | 0.0% | 0.0% |
| k_Bacteria:p_Chloroflexi;c_Ktedonobacteria;o_:f_:g_                                                     | 0.0% | 0.0% | 0.0% | 0.0% | 0.1%  | 0.0% | 0.0% |
| k_Bacteria:p_Chloroflexi;c_Ktedonobacteria;o_B10-SB3A:f_:g_                                             | 0.0% | 0.0% | 0.0% | 0.0% | 0.0%  | 0.0% | 0.0% |
| k_Bacteria:p_Chloroflexi;c_Ktedonobacteria;o_B12-WMSP1:f_:g_                                            | 0.0% | 0.0% | 0.0% | 0.0% | 0.2%  | 0.0% | 0.0% |
| k_Bacteria:p_Chloroflexi;c_Ktedonobacteria;o_Elev-1554:f_:g_                                            | 0.0% | 0.0% | 0.0% | 0.0% | 0.0%  | 0.0% | 0.0% |
| k_Bacteria:p_Chloroflexi;c_Ktedonobacteria;o_JG30-KF-AS9:f_:g_                                          | 0.0% | 0.0% | 0.0% | 0.0% | 0.0%  | 0.0% | 0.0% |
| k_Bacteria:p_Chloroflexi;c_Ktedonobacteria;o_Ktedonobacterales:f_Ktedonobacteraceae:g_                  | 0.0% | 0.0% | 0.0% | 0.0% | 0.0%  | 0.0% | 0.0% |
| k_Bacteria:p_Chloroflexi;c_Ktedonobacteria;o_Thermogemmatisporales:f_Thermogemmatisporaceae:g_          | 2.5% | 0.0% | 0.0% | 0.1% | 15.1% | 0.0% | 0.0% |
| k_Bacteria:p_Chloroflexi;c_MVP-21;o_:f_:g_                                                              | 0.0% | 0.0% | 0.0% | 0.0% | 0.0%  | 0.0% | 0.0% |
| k_Bacteria:p_Chloroflexi;c_P2-1IE;o_:f_:g_                                                              | 0.0% | 0.0% | 0.0% | 0.0% | 0.0%  | 0.1% | 0.0% |
| k_Bacteria:p_Chloroflexi;c_S085;o_:f_:g_                                                                | 0.8% | 1.1% | 0.6% | 0.5% | 0.1%  | 1.4% | 0.9% |
| k_Bacteria:p_Chloroflexi;c_SAR202;o_:f_:g_                                                              | 0.1% | 0.2% | 0.0% | 0.0% | 0.0%  | 0.1% | 0.0% |
| k_Bacteria:p_Chloroflexi;c_SHA-26;o_:f_:g_                                                              | 0.0% | 0.0% | 0.0% | 0.0% | 0.0%  | 0.0% | 0.0% |
| k_Bacteria:p_Chloroflexi;c_TK10;Other;Other;Other                                                       | 0.0% | 0.0% | 0.0% | 0.0% | 0.0%  | 0.0% | 0.0% |
| k_Bacteria:p_Chloroflexi;c_TK10;o_:f_:g_                                                                | 0.0% | 0.1% | 0.1% | 0.0% | 0.0%  | 0.1% | 0.0% |
| k_Bacteria:p_Chloroflexi;c_TK10;o_AKYG885;Other;Other                                                   | 0.0% | 0.0% | 0.0% | 0.0% | 0.0%  | 0.0% | 0.0% |
| k_Bacteria:p_Chloroflexi;c_TK10;o_AKYG885:f_:g_                                                         | 0.0% | 0.0% | 0.0% | 0.0% | 0.0%  | 0.0% | 0.0% |
| k_Bacteria:p_Chloroflexi;c_TK10;o_AKYG885:f_5B-12:g_                                                    | 0.1% | 0.0% | 0.1% | 0.0% | 0.0%  | 0.2% | 0.1% |
| k_Bacteria:p_Chloroflexi;c_TK10;o_AKYG885:f_Dolo_23:g_                                                  | 0.0% | 0.1% | 0.0% | 0.1% | 0.0%  | 0.0% | 0.1% |
| k_Bacteria:p_Chloroflexi;c_TK10;o_B07_WMSP1:f_:g_                                                       | 0.0% | 0.0% | 0.0% | 0.1% | 0.0%  | 0.0% | 0.0% |
| k_Bacteria:p_Chloroflexi;c_TK10;o_B07_WMSP1:f_FFCH4570:g_                                               | 0.0% | 0.0% | 0.0% | 0.0% | 0.0%  | 0.0% | 0.0% |
| k_Bacteria:p_Chloroflexi;c_TK17;o_:f_:g_                                                                | 0.1% | 0.2% | 0.1% | 0.0% | 0.2%  | 0.1% | 0.0% |
| k_Bacteria:p_Chloroflexi;c_TK17;o_mle1-48:f_:g_                                                         | 0.2% | 0.4% | 0.4% | 0.2% | 0.0%  | 0.2% | 0.0% |
| k_Bacteria:p_Chloroflexi;c_Thermomicrobia;o_:f_:g_                                                      | 0.0% | 0.0% | 0.0% | 0.0% | 0.0%  | 0.0% | 0.0% |
| k_Bacteria:p_Chloroflexi;c_Thermomicrobia;o_AKYG1722:f_:g_                                              | 0.1% | 0.5% | 0.1% | 0.0% | 0.0%  | 0.1% | 0.0% |
| k_Bacteria:p_Chloroflexi;c_Thermomicrobia;o_Ellin6537:f_:g_                                             | 0.0% | 0.0% | 0.0% | 0.0% | 0.0%  | 0.0% | 0.0% |
| k_Bacteria:p_Chloroflexi;c_Thermomicrobia;o_JG30-KF-CM45:f_:g_                                          | 0.3% | 0.7% | 0.2% | 0.2% | 0.0%  | 0.2% | 0.3% |
| k_Bacteria:p_Chloroflexi;c_Thermomicrobia;o_Sphaerobacterales:f_:g_                                     | 0.0% | 0.0% | 0.0% | 0.0% | 0.0%  | 0.0% | 0.0% |
| k_Bacteria:p_Chloroflexi;c_[Thermobacula];o_[Thermobaculales];f_[Thermobaculaceae]:g_Thermobaculum      | 0.0% | 0.0% | 0.0% | 0.0% | 0.0%  | 0.0% | 0.0% |
| k_Bacteria:p_Cyanobacteria;Other;Other;Other;Other                                                      | 0.0% | 0.0% | 0.0% | 0.0% | 0.0%  | 0.0% | 0.0% |
| k_Bacteria:p_Cyanobacteria;c_:o_:f_:g_                                                                  | 0.0% | 0.0% | 0.0% | 0.0% | 0.0%  | 0.0% | 0.0% |
| k_Bacteria:p_Cyanobacteria;c_4C0d-2;o_MLE1-12:f_:g_                                                     | 0.0% | 0.0% | 0.0% | 0.0% | 0.1%  | 0.0% | 0.1% |
| k_Bacteria:p_Cyanobacteria;c_4C0d-2;o_SM1D11:f_:g_                                                      | 0.0% | 0.0% | 0.0% | 0.0% | 0.0%  | 0.0% | 0.0% |
| k_Bacteria:p_Cyanobacteria;c_4C0d-2;o_SM2F09:f_:g_                                                      | 0.0% | 0.0% | 0.0% | 0.0% | 0.0%  | 0.0% | 0.0% |
| k_Bacteria:p_Cyanobacteria;c_4C0d-2;o_YS2:f_:g_                                                         | 0.0% | 0.0% | 0.0% | 0.0% | 0.0%  | 0.0% | 0.0% |
| k_Bacteria:p_Cyanobacteria;c_Chloroplast;o_Chlorophyta:f_:g_                                            | 0.0% | 0.0% | 0.0% | 0.0% | 0.0%  | 0.0% | 0.0% |
| k_Bacteria:p_Cyanobacteria;c_Chloroplast;o_Chlorophyta:f_Chlamydomonadaceae;Other                       | 0.0% | 0.0% | 0.0% | 0.0% | 0.0%  | 0.0% | 0.0% |
| k_Bacteria:p_Cyanobacteria;c_Chloroplast;o_Chlorophyta:f_Chlamydomonadaceae:g_                          | 0.0% | 0.0% | 0.0% | 0.0% | 0.0%  | 0.0% | 0.0% |
| k_Bacteria:p_Cyanobacteria;c_Chloroplast;o_Chlorophyta:f_Trebouxiophyceae;Other                         | 0.0% | 0.0% | 0.0% | 0.0% | 0.0%  | 0.0% | 0.0% |
| k_Bacteria:p_Cyanobacteria;c_Chloroplast;o_Chlorophyta:f_Trebouxiophyceae:g_                            | 0.0% | 0.0% | 0.0% | 0.0% | 0.0%  | 0.0% | 0.0% |
| k_Bacteria:p_Cyanobacteria;c_Chloroplast;o_Euglenozoa:f_:g_                                             | 0.0% | 0.0% | 0.0% | 0.0% | 0.0%  | 0.0% | 0.0% |
| k_Bacteria:p_Cyanobacteria;c_Chloroplast;o_Stramenopiles:f_:g_                                          | 0.0% | 0.0% | 0.0% | 0.1% | 0.0%  | 0.0% | 0.2% |
| k_Bacteria:p_Cyanobacteria;c_Chloroplast;o_Streptophyta:f_:g_                                           | 0.0% | 0.0% | 0.0% | 0.0% | 0.0%  | 0.0% | 0.0% |
| k_Bacteria:p_Cyanobacteria;c_ML635J-21;o_:f_:g_                                                         | 0.1% | 0.0% | 0.1% | 0.1% | 0.0%  | 0.1% | 0.1% |
| k_Bacteria:p_Cyanobacteria;c_Nostocophycideae;o_Nostocales:f_:g_                                        | 0.0% | 0.0% | 0.0% | 0.0% | 0.0%  | 0.0% | 0.0% |
| k_Bacteria:p_Cyanobacteria;c_Nostocophycideae;o_Nostocales:f_Nostocaceae;Other                          | 0.0% | 0.0% | 0.0% | 0.0% | 0.0%  | 0.0% | 0.0% |
| k_Bacteria:p_Cyanobacteria;c_Nostocophycideae;o_Nostocales:f_Nostocaceae:g_                             | 0.0% | 0.0% | 0.0% | 0.0% | 0.0%  | 0.0% | 0.0% |
| k_Bacteria:p_Cyanobacteria;c_Nostocophycideae;o_Nostocales:f_Nostocaceae:g_Anabaena                     | 0.0% | 0.0% | 0.0% | 0.0% | 0.0%  | 0.0% | 0.0% |
| k_Bacteria:p_Cyanobacteria;c_Nostocophycideae;o_Nostocales:f_Nostocaceae:g_Nodularia                    | 0.0% | 0.0% | 0.0% | 0.0% | 0.0%  | 0.0% | 0.0% |
| k_Bacteria:p_Cyanobacteria;c_Nostocophycideae;o_Nostocales:f_Nostocaceae:g_Nostoc                       | 0.0% | 0.0% | 0.0% | 0.0% | 0.0%  | 0.0% | 0.0% |
| k_Bacteria:p_Cyanobacteria;c_Nostocophycideae;o_Nostocales:f_Scytonemataceae:g_Scytonema                | 0.0% | 0.0% | 0.0% | 0.0% | 0.0%  | 0.0% | 0.0% |
| k_Bacteria:p_Cyanobacteria;c_Oscillatoriophycideae;Other;Other;Other                                    | 0.0% | 0.0% | 0.0% | 0.0% | 0.0%  | 0.0% | 0.0% |

|                                                                                                          |      |      |      |      |      |       |      |
|----------------------------------------------------------------------------------------------------------|------|------|------|------|------|-------|------|
| k_Bacteria;p_Cyanobacteria;c_Oscillatoriophycideae;o_Chroococcales;Other;Other                           | 0.0% | 0.0% | 0.0% | 0.0% | 0.0% | 0.0%  | 0.0% |
| k_Bacteria;p_Cyanobacteria;c_Oscillatoriophycideae;o_Chroococcales;f_g                                   | 0.0% | 0.0% | 0.0% | 0.0% | 0.0% | 0.0%  | 0.0% |
| k_Bacteria;p_Cyanobacteria;c_Oscillatoriophycideae;o_Chroococcales;f_Chroococcaceae;Other                | 0.0% | 0.0% | 0.0% | 0.0% | 0.0% | 0.0%  | 0.0% |
| k_Bacteria;p_Cyanobacteria;c_Oscillatoriophycideae;o_Chroococcales;f_Xenococcaceae;Other                 | 0.0% | 0.0% | 0.0% | 0.0% | 0.0% | 0.0%  | 0.0% |
| k_Bacteria;p_Cyanobacteria;c_Oscillatoriophycideae;o_Chroococcales;f_Xenococcaceae;g                     | 0.0% | 0.0% | 0.0% | 0.0% | 0.0% | 0.0%  | 0.0% |
| k_Bacteria;p_Cyanobacteria;c_Oscillatoriophycideae;o_Oscillatoriales;f_Phormidiaceae;g_Microcoleus       | 0.0% | 0.0% | 0.0% | 0.0% | 0.0% | 0.0%  | 0.0% |
| k_Bacteria;p_Cyanobacteria;c_Oscillatoriophycideae;o_Oscillatoriales;f_Phormidiaceae;g_Phormidium        | 0.0% | 0.0% | 0.0% | 0.0% | 0.0% | 0.0%  | 0.0% |
| k_Bacteria;p_Cyanobacteria;c_Oscillatoriophycideae;o_Oscillatoriales;f_Phormidiaceae;g_Planktothrix      | 0.0% | 0.0% | 0.0% | 0.0% | 0.0% | 0.0%  | 0.0% |
| k_Bacteria;p_Cyanobacteria;c_Synechococophycideae;o_Pseudanabaenales;f_Pseudanabaenaceae;Other           | 0.0% | 0.0% | 0.0% | 0.0% | 0.0% | 0.0%  | 0.0% |
| k_Bacteria;p_Cyanobacteria;c_Synechococophycideae;o_Pseudanabaenales;f_Pseudanabaenaceae;g               | 0.0% | 0.0% | 0.0% | 0.0% | 0.0% | 0.0%  | 0.1% |
| k_Bacteria;p_Cyanobacteria;c_Synechococophycideae;o_Pseudanabaenales;f_Pseudanabaenaceae;g_Arthonema     | 0.0% | 0.0% | 0.0% | 0.0% | 0.0% | 0.0%  | 0.0% |
| k_Bacteria;p_Cyanobacteria;c_Synechococophycideae;o_Pseudanabaenales;f_Pseudanabaenaceae;g_Halomicronema | 0.0% | 0.0% | 0.0% | 0.0% | 0.0% | 0.0%  | 0.0% |
| k_Bacteria;p_Cyanobacteria;c_Synechococophycideae;o_Pseudanabaenales;f_Pseudanabaenaceae;g_Leptolyngbya  | 0.0% | 0.0% | 0.0% | 0.0% | 0.0% | 0.0%  | 0.1% |
| k_Bacteria;p_Cyanobacteria;c_Synechococophycideae;o_Pseudanabaenales;f_Pseudanabaenaceae;g_Pseudanabaena | 0.0% | 0.0% | 0.0% | 0.0% | 0.0% | 0.0%  | 0.0% |
| k_Bacteria;p_Cyanobacteria;c_Synechococophycideae;o_Synechococcales;f_Acaryochloridaceae;g_Acarochloris  | 0.0% | 0.0% | 0.0% | 0.0% | 0.0% | 0.0%  | 0.0% |
| k_Bacteria;p_Elusimicrobia;c_o_f_g                                                                       | 0.0% | 0.0% | 0.0% | 0.0% | 0.0% | 0.0%  | 0.0% |
| k_Bacteria;p_Elusimicrobia;c_Elusimicrobia;o_f_g                                                         | 0.0% | 0.0% | 0.0% | 0.0% | 0.0% | 0.0%  | 0.0% |
| k_Bacteria;p_Elusimicrobia;c_Elusimicrobia;o_Elusimicrobiales;f_g                                        | 0.1% | 0.0% | 0.1% | 0.0% | 0.2% | 0.0%  | 0.0% |
| k_Bacteria;p_Elusimicrobia;c_Elusimicrobia;o_FAC88;f_g                                                   | 0.2% | 0.0% | 0.2% | 0.2% | 0.4% | 0.0%  | 0.2% |
| k_Bacteria;p_Elusimicrobia;c_Elusimicrobia;o_Iibf_g                                                      | 0.1% | 0.2% | 0.2% | 0.1% | 0.0% | 0.0%  | 0.1% |
| k_Bacteria;p_Elusimicrobia;c_Elusimicrobia;o_MVP-88;f_g                                                  | 0.0% | 0.0% | 0.1% | 0.0% | 0.0% | 0.0%  | 0.0% |
| k_Bacteria;p_Elusimicrobia;c_Endomicrobia;o_f_g                                                          | 0.0% | 0.0% | 0.0% | 0.0% | 0.0% | 0.0%  | 0.0% |
| k_Bacteria;p_FBP;c_o_f_g                                                                                 | 0.0% | 0.0% | 0.0% | 0.0% | 0.0% | 0.0%  | 0.0% |
| k_Bacteria;p_FCPU426;c_o_f_g                                                                             | 0.0% | 0.0% | 0.0% | 0.0% | 0.2% | 0.0%  | 0.0% |
| k_Bacteria;p_Fibrobaeteres;c_o_f_g                                                                       | 0.0% | 0.0% | 0.0% | 0.0% | 0.0% | 0.0%  | 0.0% |
| k_Bacteria;p_Fibrobaeteres;c_B5-096;o_f_g                                                                | 0.0% | 0.0% | 0.0% | 0.0% | 0.0% | 0.0%  | 0.0% |
| k_Bacteria;p_Fibrobaeteres;c_Fibrobaeteria;o_258ds10;f_g                                                 | 0.0% | 0.0% | 0.0% | 0.0% | 0.0% | 0.0%  | 0.0% |
| k_Bacteria;p_Fibrobaeteres;c_Fibrobaeteria;o_Ucp1540;f_g                                                 | 0.0% | 0.0% | 0.2% | 0.0% | 0.0% | 0.0%  | 0.0% |
| k_Bacteria;p_Fibrobaeteres;c_SBZC_2415;o_f_g                                                             | 0.0% | 0.0% | 0.0% | 0.0% | 0.0% | 0.0%  | 0.0% |
| k_Bacteria;p_Fibrobaeteres;c_TG3;o_TG3-1;f_g                                                             | 0.0% | 0.0% | 0.0% | 0.0% | 0.0% | 0.0%  | 0.0% |
| k_Bacteria;p_Fibrobaeteres;c_TG3;o_TG3-1;f_TSCOR003-O20;g                                                | 0.0% | 0.0% | 0.0% | 0.0% | 0.0% | 0.0%  | 0.0% |
| k_Bacteria;p_Firmicutes;Other;Other;Other;Other                                                          | 0.0% | 0.0% | 0.0% | 0.0% | 0.0% | 0.0%  | 0.0% |
| k_Bacteria;p_Firmicutes;c_Bacilli;Other;Other;Other                                                      | 0.0% | 0.0% | 0.0% | 0.0% | 0.0% | 0.0%  | 0.0% |
| k_Bacteria;p_Firmicutes;c_Bacilli;o_Bacillales;Other;Other                                               | 0.3% | 1.3% | 0.0% | 0.3% | 0.1% | 0.2%  | 0.0% |
| k_Bacteria;p_Firmicutes;c_Bacilli;o_Bacillales;f_g                                                       | 0.1% | 0.1% | 0.0% | 0.0% | 0.0% | 0.3%  | 0.0% |
| k_Bacteria;p_Firmicutes;c_Bacilli;o_Bacillales;f_Alicyclobacillaceae;g                                   | 0.0% | 0.0% | 0.0% | 0.0% | 0.0% | 0.0%  | 0.0% |
| k_Bacteria;p_Firmicutes;c_Bacilli;o_Bacillales;f_Alicyclobacillaceae;g_Alicyclobacillus                  | 0.1% | 0.0% | 0.0% | 0.1% | 0.0% | 0.0%  | 0.6% |
| k_Bacteria;p_Firmicutes;c_Bacilli;o_Bacillales;f_Bacillaceae;Other                                       | 0.0% | 0.0% | 0.0% | 0.0% | 0.0% | 0.0%  | 0.0% |
| k_Bacteria;p_Firmicutes;c_Bacilli;o_Bacillales;f_Bacillaceae;g                                           | 0.1% | 0.2% | 0.0% | 0.0% | 0.0% | 0.2%  | 0.1% |
| k_Bacteria;p_Firmicutes;c_Bacilli;o_Bacillales;f_Bacillaceae;g_Anaerobacillus                            | 0.0% | 0.0% | 0.0% | 0.0% | 0.0% | 0.0%  | 0.0% |
| k_Bacteria;p_Firmicutes;c_Bacilli;o_Bacillales;f_Bacillaceae;g_Anoxybacillus                             | 0.0% | 0.0% | 0.0% | 0.0% | 0.0% | 0.0%  | 0.0% |
| k_Bacteria;p_Firmicutes;c_Bacilli;o_Bacillales;f_Bacillaceae;g_Bacillus                                  | 5.6% | 4.9% | 0.7% | 1.4% | 3.7% | 21.4% | 1.7% |
| k_Bacteria;p_Firmicutes;c_Bacilli;o_Bacillales;f_Bacillaceae;g_Geobacillus                               | 0.0% | 0.0% | 0.0% | 0.0% | 0.0% | 0.0%  | 0.0% |
| k_Bacteria;p_Firmicutes;c_Bacilli;o_Bacillales;f_Bacillaceae;g_Natronobacillus                           | 0.0% | 0.0% | 0.0% | 0.0% | 0.0% | 0.0%  | 0.0% |
| k_Bacteria;p_Firmicutes;c_Bacilli;o_Bacillales;f_Bacillaceae;g_Oceanobacillus                            | 0.0% | 0.0% | 0.0% | 0.0% | 0.0% | 0.0%  | 0.0% |
| k_Bacteria;p_Firmicutes;c_Bacilli;o_Bacillales;f_Bacillaceae;g_Pontibacillus                             | 0.0% | 0.0% | 0.0% | 0.0% | 0.0% | 0.0%  | 0.0% |
| k_Bacteria;p_Firmicutes;c_Bacilli;o_Bacillales;f_Bacillaceae;g_Thalassobacillus                          | 0.0% | 0.0% | 0.0% | 0.0% | 0.0% | 0.0%  | 0.0% |
| k_Bacteria;p_Firmicutes;c_Bacilli;o_Bacillales;f_Bacillaceae;g_Virgibacillus                             | 0.0% | 0.0% | 0.0% | 0.0% | 0.0% | 0.0%  | 0.0% |
| k_Bacteria;p_Firmicutes;c_Bacilli;o_Bacillales;f_Listeriaceae;Other                                      | 0.0% | 0.0% | 0.0% | 0.0% | 0.0% | 0.0%  | 0.0% |
| k_Bacteria;p_Firmicutes;c_Bacilli;o_Bacillales;f_Paenibacillaceae;Other                                  | 0.0% | 0.0% | 0.0% | 0.0% | 0.0% | 0.0%  | 0.0% |
| k_Bacteria;p_Firmicutes;c_Bacilli;o_Bacillales;f_Paenibacillaceae;g                                      | 0.0% | 0.0% | 0.0% | 0.0% | 0.0% | 0.0%  | 0.0% |
| k_Bacteria;p_Firmicutes;c_Bacilli;o_Bacillales;f_Paenibacillaceae;g_Ammoniphilus                         | 0.0% | 0.0% | 0.0% | 0.0% | 0.0% | 0.2%  | 0.0% |
| k_Bacteria;p_Firmicutes;c_Bacilli;o_Bacillales;f_Paenibacillaceae;g_Aneurinibacillus                     | 0.0% | 0.0% | 0.0% | 0.0% | 0.0% | 0.0%  | 0.0% |
| k_Bacteria;p_Firmicutes;c_Bacilli;o_Bacillales;f_Paenibacillaceae;g_Brevibacillus                        | 0.0% | 0.0% | 0.0% | 0.0% | 0.0% | 0.0%  | 0.0% |
| k_Bacteria;p_Firmicutes;c_Bacilli;o_Bacillales;f_Paenibacillaceae;g_Cohnella                             | 0.1% | 0.1% | 0.0% | 0.1% | 0.2% | 0.1%  | 0.0% |
| k_Bacteria;p_Firmicutes;c_Bacilli;o_Bacillales;f_Paenibacillaceae;g_Paenibacillus                        | 0.4% | 0.4% | 0.1% | 0.5% | 0.3% | 0.9%  | 0.2% |
| k_Bacteria;p_Firmicutes;c_Bacilli;o_Bacillales;f_Pasteuriaceae;g_Pasteuria                               | 0.0% | 0.0% | 0.0% | 0.0% | 0.0% | 0.0%  | 0.0% |
| k_Bacteria;p_Firmicutes;c_Bacilli;o_Bacillales;f_Planococcaceae;Other                                    | 0.0% | 0.0% | 0.0% | 0.0% | 0.0% | 0.0%  | 0.0% |
| k_Bacteria;p_Firmicutes;c_Bacilli;o_Bacillales;f_Planococcaceae;g                                        | 0.2% | 0.5% | 0.0% | 0.1% | 0.0% | 0.3%  | 0.1% |
| k_Bacteria;p_Firmicutes;c_Bacilli;o_Bacillales;f_Planococcaceae;g_Lysinibacillus                         | 0.0% | 0.1% | 0.0% | 0.0% | 0.0% | 0.1%  | 0.0% |
| k_Bacteria;p_Firmicutes;c_Bacilli;o_Bacillales;f_Planococcaceae;g_Paenisporosarcina                      | 0.1% | 0.2% | 0.0% | 0.1% | 0.0% | 0.4%  | 0.0% |
| k_Bacteria;p_Firmicutes;c_Bacilli;o_Bacillales;f_Planococcaceae;g_Planococcus                            | 0.0% | 0.0% | 0.0% | 0.0% | 0.0% | 0.0%  | 0.0% |
| k_Bacteria;p_Firmicutes;c_Bacilli;o_Bacillales;f_Planococcaceae;g_Planomicrobium                         | 0.0% | 0.0% | 0.0% | 0.0% | 0.0% | 0.0%  | 0.0% |
| k_Bacteria;p_Firmicutes;c_Bacilli;o_Bacillales;f_Planococcaceae;g_Rummeliibacillus                       | 0.0% | 0.0% | 0.0% | 0.0% | 0.0% | 0.0%  | 0.0% |
| k_Bacteria;p_Firmicutes;c_Bacilli;o_Bacillales;f_Planococcaceae;g_Solibacillus                           | 0.1% | 0.1% | 0.0% | 0.0% | 0.0% | 0.3%  | 0.0% |
| k_Bacteria;p_Firmicutes;c_Bacilli;o_Bacillales;f_Planococcaceae;g_Sporosarcina                           | 0.2% | 0.4% | 0.1% | 0.3% | 0.0% | 0.2%  | 0.0% |
| k_Bacteria;p_Firmicutes;c_Bacilli;o_Bacillales;f_Planococcaceae;g_Ureibacillus                           | 0.0% | 0.0% | 0.0% | 0.0% | 0.0% | 0.0%  | 0.0% |



|                                                                                                       |      |      |      |      |      |      |      |
|-------------------------------------------------------------------------------------------------------|------|------|------|------|------|------|------|
| k_Bacteria;p_Firmicutes;c_Bacilli;o_Bacillales:f_Sporolactobacillaceae;Other                          | 0.0% | 0.0% | 0.0% | 0.0% | 0.0% | 0.0% | 0.0% |
| k_Bacteria;p_Firmicutes;c_Bacilli;o_Bacillales:f_Sporolactobacillaceae:g_Sporolactobacillus           | 0.0% | 0.0% | 0.0% | 0.0% | 0.0% | 0.0% | 0.0% |
| k_Bacteria;p_Firmicutes;c_Bacilli;o_Bacillales:f_Staphylococcaceae:g_Staphylococcus                   | 0.0% | 0.0% | 0.0% | 0.0% | 0.0% | 0.0% | 0.0% |
| k_Bacteria;p_Firmicutes;c_Bacilli;o_Bacillales:f_Thermoactinomycetaceae;Other                         | 0.0% | 0.0% | 0.0% | 0.0% | 0.0% | 0.0% | 0.0% |
| k_Bacteria;p_Firmicutes;c_Bacilli;o_Bacillales:f_Thermoactinomycetaceae:g_                            | 0.0% | 0.0% | 0.0% | 0.0% | 0.0% | 0.0% | 0.0% |
| k_Bacteria;p_Firmicutes;c_Bacilli;o_Bacillales:f_Thermoactinomycetaceae:g_Planifilum                  | 0.0% | 0.0% | 0.0% | 0.0% | 0.0% | 0.0% | 0.0% |
| k_Bacteria;p_Firmicutes;c_Bacilli;o_Bacillales:f_Thermoactinomycetaceae:g_Shimazuella                 | 0.0% | 0.0% | 0.0% | 0.0% | 0.0% | 0.0% | 0.0% |
| k_Bacteria;p_Firmicutes;c_Bacilli;o_Bacillales:f_[Exiguobacteraceae];g_                               | 0.0% | 0.0% | 0.0% | 0.0% | 0.0% | 0.0% | 0.0% |
| k_Bacteria;p_Firmicutes;c_Bacilli;o_Bacillales:f_[Exiguobacteraceae];g_Exiguobacterium                | 0.0% | 0.0% | 0.0% | 0.0% | 0.0% | 0.0% | 0.0% |
| k_Bacteria;p_Firmicutes;c_Bacilli;o_Bacillales:f_[Thermicanaceae];g_Thermicanus                       | 0.0% | 0.0% | 0.0% | 0.0% | 0.0% | 0.0% | 0.0% |
| k_Bacteria;p_Firmicutes;c_Bacilli;o_Haloplasmatales:f_Haloplasmataceae:g_                             | 0.0% | 0.0% | 0.0% | 0.0% | 0.0% | 0.0% | 0.0% |
| k_Bacteria;p_Firmicutes;c_Bacilli;o_Lactobacillales:f_:g_                                             | 0.0% | 0.0% | 0.0% | 0.0% | 0.0% | 0.0% | 0.0% |
| k_Bacteria;p_Firmicutes;c_Bacilli;o_Lactobacillales:f_Aerococcaceae:g_Facklamia                       | 0.0% | 0.0% | 0.0% | 0.0% | 0.0% | 0.0% | 0.0% |
| k_Bacteria;p_Firmicutes;c_Bacilli;o_Lactobacillales:f_Carnobacteriaceae:g_Carnobacterium              | 0.0% | 0.0% | 0.0% | 0.0% | 0.0% | 0.0% | 0.0% |
| k_Bacteria;p_Firmicutes;c_Bacilli;o_Lactobacillales:f_Carnobacteriaceae:g_Deszenvia                   | 0.0% | 0.0% | 0.0% | 0.0% | 0.0% | 0.0% | 0.0% |
| k_Bacteria;p_Firmicutes;c_Bacilli;o_Lactobacillales:f_Enterococcaceae:g_Enterococcus                  | 0.0% | 0.0% | 0.0% | 0.0% | 0.0% | 0.0% | 0.0% |
| k_Bacteria;p_Firmicutes;c_Bacilli;o_Lactobacillales:f_Lactobacillaceae:g_Lactobacillus                | 0.0% | 0.0% | 0.0% | 0.0% | 0.0% | 0.0% | 0.0% |
| k_Bacteria;p_Firmicutes;c_Bacilli;o_Lactobacillales:f_Leuconostocaceae:g_Leuconostoc                  | 0.0% | 0.0% | 0.0% | 0.0% | 0.0% | 0.0% | 0.0% |
| k_Bacteria;p_Firmicutes;c_Bacilli;o_Turicibacterales:f_Turicibacteraceae:g_Turicibacter               | 0.0% | 0.0% | 0.0% | 0.0% | 0.1% | 0.0% | 0.0% |
| k_Bacteria;p_Firmicutes;c_Clostridia;o_:f_:g_                                                         | 0.0% | 0.0% | 0.0% | 0.0% | 0.0% | 0.0% | 0.0% |
| k_Bacteria;p_Firmicutes;c_Clostridia;o_Clostridiales;Other;Other                                      | 0.0% | 0.0% | 0.0% | 0.0% | 0.0% | 0.0% | 0.0% |
| k_Bacteria;p_Firmicutes;c_Clostridia;o_Clostridiales:f_:g_                                            | 0.0% | 0.0% | 0.0% | 0.0% | 0.0% | 0.0% | 0.0% |
| k_Bacteria;p_Firmicutes;c_Clostridia;o_Clostridiales:f_Caldicoprobacteraceae:g_Caldicoprobacter       | 0.0% | 0.0% | 0.0% | 0.0% | 0.0% | 0.0% | 0.0% |
| k_Bacteria;p_Firmicutes;c_Clostridia;o_Clostridiales:f_Christensenellaceae:g_                         | 0.0% | 0.0% | 0.0% | 0.0% | 0.0% | 0.0% | 0.0% |
| k_Bacteria;p_Firmicutes;c_Clostridia;o_Clostridiales:f_Clostridiaceae;Other                           | 0.0% | 0.0% | 0.0% | 0.0% | 0.0% | 0.0% | 0.0% |
| k_Bacteria;p_Firmicutes;c_Clostridia;o_Clostridiales:f_Clostridiaceae:g_                              | 0.0% | 0.1% | 0.0% | 0.0% | 0.0% | 0.0% | 0.0% |
| k_Bacteria;p_Firmicutes;c_Clostridia;o_Clostridiales:f_Clostridiaceae:g_Alkaliphilus                  | 0.0% | 0.0% | 0.0% | 0.0% | 0.0% | 0.0% | 0.0% |
| k_Bacteria;p_Firmicutes;c_Clostridia;o_Clostridiales:f_Clostridiaceae:g_Caloramator                   | 0.0% | 0.0% | 0.0% | 0.0% | 0.0% | 0.0% | 0.0% |
| k_Bacteria;p_Firmicutes;c_Clostridia;o_Clostridiales:f_Clostridiaceae:g_Candidatus Arthromitus        | 0.0% | 0.0% | 0.0% | 0.0% | 0.0% | 0.0% | 0.0% |
| k_Bacteria;p_Firmicutes;c_Clostridia;o_Clostridiales:f_Clostridiaceae:g_Clostridium                   | 0.1% | 0.1% | 0.1% | 0.1% | 0.0% | 0.1% | 0.3% |
| k_Bacteria;p_Firmicutes;c_Clostridia;o_Clostridiales:f_Clostridiaceae:g_Geoposporobacter Thermotalea  | 0.0% | 0.0% | 0.0% | 0.0% | 0.0% | 0.0% | 0.0% |
| k_Bacteria;p_Firmicutes;c_Clostridia;o_Clostridiales:f_Clostridiaceae:g_Oxobacter                     | 0.0% | 0.0% | 0.0% | 0.0% | 0.0% | 0.0% | 0.0% |
| k_Bacteria;p_Firmicutes;c_Clostridia;o_Clostridiales:f_Clostridiaceae:g_SMB53                         | 0.0% | 0.0% | 0.0% | 0.0% | 0.0% | 0.0% | 0.0% |
| k_Bacteria;p_Firmicutes;c_Clostridia;o_Clostridiales:f_Clostridiaceae:g_Sarcina                       | 0.0% | 0.0% | 0.0% | 0.0% | 0.0% | 0.0% | 0.0% |
| k_Bacteria;p_Firmicutes;c_Clostridia;o_Clostridiales:f_Clostridiaceae:g_Thermoanaerobacterium         | 0.0% | 0.0% | 0.0% | 0.0% | 0.0% | 0.0% | 0.0% |
| k_Bacteria;p_Firmicutes;c_Clostridia;o_Clostridiales:f_Dehalobacteriaceae:g_                          | 0.0% | 0.0% | 0.0% | 0.0% | 0.0% | 0.0% | 0.0% |
| k_Bacteria;p_Firmicutes;c_Clostridia;o_Clostridiales:f_Dehalobacteriaceae:g_Dehalobacterium           | 0.0% | 0.0% | 0.0% | 0.0% | 0.1% | 0.0% | 0.0% |
| k_Bacteria;p_Firmicutes;c_Clostridia;o_Clostridiales:f_EtOH8:g_                                       | 0.0% | 0.0% | 0.0% | 0.0% | 0.0% | 0.0% | 0.0% |
| k_Bacteria;p_Firmicutes;c_Clostridia;o_Clostridiales:f_Eubacteriaceae:g_                              | 0.0% | 0.0% | 0.0% | 0.0% | 0.0% | 0.0% | 0.0% |
| k_Bacteria;p_Firmicutes;c_Clostridia;o_Clostridiales:f_Gracilibacteraceae:g_                          | 0.0% | 0.0% | 0.0% | 0.0% | 0.0% | 0.0% | 0.1% |
| k_Bacteria;p_Firmicutes;c_Clostridia;o_Clostridiales:f_Gracilibacteraceae:g_Gracilibacter             | 0.0% | 0.0% | 0.0% | 0.0% | 0.0% | 0.0% | 0.0% |
| k_Bacteria;p_Firmicutes;c_Clostridia;o_Clostridiales:f_Gracilibacteraceae:g_Lutispora                 | 0.0% | 0.0% | 0.0% | 0.0% | 0.0% | 0.0% | 0.0% |
| k_Bacteria;p_Firmicutes;c_Clostridia;o_Clostridiales:f_Lachnospiraceae;Other                          | 0.0% | 0.0% | 0.0% | 0.0% | 0.0% | 0.0% | 0.0% |
| k_Bacteria;p_Firmicutes;c_Clostridia;o_Clostridiales:f_Lachnospiraceae:g_                             | 0.0% | 0.0% | 0.0% | 0.0% | 0.0% | 0.0% | 0.0% |
| k_Bacteria;p_Firmicutes;c_Clostridia;o_Clostridiales:f_Lachnospiraceae:g_Anaerostipes                 | 0.0% | 0.0% | 0.0% | 0.0% | 0.0% | 0.0% | 0.0% |
| k_Bacteria;p_Firmicutes;c_Clostridia;o_Clostridiales:f_Lachnospiraceae:g_Blautia                      | 0.0% | 0.0% | 0.0% | 0.0% | 0.0% | 0.0% | 0.0% |
| k_Bacteria;p_Firmicutes;c_Clostridia;o_Clostridiales:f_Lachnospiraceae:g_Coproccoccus                 | 0.1% | 0.0% | 0.0% | 0.1% | 0.0% | 0.5% | 0.0% |
| k_Bacteria;p_Firmicutes;c_Clostridia;o_Clostridiales:f_Lachnospiraceae:g_Dorea                        | 0.0% | 0.0% | 0.0% | 0.0% | 0.0% | 0.0% | 0.0% |
| k_Bacteria;p_Firmicutes;c_Clostridia;o_Clostridiales:f_Lachnospiraceae:g_Epulopiscium                 | 0.0% | 0.0% | 0.0% | 0.0% | 0.1% | 0.0% | 0.0% |
| k_Bacteria;p_Firmicutes;c_Clostridia;o_Clostridiales:f_Lachnospiraceae:g_Lachnospira                  | 0.0% | 0.0% | 0.0% | 0.0% | 0.0% | 0.0% | 0.0% |
| k_Bacteria;p_Firmicutes;c_Clostridia;o_Clostridiales:f_Lachnospiraceae:g_Roseburia                    | 0.0% | 0.0% | 0.0% | 0.0% | 0.0% | 0.0% | 0.0% |
| k_Bacteria;p_Firmicutes;c_Clostridia;o_Clostridiales:f_Peptococcaceae;Other                           | 0.0% | 0.0% | 0.0% | 0.0% | 0.0% | 0.0% | 0.0% |
| k_Bacteria;p_Firmicutes;c_Clostridia;o_Clostridiales:f_Peptococcaceae:g_                              | 0.0% | 0.0% | 0.0% | 0.0% | 0.0% | 0.1% | 0.0% |
| k_Bacteria;p_Firmicutes;c_Clostridia;o_Clostridiales:f_Peptococcaceae:g_Dehalobacter Syntrophobotulus | 0.0% | 0.0% | 0.0% | 0.0% | 0.0% | 0.0% | 0.0% |
| k_Bacteria;p_Firmicutes;c_Clostridia;o_Clostridiales:f_Peptococcaceae:g_Desulfonipora                 | 0.0% | 0.0% | 0.0% | 0.0% | 0.0% | 0.0% | 0.0% |
| k_Bacteria;p_Firmicutes;c_Clostridia;o_Clostridiales:f_Peptococcaceae:g_Desulfosporosinus             | 0.0% | 0.0% | 0.0% | 0.0% | 0.0% | 0.1% | 0.0% |
| k_Bacteria;p_Firmicutes;c_Clostridia;o_Clostridiales:f_Peptococcaceae:g_Desulfotomaculum              | 0.0% | 0.0% | 0.0% | 0.0% | 0.0% | 0.0% | 0.0% |
| k_Bacteria;p_Firmicutes;c_Clostridia;o_Clostridiales:f_Peptococcaceae:g_Desulfurispora                | 0.0% | 0.0% | 0.0% | 0.0% | 0.0% | 0.0% | 0.0% |
| k_Bacteria;p_Firmicutes;c_Clostridia;o_Clostridiales:f_Peptococcaceae:g_Pelotomaculum                 | 0.0% | 0.0% | 0.0% | 0.0% | 0.0% | 0.0% | 0.0% |
| k_Bacteria;p_Firmicutes;c_Clostridia;o_Clostridiales:f_Peptococcaceae:g_Sporotomaculum                | 0.0% | 0.0% | 0.0% | 0.0% | 0.0% | 0.0% | 0.0% |
| k_Bacteria;p_Firmicutes;c_Clostridia;o_Clostridiales:f_Peptococcaceae:g_WCHB1-84                      | 0.0% | 0.0% | 0.0% | 0.0% | 0.1% | 0.0% | 0.0% |
| k_Bacteria;p_Firmicutes;c_Clostridia;o_Clostridiales:f_Peptostreptococcaceae;Other                    | 0.0% | 0.1% | 0.0% | 0.1% | 0.0% | 0.0% | 0.1% |
| k_Bacteria;p_Firmicutes;c_Clostridia;o_Clostridiales:f_Peptostreptococcaceae:g_                       | 0.1% | 0.1% | 0.0% | 0.1% | 0.0% | 0.1% | 0.0% |
| k_Bacteria;p_Firmicutes;c_Clostridia;o_Clostridiales:f_Peptostreptococcaceae:g_Clostridium            | 0.0% | 0.0% | 0.0% | 0.0% | 0.0% | 0.0% | 0.0% |
| k_Bacteria;p_Firmicutes;c_Clostridia;o_Clostridiales:f_Peptostreptococcaceae:g_Tepidibacter           | 0.0% | 0.0% | 0.0% | 0.0% | 0.0% | 0.0% | 0.1% |
| k_Bacteria;p_Firmicutes;c_Clostridia;o_Clostridiales:f_Ruminococcaceae;Other                          | 0.0% | 0.0% | 0.0% | 0.0% | 0.0% | 0.0% | 0.0% |
| k_Bacteria;p_Firmicutes;c_Clostridia;o_Clostridiales:f_Ruminococcaceae:g_                             | 0.1% | 0.1% | 0.0% | 0.1% | 0.0% | 0.1% | 0.3% |

|                                                                                                        |      |      |      |      |      |      |      |
|--------------------------------------------------------------------------------------------------------|------|------|------|------|------|------|------|
| k_Bacteria;p_Firmicutes;c_Clostridia;o_Clostridiales;f_Ruminococcaceae;g_Anaerotruncus                 | 0.0% | 0.0% | 0.0% | 0.0% | 0.0% | 0.0% | 0.0% |
| k_Bacteria;p_Firmicutes;c_Clostridia;o_Clostridiales;f_Ruminococcaceae;g_Ethanoligenens                | 0.0% | 0.0% | 0.0% | 0.0% | 0.0% | 0.0% | 0.0% |
| k_Bacteria;p_Firmicutes;c_Clostridia;o_Clostridiales;f_Ruminococcaceae;g_Oscillospira                  | 0.0% | 0.0% | 0.0% | 0.0% | 0.0% | 0.0% | 0.0% |
| k_Bacteria;p_Firmicutes;c_Clostridia;o_Clostridiales;f_Ruminococcaceae;g_Ruminococcus                  | 0.0% | 0.0% | 0.0% | 0.0% | 0.0% | 0.0% | 0.0% |
| k_Bacteria;p_Firmicutes;c_Clostridia;o_Clostridiales;f_Symbiobacteriaceae;g_Symbiobacterium            | 0.0% | 0.0% | 0.0% | 0.0% | 0.0% | 0.0% | 0.0% |
| k_Bacteria;p_Firmicutes;c_Clostridia;o_Clostridiales;f_Syntrophomonadaceae;g_Syntrophomonas            | 0.0% | 0.0% | 0.0% | 0.0% | 0.0% | 0.0% | 0.0% |
| k_Bacteria;p_Firmicutes;c_Clostridia;o_Clostridiales;f_Veillonellaceae;g_                              | 0.0% | 0.0% | 0.0% | 0.0% | 0.0% | 0.0% | 0.0% |
| k_Bacteria;p_Firmicutes;c_Clostridia;o_Clostridiales;f_Veillonellaceae;g_BSV43                         | 0.0% | 0.0% | 0.0% | 0.0% | 0.0% | 0.0% | 0.0% |
| k_Bacteria;p_Firmicutes;c_Clostridia;o_Clostridiales;f_Veillonellaceae;g_G07                           | 0.0% | 0.0% | 0.0% | 0.0% | 0.0% | 0.0% | 0.0% |
| k_Bacteria;p_Firmicutes;c_Clostridia;o_Clostridiales;f_Veillonellaceae;g_Pelosinus                     | 0.0% | 0.0% | 0.0% | 0.0% | 0.0% | 0.0% | 0.0% |
| k_Bacteria;p_Firmicutes;c_Clostridia;o_Clostridiales;f_Veillonellaceae;g_Sporomusa                     | 0.0% | 0.0% | 0.0% | 0.0% | 0.0% | 0.0% | 0.0% |
| k_Bacteria;p_Firmicutes;c_Clostridia;o_Clostridiales;f_[Acidaminobacteraceae];g_Acidaminobacter        | 0.0% | 0.0% | 0.0% | 0.0% | 0.0% | 0.0% | 0.0% |
| k_Bacteria;p_Firmicutes;c_Clostridia;o_Clostridiales;f_[Acidaminobacteraceae];g_Fusibacter             | 0.0% | 0.0% | 0.0% | 0.0% | 0.0% | 0.0% | 0.0% |
| k_Bacteria;p_Firmicutes;c_Clostridia;o_Clostridiales;f_[Mogibacteriaceae];Other                        | 0.0% | 0.0% | 0.0% | 0.0% | 0.0% | 0.0% | 0.0% |
| k_Bacteria;p_Firmicutes;c_Clostridia;o_Clostridiales;f_[Mogibacteriaceae];g_                           | 0.0% | 0.0% | 0.0% | 0.0% | 0.0% | 0.0% | 0.0% |
| k_Bacteria;p_Firmicutes;c_Clostridia;o_Clostridiales;f_[Mogibacteriaceae];g_Anaerovorax                | 0.0% | 0.0% | 0.0% | 0.0% | 0.0% | 0.0% | 0.0% |
| k_Bacteria;p_Firmicutes;c_Clostridia;o_Clostridiales;f_[Tissierellaceae];g_                            | 0.0% | 0.0% | 0.0% | 0.0% | 0.0% | 0.0% | 0.0% |
| k_Bacteria;p_Firmicutes;c_Clostridia;o_Clostridiales;f_[Tissierellaceae];g_Sedimentibacter             | 0.0% | 0.0% | 0.0% | 0.0% | 0.0% | 0.0% | 0.0% |
| k_Bacteria;p_Firmicutes;c_Clostridia;o_Clostridiales;f_[Tissierellaceae];g_Sporanaerobacter            | 0.0% | 0.0% | 0.0% | 0.0% | 0.0% | 0.0% | 0.0% |
| k_Bacteria;p_Firmicutes;c_Clostridia;o_Clostridiales;f_[Tissierellaceae];g_Tepidimicrobium             | 0.0% | 0.0% | 0.0% | 0.0% | 0.0% | 0.0% | 0.0% |
| k_Bacteria;p_Firmicutes;c_Clostridia;o_Clostridiales;f_[Tissierellaceae];g_Tissierella Soehngenia      | 0.0% | 0.0% | 0.0% | 0.0% | 0.0% | 0.0% | 0.0% |
| k_Bacteria;p_Firmicutes;c_Clostridia;o_Halanaerobiales;f_g_                                            | 0.0% | 0.0% | 0.0% | 0.0% | 0.0% | 0.0% | 0.0% |
| k_Bacteria;p_Firmicutes;c_Clostridia;o_OPB54;f_g_                                                      | 0.0% | 0.0% | 0.0% | 0.0% | 0.0% | 0.0% | 0.1% |
| k_Bacteria;p_Firmicutes;c_Clostridia;o_SHA-98;f_D2;g_                                                  | 0.0% | 0.0% | 0.0% | 0.0% | 0.0% | 0.0% | 0.0% |
| k_Bacteria;p_Firmicutes;c_Clostridia;o_Thermoanaerobacterales;f_g_                                     | 0.0% | 0.0% | 0.0% | 0.0% | 0.0% | 0.0% | 0.0% |
| k_Bacteria;p_Firmicutes;c_Clostridia;o_Thermoanaerobacterales;f_Thermacetogenium                       | 0.0% | 0.0% | 0.0% | 0.0% | 0.0% | 0.0% | 0.0% |
| k_Bacteria;p_Firmicutes;c_Erysipelotrichi;o_Erysipelotrichales;f_Erysipelotrichaceae;g_                | 0.0% | 0.0% | 0.0% | 0.0% | 0.0% | 0.0% | 0.0% |
| k_Bacteria;p_Firmicutes;c_Erysipelotrichi;o_Erysipelotrichales;f_Erysipelotrichaceae;g_PSB-M-3         | 0.0% | 0.0% | 0.0% | 0.0% | 0.0% | 0.0% | 0.0% |
| k_Bacteria;p_GAL15;c_o_f_g_                                                                            | 0.4% | 0.0% | 0.2% | 0.0% | 1.5% | 0.7% | 0.0% |
| k_Bacteria;p_GN02;c_o_f_g_                                                                             | 0.0% | 0.0% | 0.0% | 0.0% | 0.0% | 0.0% | 0.0% |
| k_Bacteria;p_GN02;c_3BR-5F;o_f_g_                                                                      | 0.0% | 0.0% | 0.0% | 0.0% | 0.0% | 0.0% | 0.0% |
| k_Bacteria;p_GN02;c_BB34;o_f_g_                                                                        | 0.0% | 0.0% | 0.0% | 0.0% | 0.0% | 0.0% | 0.0% |
| k_Bacteria;p_GN02;c_BD1-5;o_f_g_                                                                       | 0.0% | 0.0% | 0.0% | 0.0% | 0.0% | 0.0% | 0.0% |
| k_Bacteria;p_GN02;c_GKS2-174;o_f_g_                                                                    | 0.0% | 0.0% | 0.1% | 0.0% | 0.0% | 0.0% | 0.0% |
| k_Bacteria;p_GN02;c_GN07;o_f_g_                                                                        | 0.0% | 0.0% | 0.0% | 0.0% | 0.1% | 0.0% | 0.0% |
| k_Bacteria;p_GN04;c_o_f_g_                                                                             | 0.0% | 0.0% | 0.2% | 0.0% | 0.0% | 0.0% | 0.0% |
| k_Bacteria;p_GN04;c_GN15;o_f_g_                                                                        | 0.0% | 0.0% | 0.1% | 0.0% | 0.0% | 0.0% | 0.0% |
| k_Bacteria;p_GN04;c_MSB-5A5;o_f_g_                                                                     | 0.0% | 0.0% | 0.0% | 0.0% | 0.0% | 0.0% | 0.0% |
| k_Bacteria;p_Gemmatimonadetes;c_o_f_g_                                                                 | 0.3% | 0.0% | 0.7% | 0.0% | 0.0% | 0.7% | 0.2% |
| k_Bacteria;p_Gemmatimonadetes;c_Gemm-1;o_f_g_                                                          | 0.7% | 0.7% | 0.8% | 0.6% | 0.2% | 1.6% | 0.5% |
| k_Bacteria;p_Gemmatimonadetes;c_Gemm-2;o_f_g_                                                          | 0.1% | 0.2% | 0.1% | 0.0% | 0.0% | 0.0% | 0.1% |
| k_Bacteria;p_Gemmatimonadetes;c_Gemm-3;o_f_g_                                                          | 0.1% | 0.5% | 0.1% | 0.0% | 0.0% | 0.0% | 0.0% |
| k_Bacteria;p_Gemmatimonadetes;c_Gemm-4;o_f_g_                                                          | 0.0% | 0.0% | 0.0% | 0.0% | 0.0% | 0.0% | 0.0% |
| k_Bacteria;p_Gemmatimonadetes;c_Gemm-5;o_f_g_                                                          | 0.2% | 0.4% | 0.3% | 0.0% | 0.0% | 0.1% | 0.3% |
| k_Bacteria;p_Gemmatimonadetes;c_Gemmatimonadetes;Other;Other;Other                                     | 0.0% | 0.0% | 0.0% | 0.0% | 0.0% | 0.0% | 0.0% |
| k_Bacteria;p_Gemmatimonadetes;c_Gemmatimonadetes;o_f_g_                                                | 0.3% | 0.1% | 1.0% | 0.1% | 0.1% | 0.6% | 0.2% |
| k_Bacteria;p_Gemmatimonadetes;c_Gemmatimonadetes;o_C114;f_g_                                           | 0.2% | 0.0% | 0.5% | 0.0% | 0.0% | 0.6% | 0.0% |
| k_Bacteria;p_Gemmatimonadetes;c_Gemmatimonadetes;o_Ellin5290;f_g_                                      | 0.0% | 0.1% | 0.0% | 0.1% | 0.0% | 0.0% | 0.0% |
| k_Bacteria;p_Gemmatimonadetes;c_Gemmatimonadetes;o_Gemmatimonadales;Other;Other                        | 0.0% | 0.0% | 0.0% | 0.0% | 0.0% | 0.0% | 0.0% |
| k_Bacteria;p_Gemmatimonadetes;c_Gemmatimonadetes;o_Gemmatimonadales;f_g_                               | 0.0% | 0.0% | 0.0% | 0.0% | 0.0% | 0.0% | 0.0% |
| k_Bacteria;p_Gemmatimonadetes;c_Gemmatimonadetes;o_Gemmatimonadales;f_Ellin5301;g_                     | 0.0% | 0.0% | 0.0% | 0.1% | 0.0% | 0.0% | 0.0% |
| k_Bacteria;p_Gemmatimonadetes;c_Gemmatimonadetes;o_Gemmatimonadales;f_Gemmatimonadaceae;g_Gemmatimonas | 0.1% | 0.0% | 0.3% | 0.1% | 0.0% | 0.1% | 0.0% |
| k_Bacteria;p_Gemmatimonadetes;c_Gemmatimonadetes;o_KD8-87;f_g_                                         | 0.0% | 0.1% | 0.1% | 0.0% | 0.0% | 0.0% | 0.0% |
| k_Bacteria;p_Gemmatimonadetes;c_Gemmatimonadetes;o_N1423WL;f_g_                                        | 0.3% | 0.0% | 1.8% | 0.0% | 0.0% | 0.3% | 0.0% |
| k_Bacteria;p_Kazan-3B-28;c_o_f_g_                                                                      | 0.0% | 0.0% | 0.0% | 0.0% | 0.0% | 0.0% | 0.0% |
| k_Bacteria;p_Lentisphaerae;c_[Lentisphaeria];o_Lentisphaerales;f_Arctic95B-10;g_                       | 0.0% | 0.0% | 0.0% | 0.0% | 0.0% | 0.0% | 0.0% |
| k_Bacteria;p_Lentisphaerae;c_[Lentisphaeria];o_Victivallales;f_Victivallaceae;g_                       | 0.0% | 0.0% | 0.0% | 0.0% | 0.0% | 0.0% | 0.0% |
| k_Bacteria;p_MVP-21;c_o_f_g_                                                                           | 0.0% | 0.0% | 0.0% | 0.0% | 0.0% | 0.0% | 0.0% |
| k_Bacteria;p_NC10;c_12-24;Other;Other;Other                                                            | 0.0% | 0.0% | 0.0% | 0.0% | 0.0% | 0.0% | 0.0% |
| k_Bacteria;p_NC10;c_12-24;o_JH-WHS47;f_g_                                                              | 0.0% | 0.0% | 0.0% | 0.0% | 0.0% | 0.0% | 0.1% |
| k_Bacteria;p_NC10;c_12-24;o_Methylomirabiales;f_Methylomirabiliaceae;g_Candidatus Methylomirabilis     | 0.0% | 0.0% | 0.0% | 0.0% | 0.0% | 0.0% | 0.0% |
| k_Bacteria;p_NC10;c_wb1-A12;o_f_g_                                                                     | 0.0% | 0.0% | 0.0% | 0.0% | 0.0% | 0.0% | 0.0% |
| k_Bacteria;p_NKB19;Other;Other;Other;Other                                                             | 0.0% | 0.0% | 0.0% | 0.0% | 0.0% | 0.0% | 0.0% |
| k_Bacteria;p_NKB19;c_o_f_g_                                                                            | 0.0% | 0.0% | 0.1% | 0.0% | 0.0% | 0.0% | 0.0% |
| k_Bacteria;p_NKB19;c_TSBW08;o_f_g_                                                                     | 0.0% | 0.0% | 0.0% | 0.0% | 0.0% | 0.0% | 0.0% |
| k_Bacteria;p_Nitrospirae;c_Nitrospira;o_Nitrospirales;f_g_                                             | 0.0% | 0.0% | 0.0% | 0.0% | 0.0% | 0.0% | 0.1% |
| k_Bacteria;p_Nitrospirae;c_Nitrospira;o_Nitrospirales;f_0319-6A21;g_                                   | 0.6% | 0.1% | 0.5% | 0.7% | 0.3% | 1.1% | 1.1% |

|                                                                                                         |      |      |      |      |      |      |      |
|---------------------------------------------------------------------------------------------------------|------|------|------|------|------|------|------|
| k_Bacteria;p__Nitrospirae;c__Nitrospira;o__Nitrospirales;f__FW;g_4-29                                   | 0.0% | 0.0% | 0.0% | 0.0% | 0.0% | 0.0% | 0.2% |
| k_Bacteria;p__Nitrospirae;c__Nitrospira;o__Nitrospirales;f__Nitrospiraceae;Other                        | 0.0% | 0.0% | 0.0% | 0.0% | 0.0% | 0.0% | 0.0% |
| k_Bacteria;p__Nitrospirae;c__Nitrospira;o__Nitrospirales;f__Nitrospiraceae;g__                          | 1.6% | 0.0% | 3.1% | 0.1% | 4.6% | 2.0% | 0.0% |
| k_Bacteria;p__Nitrospirae;c__Nitrospira;o__Nitrospirales;f__Nitrospiraceae;g_JG37-AG-70                 | 0.0% | 0.0% | 0.0% | 0.0% | 0.0% | 0.0% | 0.0% |
| k_Bacteria;p__Nitrospirae;c__Nitrospira;o__Nitrospirales;f__Nitrospiraceae;g_Nitrospira                 | 3.6% | 0.8% | 6.0% | 1.5% | 9.5% | 2.0% | 2.0% |
| k_Bacteria;p__Nitrospirae;c__Nitrospira;o__Nitrospirales;f__(Leptospirillaceae);g__                     | 0.0% | 0.0% | 0.0% | 0.0% | 0.0% | 0.0% | 0.0% |
| k_Bacteria;p__Nitrospirae;c__Nitrospira;o__Nitrospirales;f__(Thermodesulfobionaceae);g__                | 0.0% | 0.0% | 0.0% | 0.0% | 0.0% | 0.0% | 0.1% |
| k_Bacteria;p__Nitrospirae;c__Nitrospira;o__Nitrospirales;f__(Thermodesulfobionaceae);g_GOUTA19          | 0.0% | 0.0% | 0.0% | 0.0% | 0.0% | 0.0% | 0.1% |
| k_Bacteria;p__Nitrospirae;c__Nitrospira;o__Nitrospirales;f__(Thermodesulfobionaceae);g_HB118            | 0.0% | 0.0% | 0.0% | 0.0% | 0.0% | 0.0% | 0.0% |
| k_Bacteria;p__OD1;c__o__f__g__                                                                          | 0.0% | 0.1% | 0.1% | 0.0% | 0.0% | 0.0% | 0.0% |
| k_Bacteria;p__OD1;c__ABY1;o__f__g__                                                                     | 0.1% | 0.0% | 0.0% | 0.0% | 0.2% | 0.1% | 0.0% |
| k_Bacteria;p__OD1;c__Mb-NB09;o__f__g__                                                                  | 0.0% | 0.0% | 0.0% | 0.0% | 0.0% | 0.0% | 0.0% |
| k_Bacteria;p__OD1;c__SM2F11;o__f__g__                                                                   | 0.2% | 0.1% | 0.2% | 0.1% | 0.2% | 0.1% | 0.2% |
| k_Bacteria;p__OD1;c__ZB2;o__f__g__                                                                      | 0.1% | 0.1% | 0.1% | 0.0% | 0.0% | 0.0% | 0.0% |
| k_Bacteria;p__OP1;c__[Acetothermia];o__[Acetothermales];f__g__                                          | 0.0% | 0.0% | 0.0% | 0.0% | 0.0% | 0.0% | 0.0% |
| k_Bacteria;p__OP11;c__o__f__g__                                                                         | 0.0% | 0.0% | 0.0% | 0.0% | 0.0% | 0.0% | 0.0% |
| k_Bacteria;p__OP11;c__OP11-3;o__f__g__                                                                  | 0.0% | 0.0% | 0.0% | 0.0% | 0.0% | 0.0% | 0.0% |
| k_Bacteria;p__OP11;c__OP11-4;o__f__g__                                                                  | 0.0% | 0.0% | 0.0% | 0.0% | 0.1% | 0.0% | 0.0% |
| k_Bacteria;p__OP11;c__WCHB1-64;o__f__g__                                                                | 0.0% | 0.0% | 0.0% | 0.0% | 0.0% | 0.0% | 0.0% |
| k_Bacteria;p__OP11;c__WCHB1-64;o__K2-4-19;f__g__                                                        | 0.0% | 0.0% | 0.0% | 0.0% | 0.0% | 0.0% | 0.0% |
| k_Bacteria;p__OP11;c__WCHB1-64;o__d153;f__g__                                                           | 0.0% | 0.0% | 0.0% | 0.0% | 0.0% | 0.0% | 0.0% |
| k_Bacteria;p__OP3;c__o__f__g__                                                                          | 0.0% | 0.0% | 0.0% | 0.0% | 0.0% | 0.0% | 0.0% |
| k_Bacteria;p__OP3;c__PBS-25;o__f__g__                                                                   | 0.0% | 0.0% | 0.0% | 0.0% | 0.0% | 0.0% | 0.0% |
| k_Bacteria;p__OP3;c__kol11;o__f__g__                                                                    | 0.0% | 0.0% | 0.1% | 0.0% | 0.0% | 0.1% | 0.0% |
| k_Bacteria;p__OP3;c__kol11;o__GIF10;f__g__                                                              | 0.0% | 0.0% | 0.0% | 0.0% | 0.0% | 0.0% | 0.0% |
| k_Bacteria;p__OP3;c__kol11;o__GIF10;f__kpj58rc;g__                                                      | 0.0% | 0.0% | 0.0% | 0.0% | 0.0% | 0.0% | 0.0% |
| k_Bacteria;p__Planctomycetes;c__o__f__g__                                                               | 0.0% | 0.0% | 0.0% | 0.0% | 0.0% | 0.0% | 0.0% |
| k_Bacteria;p__Planctomycetes;c__028H05-P-BN-P5;o__f__g__                                                | 0.0% | 0.0% | 0.0% | 0.0% | 0.0% | 0.0% | 0.0% |
| k_Bacteria;p__Planctomycetes;c__BD7-11;o__f__g__                                                        | 0.0% | 0.0% | 0.1% | 0.0% | 0.0% | 0.1% | 0.0% |
| k_Bacteria;p__Planctomycetes;c__C6;o__MVS-107;f__g__                                                    | 0.0% | 0.0% | 0.0% | 0.0% | 0.0% | 0.0% | 0.0% |
| k_Bacteria;p__Planctomycetes;c__C6;o__Ucm1571;f__g__                                                    | 0.0% | 0.0% | 0.0% | 0.0% | 0.0% | 0.0% | 0.0% |
| k_Bacteria;p__Planctomycetes;c__C6;o__d113;f__g__                                                       | 0.0% | 0.0% | 0.0% | 0.0% | 0.0% | 0.0% | 0.0% |
| k_Bacteria;p__Planctomycetes;c__ODP123;o__T8-B82;f__g__                                                 | 0.0% | 0.0% | 0.0% | 0.0% | 0.0% | 0.0% | 0.0% |
| k_Bacteria;p__Planctomycetes;c__OM190;o__f__g__                                                         | 0.0% | 0.0% | 0.0% | 0.0% | 0.0% | 0.0% | 0.0% |
| k_Bacteria;p__Planctomycetes;c__OM190;o__CL500-15;f__g__                                                | 0.0% | 0.1% | 0.0% | 0.0% | 0.0% | 0.0% | 0.0% |
| k_Bacteria;p__Planctomycetes;c__OM190;o__agg27;f__g__                                                   | 0.1% | 0.1% | 0.1% | 0.1% | 0.0% | 0.1% | 0.1% |
| k_Bacteria;p__Planctomycetes;c__Phycisphaerae;o__AKAU3564;f__g__                                        | 0.0% | 0.0% | 0.0% | 0.0% | 0.0% | 0.0% | 0.0% |
| k_Bacteria;p__Planctomycetes;c__Phycisphaerae;o__CCM11a;f__g__                                          | 0.0% | 0.0% | 0.2% | 0.0% | 0.0% | 0.0% | 0.0% |
| k_Bacteria;p__Planctomycetes;c__Phycisphaerae;o__Phycisphaerales;f__g__                                 | 0.3% | 0.4% | 0.3% | 0.4% | 0.0% | 0.3% | 0.2% |
| k_Bacteria;p__Planctomycetes;c__Phycisphaerae;o__Phycisphaerales;f__Phycisphaeraeae;g__                 | 0.0% | 0.0% | 0.0% | 0.0% | 0.0% | 0.0% | 0.0% |
| k_Bacteria;p__Planctomycetes;c__Phycisphaerae;o__Pla1;f__g__                                            | 0.0% | 0.0% | 0.0% | 0.0% | 0.0% | 0.0% | 0.0% |
| k_Bacteria;p__Planctomycetes;c__Phycisphaerae;o__S-70;f__g__                                            | 0.0% | 0.0% | 0.0% | 0.0% | 0.0% | 0.0% | 0.0% |
| k_Bacteria;p__Planctomycetes;c__Phycisphaerae;o__WD2101;f__g__                                          | 0.0% | 0.0% | 0.0% | 0.0% | 0.0% | 0.0% | 0.0% |
| k_Bacteria;p__Planctomycetes;c__Phycisphaerae;o__mle1-8;f__g__                                          | 0.0% | 0.0% | 0.0% | 0.0% | 0.0% | 0.0% | 0.0% |
| k_Bacteria;p__Planctomycetes;c__Pla3;o__f__g__                                                          | 0.0% | 0.0% | 0.0% | 0.0% | 0.0% | 0.1% | 0.0% |
| k_Bacteria;p__Planctomycetes;c__Pla4;o__f__g__                                                          | 0.0% | 0.0% | 0.0% | 0.0% | 0.0% | 0.0% | 0.0% |
| k_Bacteria;p__Planctomycetes;c__Planctomycetia;o__f__g__                                                | 0.0% | 0.0% | 0.0% | 0.0% | 0.0% | 0.0% | 0.0% |
| k_Bacteria;p__Planctomycetes;c__Planctomycetia;o__B97;f__g__                                            | 0.0% | 0.0% | 0.0% | 0.1% | 0.0% | 0.0% | 0.0% |
| k_Bacteria;p__Planctomycetes;c__Planctomycetia;o__Gemmatales;f__Gemmataceae;Other                       | 0.0% | 0.0% | 0.0% | 0.0% | 0.0% | 0.0% | 0.0% |
| k_Bacteria;p__Planctomycetes;c__Planctomycetia;o__Gemmatales;f__Gemmataceae;g__                         | 1.0% | 0.2% | 0.6% | 0.9% | 2.8% | 0.7% | 0.8% |
| k_Bacteria;p__Planctomycetes;c__Planctomycetia;o__Gemmatales;f__Gemmataceae;g_Gemmata                   | 0.1% | 0.1% | 0.1% | 0.2% | 0.0% | 0.0% | 0.1% |
| k_Bacteria;p__Planctomycetes;c__Planctomycetia;o__Gemmatales;f__Isosphaeraeae;g__                       | 0.0% | 0.0% | 0.0% | 0.1% | 0.0% | 0.0% | 0.0% |
| k_Bacteria;p__Planctomycetes;c__Planctomycetia;o__Gemmatales;f__Isosphaeraeae;g_Isosphaera              | 0.0% | 0.0% | 0.0% | 0.0% | 0.0% | 0.0% | 0.0% |
| k_Bacteria;p__Planctomycetes;c__Planctomycetia;o__Pirellulales;f__Pirellulaceae;Other                   | 0.0% | 0.0% | 0.0% | 0.0% | 0.0% | 0.0% | 0.0% |
| k_Bacteria;p__Planctomycetes;c__Planctomycetia;o__Pirellulales;f__Pirellulaceae;g__                     | 0.1% | 0.2% | 0.1% | 0.2% | 0.0% | 0.1% | 0.2% |
| k_Bacteria;p__Planctomycetes;c__Planctomycetia;o__Pirellulales;f__Pirellulaceae;g_A17                   | 0.0% | 0.0% | 0.0% | 0.0% | 0.0% | 0.0% | 0.0% |
| k_Bacteria;p__Planctomycetes;c__Planctomycetia;o__Pirellulales;f__Pirellulaceae;g_Pirellula             | 0.0% | 0.0% | 0.0% | 0.1% | 0.0% | 0.0% | 0.1% |
| k_Bacteria;p__Planctomycetes;c__Planctomycetia;o__Planctomycetiales;f__Planctomycetaceae;g_Planctomyces | 0.0% | 0.1% | 0.0% | 0.1% | 0.0% | 0.0% | 0.0% |
| k_Bacteria;p__Planctomycetes;c__[Brocadia];o__Brocadiales;f__Brocadiaaceae;g_Candidatus Brocadia        | 0.0% | 0.0% | 0.0% | 0.0% | 0.0% | 0.0% | 0.0% |
| k_Bacteria;p__Planctomycetes;c__vadinHA49;o__DH61;f__g__                                                | 0.0% | 0.0% | 0.0% | 0.0% | 0.0% | 0.0% | 0.0% |
| k_Bacteria;p__Planctomycetes;c__vadinHA49;o__PHOS-HE93;f__g__                                           | 0.0% | 0.0% | 0.0% | 0.0% | 0.0% | 0.0% | 0.0% |
| k_Bacteria;p__Planctomycetes;c__vadinHA49;o__p04_C01;f__g__                                             | 0.0% | 0.0% | 0.0% | 0.0% | 0.0% | 0.0% | 0.0% |
| k_Bacteria;p__Proteobacteria;Other;Other;Other;Other                                                    | 0.0% | 0.0% | 0.0% | 0.0% | 0.0% | 0.0% | 0.0% |
| k_Bacteria;p__Proteobacteria;c__o__f__g__                                                               | 0.0% | 0.0% | 0.0% | 0.0% | 0.0% | 0.0% | 0.0% |
| k_Bacteria;p__Proteobacteria;c__Alphaproteobacteria;Other;Other;Other                                   | 0.0% | 0.0% | 0.0% | 0.0% | 0.0% | 0.0% | 0.0% |
| k_Bacteria;p__Proteobacteria;c__Alphaproteobacteria;o__f__g__                                           | 0.4% | 1.1% | 0.5% | 0.4% | 0.0% | 0.1% | 0.0% |
| k_Bacteria;p__Proteobacteria;c__Alphaproteobacteria;o__BD7-3;f__g__                                     | 0.1% | 0.2% | 0.1% | 0.1% | 0.0% | 0.0% | 0.0% |



|                                                                                                             |      |      |      |      |      |      |      |
|-------------------------------------------------------------------------------------------------------------|------|------|------|------|------|------|------|
| k_Bacteria;p_Proteobacteria;c_Alphaproteobacteria;o_Rhodospirillales;Other;Other                            | 0.0% | 0.0% | 0.0% | 0.0% | 0.0% | 0.0% | 0.0% |
| k_Bacteria;p_Proteobacteria;c_Alphaproteobacteria;o_Rhodospirillales;f_g_                                   | 0.3% | 1.3% | 0.0% | 0.1% | 0.0% | 0.2% | 0.2% |
| k_Bacteria;p_Proteobacteria;c_Alphaproteobacteria;o_Rhodospirillales;f_Acetobacteraceae;Other               | 0.0% | 0.0% | 0.0% | 0.0% | 0.0% | 0.0% | 0.0% |
| k_Bacteria;p_Proteobacteria;c_Alphaproteobacteria;o_Rhodospirillales;f_Acetobacteraceae;g_Roseococcus       | 0.1% | 0.0% | 0.0% | 0.3% | 0.4% | 0.0% | 0.0% |
| k_Bacteria;p_Proteobacteria;c_Alphaproteobacteria;o_Rhodospirillales;f_Acetobacteraceae;g_Roseococcus       | 0.0% | 0.0% | 0.0% | 0.0% | 0.0% | 0.0% | 0.0% |
| k_Bacteria;p_Proteobacteria;c_Alphaproteobacteria;o_Rhodospirillales;f_Rhodospirillaceae;Other              | 0.0% | 0.0% | 0.0% | 0.0% | 0.0% | 0.0% | 0.0% |
| k_Bacteria;p_Proteobacteria;c_Alphaproteobacteria;o_Rhodospirillales;f_Rhodospirillaceae;g_                 | 2.2% | 3.1% | 0.7% | 2.5% | 4.0% | 0.8% | 2.3% |
| k_Bacteria;p_Proteobacteria;c_Alphaproteobacteria;o_Rhodospirillales;f_Rhodospirillaceae;g_Azospirillum     | 0.0% | 0.0% | 0.0% | 0.0% | 0.0% | 0.0% | 0.0% |
| k_Bacteria;p_Proteobacteria;c_Alphaproteobacteria;o_Rhodospirillales;f_Rhodospirillaceae;g_Inquilinus       | 0.0% | 0.0% | 0.0% | 0.0% | 0.0% | 0.0% | 0.0% |
| k_Bacteria;p_Proteobacteria;c_Alphaproteobacteria;o_Rhodospirillales;f_Rhodospirillaceae;g_Magnetospirillum | 0.0% | 0.0% | 0.0% | 0.0% | 0.0% | 0.0% | 0.0% |
| k_Bacteria;p_Proteobacteria;c_Alphaproteobacteria;o_Rhodospirillales;f_Rhodospirillaceae;g_Phaeospirillum   | 0.0% | 0.0% | 0.0% | 0.0% | 0.0% | 0.0% | 0.0% |
| k_Bacteria;p_Proteobacteria;c_Alphaproteobacteria;o_Rhodospirillales;f_Rhodospirillaceae;g_Rhodovibrio      | 0.0% | 0.0% | 0.0% | 0.0% | 0.0% | 0.0% | 0.0% |
| k_Bacteria;p_Proteobacteria;c_Alphaproteobacteria;o_Rhodospirillales;f_Rhodospirillaceae;g_Skermanella      | 0.0% | 0.0% | 0.0% | 0.0% | 0.0% | 0.0% | 0.0% |
| k_Bacteria;p_Proteobacteria;c_Alphaproteobacteria;o_Rhodospirillales;f_Rhodospirillaceae;g_Telmatospirillum | 0.0% | 0.0% | 0.0% | 0.0% | 0.0% | 0.0% | 0.0% |
| k_Bacteria;p_Proteobacteria;c_Alphaproteobacteria;o_Rickettsiales;f_g_                                      | 0.1% | 0.0% | 0.1% | 0.1% | 0.1% | 0.0% | 0.1% |
| k_Bacteria;p_Proteobacteria;c_Alphaproteobacteria;o_Rickettsiales;f_Holosporaceae;g_                        | 0.0% | 0.0% | 0.0% | 0.0% | 0.0% | 0.0% | 0.0% |
| k_Bacteria;p_Proteobacteria;c_Alphaproteobacteria;o_Rickettsiales;f_Rickettsiaceae;g_                       | 0.0% | 0.0% | 0.0% | 0.0% | 0.0% | 0.0% | 0.0% |
| k_Bacteria;p_Proteobacteria;c_Alphaproteobacteria;o_Rickettsiales;f_Rickettsiaceae;g_Orientia               | 0.0% | 0.0% | 0.0% | 0.0% | 0.0% | 0.0% | 0.0% |
| k_Bacteria;p_Proteobacteria;c_Alphaproteobacteria;o_Rickettsiales;f_Rickettsiaceae;g_Rickettsia             | 0.0% | 0.0% | 0.0% | 0.0% | 0.0% | 0.0% | 0.0% |
| k_Bacteria;p_Proteobacteria;c_Alphaproteobacteria;o_Rickettsiales;f_mitochondria;Other                      | 0.0% | 0.0% | 0.0% | 0.0% | 0.0% | 0.0% | 0.0% |
| k_Bacteria;p_Proteobacteria;c_Alphaproteobacteria;o_Rickettsiales;f_mitochondria;g_                         | 0.0% | 0.0% | 0.0% | 0.0% | 0.0% | 0.0% | 0.0% |
| k_Bacteria;p_Proteobacteria;c_Alphaproteobacteria;o_Sphingomonadales;Other;Other                            | 0.0% | 0.0% | 0.0% | 0.0% | 0.0% | 0.0% | 0.0% |
| k_Bacteria;p_Proteobacteria;c_Alphaproteobacteria;o_Sphingomonadales;f_g_                                   | 0.0% | 0.0% | 0.1% | 0.0% | 0.0% | 0.0% | 0.0% |
| k_Bacteria;p_Proteobacteria;c_Alphaproteobacteria;o_Sphingomonadales;f_Erythrobacteraceae;Other             | 0.0% | 0.0% | 0.0% | 0.0% | 0.0% | 0.0% | 0.0% |
| k_Bacteria;p_Proteobacteria;c_Alphaproteobacteria;o_Sphingomonadales;f_Erythrobacteraceae;g_                | 0.1% | 0.2% | 0.2% | 0.2% | 0.0% | 0.0% | 0.1% |
| k_Bacteria;p_Proteobacteria;c_Alphaproteobacteria;o_Sphingomonadales;f_Erythrobacteraceae;g_Lutibacterium   | 0.0% | 0.0% | 0.0% | 0.0% | 0.0% | 0.0% | 0.0% |
| k_Bacteria;p_Proteobacteria;c_Alphaproteobacteria;o_Sphingomonadales;f_Sphingomonadaceae;Other              | 0.0% | 0.0% | 0.1% | 0.0% | 0.0% | 0.0% | 0.0% |
| k_Bacteria;p_Proteobacteria;c_Alphaproteobacteria;o_Sphingomonadales;f_Sphingomonadaceae;g_                 | 0.4% | 0.7% | 0.5% | 0.5% | 0.0% | 0.3% | 0.1% |
| k_Bacteria;p_Proteobacteria;c_Alphaproteobacteria;o_Sphingomonadales;f_Sphingomonadaceae;g_Blastomonas      | 0.0% | 0.0% | 0.0% | 0.0% | 0.0% | 0.0% | 0.0% |
| k_Bacteria;p_Proteobacteria;c_Alphaproteobacteria;o_Sphingomonadales;f_Sphingomonadaceae;g_Kaistobacter     | 1.4% | 0.9% | 5.8% | 0.8% | 0.0% | 0.6% | 0.5% |
| k_Bacteria;p_Proteobacteria;c_Alphaproteobacteria;o_Sphingomonadales;f_Sphingomonadaceae;g_Novosphingobium  | 0.1% | 0.0% | 0.2% | 0.2% | 0.0% | 0.0% | 0.0% |
| k_Bacteria;p_Proteobacteria;c_Alphaproteobacteria;o_Sphingomonadales;f_Sphingomonadaceae;g_Sphingobium      | 0.0% | 0.0% | 0.0% | 0.1% | 0.0% | 0.0% | 0.0% |
| k_Bacteria;p_Proteobacteria;c_Alphaproteobacteria;o_Sphingomonadales;f_Sphingomonadaceae;g_Sphingomonas     | 0.1% | 0.1% | 0.4% | 0.2% | 0.0% | 0.0% | 0.0% |
| k_Bacteria;p_Proteobacteria;c_Alphaproteobacteria;o_Sphingomonadales;f_Sphingomonadaceae;g_Sphingopyxis     | 0.0% | 0.0% | 0.0% | 0.0% | 0.0% | 0.0% | 0.0% |
| k_Bacteria;p_Proteobacteria;c_Betaproteobacteria;Other;Other;Other                                          | 0.0% | 0.0% | 0.0% | 0.0% | 0.2% | 0.0% | 0.0% |
| k_Bacteria;p_Proteobacteria;c_Betaproteobacteria;o_f_g_                                                     | 1.4% | 1.2% | 1.3% | 1.8% | 0.0% | 1.8% | 2.3% |
| k_Bacteria;p_Proteobacteria;c_Betaproteobacteria;o_A21b;f_EB1003;g_                                         | 0.0% | 0.0% | 0.0% | 0.0% | 0.0% | 0.0% | 0.0% |
| k_Bacteria;p_Proteobacteria;c_Betaproteobacteria;o_A21b;f_UD5;g_                                            | 0.0% | 0.0% | 0.1% | 0.0% | 0.0% | 0.0% | 0.0% |
| k_Bacteria;p_Proteobacteria;c_Betaproteobacteria;o_Burkholderiales;Other;Other                              | 0.0% | 0.0% | 0.0% | 0.0% | 0.0% | 0.0% | 0.0% |
| k_Bacteria;p_Proteobacteria;c_Betaproteobacteria;o_Burkholderiales;f_g_                                     | 0.0% | 0.0% | 0.0% | 0.0% | 0.0% | 0.0% | 0.0% |
| k_Bacteria;p_Proteobacteria;c_Betaproteobacteria;o_Burkholderiales;f_Alcaligenaceae;Other                   | 0.0% | 0.0% | 0.0% | 0.0% | 0.0% | 0.0% | 0.0% |
| k_Bacteria;p_Proteobacteria;c_Betaproteobacteria;o_Burkholderiales;f_Alcaligenaceae;g_                      | 0.2% | 0.1% | 0.4% | 0.1% | 0.0% | 0.1% | 0.6% |
| k_Bacteria;p_Proteobacteria;c_Betaproteobacteria;o_Burkholderiales;f_Alcaligenaceae;g_Achromobacter         | 0.0% | 0.0% | 0.0% | 0.0% | 0.0% | 0.0% | 0.0% |
| k_Bacteria;p_Proteobacteria;c_Betaproteobacteria;o_Burkholderiales;f_Alcaligenaceae;g_Tetrathibacter        | 0.0% | 0.0% | 0.0% | 0.0% | 0.0% | 0.0% | 0.0% |
| k_Bacteria;p_Proteobacteria;c_Betaproteobacteria;o_Burkholderiales;f_Burkholderiaceae;Other                 | 0.0% | 0.0% | 0.0% | 0.0% | 0.0% | 0.0% | 0.0% |
| k_Bacteria;p_Proteobacteria;c_Betaproteobacteria;o_Burkholderiales;f_Burkholderiaceae;g_                    | 0.0% | 0.0% | 0.0% | 0.0% | 0.0% | 0.0% | 0.0% |
| k_Bacteria;p_Proteobacteria;c_Betaproteobacteria;o_Burkholderiales;f_Burkholderiaceae;g_Burkholderia        | 0.0% | 0.0% | 0.0% | 0.0% | 0.0% | 0.0% | 0.0% |
| k_Bacteria;p_Proteobacteria;c_Betaproteobacteria;o_Burkholderiales;f_Burkholderiaceae;g_Lautropia           | 0.0% | 0.0% | 0.0% | 0.0% | 0.0% | 0.0% | 0.0% |
| k_Bacteria;p_Proteobacteria;c_Betaproteobacteria;o_Burkholderiales;f_Burkholderiaceae;g_Pandoraea           | 0.0% | 0.0% | 0.0% | 0.0% | 0.0% | 0.0% | 0.0% |
| k_Bacteria;p_Proteobacteria;c_Betaproteobacteria;o_Burkholderiales;f_Comamonadaceae;Other                   | 0.1% | 0.1% | 0.1% | 0.2% | 0.0% | 0.1% | 0.1% |
| k_Bacteria;p_Proteobacteria;c_Betaproteobacteria;o_Burkholderiales;f_Comamonadaceae;g_                      | 0.3% | 0.2% | 0.5% | 0.5% | 0.1% | 0.1% | 0.1% |
| k_Bacteria;p_Proteobacteria;c_Betaproteobacteria;o_Burkholderiales;f_Comamonadaceae;g_Acidovorax            | 0.0% | 0.0% | 0.0% | 0.0% | 0.0% | 0.0% | 0.0% |
| k_Bacteria;p_Proteobacteria;c_Betaproteobacteria;o_Burkholderiales;f_Comamonadaceae;g_Azohydromonas         | 0.0% | 0.0% | 0.0% | 0.0% | 0.0% | 0.0% | 0.0% |
| k_Bacteria;p_Proteobacteria;c_Betaproteobacteria;o_Burkholderiales;f_Comamonadaceae;g_Comamonas             | 0.0% | 0.0% | 0.0% | 0.0% | 0.0% | 0.0% | 0.0% |
| k_Bacteria;p_Proteobacteria;c_Betaproteobacteria;o_Burkholderiales;f_Comamonadaceae;g_Delftia               | 0.0% | 0.0% | 0.0% | 0.0% | 0.0% | 0.0% | 0.0% |
| k_Bacteria;p_Proteobacteria;c_Betaproteobacteria;o_Burkholderiales;f_Comamonadaceae;g_Hydrogenophaga        | 0.0% | 0.0% | 0.0% | 0.0% | 0.0% | 0.0% | 0.0% |
| k_Bacteria;p_Proteobacteria;c_Betaproteobacteria;o_Burkholderiales;f_Comamonadaceae;g_Hylemonella           | 0.0% | 0.0% | 0.0% | 0.0% | 0.0% | 0.0% | 0.0% |
| k_Bacteria;p_Proteobacteria;c_Betaproteobacteria;o_Burkholderiales;f_Comamonadaceae;g_Leptothrix            | 0.0% | 0.0% | 0.0% | 0.0% | 0.0% | 0.0% | 0.0% |
| k_Bacteria;p_Proteobacteria;c_Betaproteobacteria;o_Burkholderiales;f_Comamonadaceae;g_Limnobacter           | 0.0% | 0.0% | 0.0% | 0.0% | 0.0% | 0.0% | 0.0% |
| k_Bacteria;p_Proteobacteria;c_Betaproteobacteria;o_Burkholderiales;f_Comamonadaceae;g_Limnohabitans         | 0.0% | 0.0% | 0.0% | 0.0% | 0.0% | 0.0% | 0.0% |
| k_Bacteria;p_Proteobacteria;c_Betaproteobacteria;o_Burkholderiales;f_Comamonadaceae;g_Methylibium           | 0.0% | 0.0% | 0.1% | 0.1% | 0.0% | 0.0% | 0.0% |
| k_Bacteria;p_Proteobacteria;c_Betaproteobacteria;o_Burkholderiales;f_Comamonadaceae;g_Polaromonas           | 0.0% | 0.0% | 0.0% | 0.0% | 0.0% | 0.0% | 0.0% |
| k_Bacteria;p_Proteobacteria;c_Betaproteobacteria;o_Burkholderiales;f_Comamonadaceae;g_Ramlibacter           | 0.1% | 0.1% | 0.2% | 0.1% | 0.0% | 0.0% | 0.0% |
| k_Bacteria;p_Proteobacteria;c_Betaproteobacteria;o_Burkholderiales;f_Comamonadaceae;g_Rhodoferax            | 0.1% | 0.0% | 0.1% | 0.0% | 0.1% | 0.1% | 0.0% |
| k_Bacteria;p_Proteobacteria;c_Betaproteobacteria;o_Burkholderiales;f_Comamonadaceae;g_Roseateae             | 0.0% | 0.0% | 0.0% | 0.0% | 0.0% | 0.0% | 0.0% |
| k_Bacteria;p_Proteobacteria;c_Betaproteobacteria;o_Burkholderiales;f_Comamonadaceae;g_Rubrivivax            | 0.0% | 0.0% | 0.0% | 0.0% | 0.0% | 0.0% | 0.0% |
| k_Bacteria;p_Proteobacteria;c_Betaproteobacteria;o_Burkholderiales;f_Comamonadaceae;g_Simplicispira         | 0.0% | 0.0% | 0.0% | 0.0% | 0.0% | 0.0% | 0.0% |



|                                                                                                                   |      |      |      |      |      |      |
|-------------------------------------------------------------------------------------------------------------------|------|------|------|------|------|------|
| k_Bacteria:p__Proteobacteria;c__Betaproteobacteria;o__Burkholderiales;f__Comamonadaceae;g__Tepidimonas            | 0.0% | 0.0% | 0.0% | 0.0% | 0.0% | 0.0% |
| k_Bacteria:p__Proteobacteria;c__Betaproteobacteria;o__Burkholderiales;f__Comamonadaceae;g__Variovorax             | 0.0% | 0.0% | 0.0% | 0.0% | 0.0% | 0.0% |
| k_Bacteria:p__Proteobacteria;c__Betaproteobacteria;o__Burkholderiales;f__Oxalobacteraceae;Other                   | 0.0% | 0.0% | 0.0% | 0.0% | 0.1% | 0.0% |
| k_Bacteria:p__Proteobacteria;c__Betaproteobacteria;o__Burkholderiales;f__Oxalobacteraceae;g__                     | 0.4% | 0.1% | 0.5% | 0.6% | 0.6% | 0.3% |
| k_Bacteria:p__Proteobacteria;c__Betaproteobacteria;o__Burkholderiales;f__Oxalobacteraceae;g__Cupriavidus          | 0.0% | 0.0% | 0.0% | 0.0% | 0.0% | 0.0% |
| k_Bacteria:p__Proteobacteria;c__Betaproteobacteria;o__Burkholderiales;f__Oxalobacteraceae;g__Janthinobacterium    | 0.2% | 0.0% | 0.4% | 0.4% | 0.0% | 0.1% |
| k_Bacteria:p__Proteobacteria;c__Betaproteobacteria;o__Burkholderiales;f__Oxalobacteraceae;g__Oxalobacter          | 0.0% | 0.0% | 0.0% | 0.0% | 0.0% | 0.0% |
| k_Bacteria:p__Proteobacteria;c__Betaproteobacteria;o__Burkholderiales;f__Oxalobacteraceae;g__Ralstonia            | 0.0% | 0.0% | 0.0% | 0.0% | 0.0% | 0.0% |
| k_Bacteria:p__Proteobacteria;c__Betaproteobacteria;o__Ellin6067;f__g__                                            | 0.3% | 0.2% | 0.4% | 0.5% | 0.0% | 0.2% |
| k_Bacteria:p__Proteobacteria;c__Betaproteobacteria;o__Gallionellales;f__Gallionellaceae;g__Gallionella            | 0.0% | 0.0% | 0.0% | 0.0% | 0.0% | 0.1% |
| k_Bacteria:p__Proteobacteria;c__Betaproteobacteria;o__Hydrogenophilales;f__Hydrogenophilaceae;g__Thiobacillus     | 0.0% | 0.0% | 0.0% | 0.0% | 0.0% | 0.0% |
| k_Bacteria:p__Proteobacteria;c__Betaproteobacteria;o__IS-44;f__g__                                                | 0.1% | 0.2% | 0.1% | 0.4% | 0.0% | 0.1% |
| k_Bacteria:p__Proteobacteria;c__Betaproteobacteria;o__MND1;f__g__                                                 | 0.6% | 0.4% | 0.7% | 0.3% | 0.0% | 0.5% |
| k_Bacteria:p__Proteobacteria;c__Betaproteobacteria;o__Methylophilales;Other;Other                                 | 0.0% | 0.0% | 0.0% | 0.0% | 0.0% | 0.0% |
| k_Bacteria:p__Proteobacteria;c__Betaproteobacteria;o__Methylophilales;f__g__                                      | 0.0% | 0.0% | 0.0% | 0.0% | 0.0% | 0.0% |
| k_Bacteria:p__Proteobacteria;c__Betaproteobacteria;o__Methylophilales;f__Methylophilaceae;Other                   | 0.0% | 0.0% | 0.0% | 0.0% | 0.0% | 0.0% |
| k_Bacteria:p__Proteobacteria;c__Betaproteobacteria;o__Methylophilales;f__Methylophilaceae;g__                     | 0.1% | 0.0% | 0.1% | 0.0% | 0.2% | 0.0% |
| k_Bacteria:p__Proteobacteria;c__Betaproteobacteria;o__Methylophilales;f__Methylophilaceae;g__Methylothera         | 0.0% | 0.0% | 0.1% | 0.0% | 0.0% | 0.0% |
| k_Bacteria:p__Proteobacteria;c__Betaproteobacteria;o__Neisseriales;f__Neisseriaceae;Other                         | 0.0% | 0.0% | 0.0% | 0.0% | 0.0% | 0.0% |
| k_Bacteria:p__Proteobacteria;c__Betaproteobacteria;o__Neisseriales;f__Neisseriaceae;g__                           | 0.0% | 0.0% | 0.0% | 0.0% | 0.2% | 0.0% |
| k_Bacteria:p__Proteobacteria;c__Betaproteobacteria;o__Neisseriales;f__Neisseriaceae;g__Deefgea                    | 0.0% | 0.0% | 0.0% | 0.0% | 0.0% | 0.0% |
| k_Bacteria:p__Proteobacteria;c__Betaproteobacteria;o__Neisseriales;f__Neisseriaceae;g__Vogesella                  | 0.0% | 0.0% | 0.0% | 0.0% | 0.0% | 0.0% |
| k_Bacteria:p__Proteobacteria;c__Betaproteobacteria;o__Nitrosomonadales;Other;Other                                | 0.0% | 0.0% | 0.0% | 0.0% | 0.0% | 0.0% |
| k_Bacteria:p__Proteobacteria;c__Betaproteobacteria;o__Nitrosomonadales;f__g__                                     | 0.3% | 0.0% | 0.1% | 0.2% | 1.9% | 0.0% |
| k_Bacteria:p__Proteobacteria;c__Betaproteobacteria;o__Nitrosomonadales;f__Nitrosomonadaceae;Other                 | 0.0% | 0.0% | 0.0% | 0.0% | 0.0% | 0.0% |
| k_Bacteria:p__Proteobacteria;c__Betaproteobacteria;o__Nitrosomonadales;f__Nitrosomonadaceae;g__                   | 0.5% | 0.0% | 0.5% | 0.1% | 2.0% | 0.4% |
| k_Bacteria:p__Proteobacteria;c__Betaproteobacteria;o__Nitrosomonadales;f__Nitrosomonadaceae;g__Nitrosovibrio      | 0.2% | 0.0% | 0.1% | 0.0% | 0.9% | 0.1% |
| k_Bacteria:p__Proteobacteria;c__Betaproteobacteria;o__Procabacteriales;f__Procabacteriaceae;g__                   | 0.0% | 0.0% | 0.0% | 0.0% | 0.0% | 0.0% |
| k_Bacteria:p__Proteobacteria;c__Betaproteobacteria;o__Procabacteriales;f__Procabacteriaceae;g__Procabacter        | 0.0% | 0.0% | 0.0% | 0.0% | 0.0% | 0.0% |
| k_Bacteria:p__Proteobacteria;c__Betaproteobacteria;o__Rhodocyclales;f__Rhodocyclaceae;Other                       | 0.0% | 0.0% | 0.0% | 0.0% | 0.0% | 0.0% |
| k_Bacteria:p__Proteobacteria;c__Betaproteobacteria;o__Rhodocyclales;f__Rhodocyclaceae;g__                         | 0.0% | 0.0% | 0.0% | 0.2% | 0.0% | 0.0% |
| k_Bacteria:p__Proteobacteria;c__Betaproteobacteria;o__Rhodocyclales;f__Rhodocyclaceae;g__Azoarcus                 | 0.0% | 0.0% | 0.0% | 0.0% | 0.0% | 0.0% |
| k_Bacteria:p__Proteobacteria;c__Betaproteobacteria;o__Rhodocyclales;f__Rhodocyclaceae;g__Azospira                 | 0.0% | 0.0% | 0.0% | 0.0% | 0.0% | 0.0% |
| k_Bacteria:p__Proteobacteria;c__Betaproteobacteria;o__Rhodocyclales;f__Rhodocyclaceae;g__Dechloromonas            | 0.0% | 0.0% | 0.0% | 0.0% | 0.0% | 0.0% |
| k_Bacteria:p__Proteobacteria;c__Betaproteobacteria;o__Rhodocyclales;f__Rhodocyclaceae;g__Dok59                    | 0.0% | 0.0% | 0.0% | 0.0% | 0.0% | 0.0% |
| k_Bacteria:p__Proteobacteria;c__Betaproteobacteria;o__Rhodocyclales;f__Rhodocyclaceae;g__Propionivibrio           | 0.0% | 0.0% | 0.0% | 0.0% | 0.0% | 0.0% |
| k_Bacteria:p__Proteobacteria;c__Betaproteobacteria;o__Rhodocyclales;f__Rhodocyclaceae;g__Rhodocycilus             | 0.0% | 0.0% | 0.0% | 0.0% | 0.0% | 0.0% |
| k_Bacteria:p__Proteobacteria;c__Betaproteobacteria;o__Rhodocyclales;f__Rhodocyclaceae;g__Sulfuritalea             | 0.0% | 0.0% | 0.0% | 0.0% | 0.0% | 0.0% |
| k_Bacteria:p__Proteobacteria;c__Betaproteobacteria;o__Rhodocyclales;f__Rhodocyclaceae;g__Thauera                  | 0.0% | 0.0% | 0.0% | 0.0% | 0.0% | 0.0% |
| k_Bacteria:p__Proteobacteria;c__Betaproteobacteria;o__Rhodocyclales;f__Rhodocyclaceae;g__Uliginosibacterium       | 0.0% | 0.0% | 0.0% | 0.0% | 0.0% | 0.0% |
| k_Bacteria:p__Proteobacteria;c__Betaproteobacteria;o__SBla14;f__g__                                               | 0.0% | 0.0% | 0.0% | 0.0% | 0.0% | 0.0% |
| k_Bacteria:p__Proteobacteria;c__Betaproteobacteria;o__SC-I-84;f__g__                                              | 0.3% | 0.1% | 0.5% | 0.4% | 0.1% | 0.2% |
| k_Bacteria:p__Proteobacteria;c__Betaproteobacteria;o__Thiobacteriales;f__g__                                      | 0.0% | 0.0% | 0.0% | 0.0% | 0.0% | 0.0% |
| k_Bacteria:p__Proteobacteria;c__Deltaproteobacteria;Other;Other;Other                                             | 0.0% | 0.0% | 0.0% | 0.0% | 0.0% | 0.0% |
| k_Bacteria:p__Proteobacteria;c__Deltaproteobacteria;o__f__g__                                                     | 0.1% | 0.0% | 0.1% | 0.1% | 0.0% | 0.1% |
| k_Bacteria:p__Proteobacteria;c__Deltaproteobacteria;o__BPC076;f__g__                                              | 0.0% | 0.0% | 0.0% | 0.0% | 0.0% | 0.0% |
| k_Bacteria:p__Proteobacteria;c__Deltaproteobacteria;o__Bdellovibrionales;f__Bacteriovoracaceae;Other              | 0.0% | 0.0% | 0.0% | 0.0% | 0.0% | 0.0% |
| k_Bacteria:p__Proteobacteria;c__Deltaproteobacteria;o__Bdellovibrionales;f__Bacteriovoracaceae;g__                | 0.1% | 0.1% | 0.1% | 0.2% | 0.0% | 0.0% |
| k_Bacteria:p__Proteobacteria;c__Deltaproteobacteria;o__Bdellovibrionales;f__Bacteriovoracaceae;g__Bacteriovorax   | 0.0% | 0.0% | 0.0% | 0.0% | 0.0% | 0.0% |
| k_Bacteria:p__Proteobacteria;c__Deltaproteobacteria;o__Bdellovibrionales;f__Bacteriovoracaceae;g__Peredibacter    | 0.0% | 0.0% | 0.0% | 0.0% | 0.0% | 0.0% |
| k_Bacteria:p__Proteobacteria;c__Deltaproteobacteria;o__Bdellovibrionales;f__Bdellovibrionaceae;g__                | 0.0% | 0.0% | 0.0% | 0.0% | 0.0% | 0.0% |
| k_Bacteria:p__Proteobacteria;c__Deltaproteobacteria;o__Bdellovibrionales;f__Bdellovibrionaceae;g__Bdellovibrio    | 0.2% | 0.3% | 0.2% | 0.4% | 0.0% | 0.1% |
| k_Bacteria:p__Proteobacteria;c__Deltaproteobacteria;o__Desulfarculales;f__Desulfarculaceae;g__                    | 0.0% | 0.0% | 0.0% | 0.0% | 0.0% | 0.0% |
| k_Bacteria:p__Proteobacteria;c__Deltaproteobacteria;o__Desulfobacteriales;f__Desulfobacteraceae;g__Desulfococcus  | 0.0% | 0.0% | 0.0% | 0.0% | 0.0% | 0.0% |
| k_Bacteria:p__Proteobacteria;c__Deltaproteobacteria;o__Desulfobacteriales;f__Desulfobulbaceae;g__                 | 0.0% | 0.0% | 0.0% | 0.0% | 0.0% | 0.1% |
| k_Bacteria:p__Proteobacteria;c__Deltaproteobacteria;o__Desulfobacteriales;f__Desulfobulbaceae;g__Desulfobulbus    | 0.0% | 0.0% | 0.0% | 0.0% | 0.0% | 0.0% |
| k_Bacteria:p__Proteobacteria;c__Deltaproteobacteria;o__Desulfovibrionales;f__Desulfovibrionaceae;g__              | 0.0% | 0.0% | 0.0% | 0.0% | 0.0% | 0.0% |
| k_Bacteria:p__Proteobacteria;c__Deltaproteobacteria;o__Desulfovibrionales;f__Desulfovibrionaceae;g__Desulfovibrio | 0.0% | 0.0% | 0.0% | 0.0% | 0.0% | 0.0% |
| k_Bacteria:p__Proteobacteria;c__Deltaproteobacteria;o__Desulfuromonadales;Other;Other                             | 0.0% | 0.0% | 0.0% | 0.0% | 0.0% | 0.0% |
| k_Bacteria:p__Proteobacteria;c__Deltaproteobacteria;o__Desulfuromonadales;f__Desulfuromonadaceae;g__              | 0.0% | 0.0% | 0.0% | 0.0% | 0.0% | 0.0% |
| k_Bacteria:p__Proteobacteria;c__Deltaproteobacteria;o__Desulfuromonadales;f__Geobacteraceae;g__                   | 0.0% | 0.0% | 0.0% | 0.0% | 0.0% | 0.0% |
| k_Bacteria:p__Proteobacteria;c__Deltaproteobacteria;o__Desulfuromonadales;f__Geobacteraceae;g__Geobacter          | 0.1% | 0.0% | 0.0% | 0.1% | 0.0% | 0.6% |
| k_Bacteria:p__Proteobacteria;c__Deltaproteobacteria;o__Desulfuromonadales;f__Pelobacteraceae;Other                | 0.0% | 0.0% | 0.0% | 0.0% | 0.0% | 0.0% |
| k_Bacteria:p__Proteobacteria;c__Deltaproteobacteria;o__Desulfuromonadales;f__Pelobacteraceae;g__                  | 0.0% | 0.0% | 0.0% | 0.0% | 0.0% | 0.1% |
| k_Bacteria:p__Proteobacteria;c__Deltaproteobacteria;o__Desulfuromonadales;f__Pelobacteraceae;g__Pelobacter        | 0.0% | 0.0% | 0.0% | 0.0% | 0.0% | 0.0% |
| k_Bacteria:p__Proteobacteria;c__Deltaproteobacteria;o__FAC87;f__g__                                               | 0.0% | 0.0% | 0.0% | 0.0% | 0.0% | 0.0% |
| k_Bacteria:p__Proteobacteria;c__Deltaproteobacteria;o__GMD14H09;f__g__                                            | 0.0% | 0.0% | 0.0% | 0.0% | 0.0% | 0.0% |



|                                                                                                                              |      |      |      |      |      |      |      |
|------------------------------------------------------------------------------------------------------------------------------|------|------|------|------|------|------|------|
| k_Bacteria;p__Proteobacteria;c__Deltaproteobacteria;o__MBNT15;f__g__                                                         | 0.0% | 0.0% | 0.0% | 0.0% | 0.0% | 0.0% | 0.1% |
| k_Bacteria;p__Proteobacteria;c__Deltaproteobacteria;o__MIZ46;f__g__                                                          | 0.1% | 0.0% | 0.1% | 0.2% | 0.0% | 0.1% | 0.1% |
| k_Bacteria;p__Proteobacteria;c__Deltaproteobacteria;o__Myxococcales;Other:Other                                              | 0.0% | 0.0% | 0.0% | 0.0% | 0.0% | 0.0% | 0.0% |
| k_Bacteria;p__Proteobacteria;c__Deltaproteobacteria;o__Myxococcales;f__g__                                                   | 1.0% | 2.1% | 0.7% | 1.3% | 0.3% | 0.5% | 1.0% |
| k_Bacteria;p__Proteobacteria;c__Deltaproteobacteria;o__Myxococcales;f__0319-6G20;g__                                         | 0.0% | 0.0% | 0.0% | 0.0% | 0.0% | 0.0% | 0.0% |
| k_Bacteria;p__Proteobacteria;c__Deltaproteobacteria;o__Myxococcales;f__Cystobacterineae;g__                                  | 0.0% | 0.0% | 0.0% | 0.0% | 0.0% | 0.0% | 0.0% |
| k_Bacteria;p__Proteobacteria;c__Deltaproteobacteria;o__Myxococcales;f__Haliangiaceae;Other                                   | 0.0% | 0.0% | 0.0% | 0.0% | 0.0% | 0.0% | 0.0% |
| k_Bacteria;p__Proteobacteria;c__Deltaproteobacteria;o__Myxococcales;f__Haliangiaceae;g__                                     | 0.2% | 0.3% | 0.2% | 0.1% | 0.0% | 0.1% | 0.2% |
| k_Bacteria;p__Proteobacteria;c__Deltaproteobacteria;o__Myxococcales;f__Haliangiaceae;g__Haliangium                           | 0.0% | 0.0% | 0.0% | 0.0% | 0.0% | 0.0% | 0.0% |
| k_Bacteria;p__Proteobacteria;c__Deltaproteobacteria;o__Myxococcales;f__Myxococcaceae;Other                                   | 0.0% | 0.0% | 0.0% | 0.0% | 0.0% | 0.0% | 0.0% |
| k_Bacteria;p__Proteobacteria;c__Deltaproteobacteria;o__Myxococcales;f__Myxococcaceae;g__                                     | 0.0% | 0.0% | 0.0% | 0.0% | 0.0% | 0.0% | 0.0% |
| k_Bacteria;p__Proteobacteria;c__Deltaproteobacteria;o__Myxococcales;f__Myxococcaceae;g__Anaeromyxobacter                     | 0.0% | 0.0% | 0.0% | 0.0% | 0.0% | 0.0% | 0.1% |
| k_Bacteria;p__Proteobacteria;c__Deltaproteobacteria;o__Myxococcales;f__Myxococcaceae;g__Myxococcus                           | 0.0% | 0.0% | 0.0% | 0.0% | 0.0% | 0.0% | 0.0% |
| k_Bacteria;p__Proteobacteria;c__Deltaproteobacteria;o__Myxococcales;f__Nannocystaceae;g__Nannocystis                         | 0.0% | 0.0% | 0.0% | 0.0% | 0.0% | 0.0% | 0.0% |
| k_Bacteria;p__Proteobacteria;c__Deltaproteobacteria;o__Myxococcales;f__Nannocystaceae;g__Plesiocystis                        | 0.0% | 0.1% | 0.0% | 0.0% | 0.0% | 0.0% | 0.0% |
| k_Bacteria;p__Proteobacteria;c__Deltaproteobacteria;o__Myxococcales;f__OM27;g__                                              | 0.1% | 0.2% | 0.1% | 0.1% | 0.0% | 0.1% | 0.0% |
| k_Bacteria;p__Proteobacteria;c__Deltaproteobacteria;o__Myxococcales;Other                                                    | 0.0% | 0.0% | 0.0% | 0.0% | 0.0% | 0.0% | 0.0% |
| k_Bacteria;p__Proteobacteria;c__Deltaproteobacteria;o__Myxococcales;f__Polyangiaceae;g__                                     | 0.0% | 0.0% | 0.0% | 0.0% | 0.0% | 0.0% | 0.0% |
| k_Bacteria;p__Proteobacteria;c__Deltaproteobacteria;o__Myxococcales;f__Polyangiaceae;g__Chondromyces                         | 0.0% | 0.0% | 0.0% | 0.0% | 0.0% | 0.0% | 0.0% |
| k_Bacteria;p__Proteobacteria;c__Deltaproteobacteria;o__NB1-j;f__g__                                                          | 0.1% | 0.0% | 0.1% | 0.1% | 0.0% | 0.1% | 0.1% |
| k_Bacteria;p__Proteobacteria;c__Deltaproteobacteria;o__NB1-j;f__JTB38;g__                                                    | 0.0% | 0.0% | 0.0% | 0.0% | 0.0% | 0.0% | 0.0% |
| k_Bacteria;p__Proteobacteria;c__Deltaproteobacteria;o__NB1-j;f__MND4;g__                                                     | 0.0% | 0.0% | 0.0% | 0.0% | 0.0% | 0.0% | 0.0% |
| k_Bacteria;p__Proteobacteria;c__Deltaproteobacteria;o__NB1-j;f__NB1-i;g__                                                    | 0.1% | 0.0% | 0.0% | 0.1% | 0.0% | 0.1% | 0.1% |
| k_Bacteria;p__Proteobacteria;c__Deltaproteobacteria;o__NB1-j;f__g__                                                          | 0.0% | 0.0% | 0.0% | 0.0% | 0.0% | 0.0% | 0.0% |
| k_Bacteria;p__Proteobacteria;c__Deltaproteobacteria;o__PB19;f__g__                                                           | 0.0% | 0.0% | 0.0% | 0.0% | 0.0% | 0.0% | 0.0% |
| k_Bacteria;p__Proteobacteria;c__Deltaproteobacteria;o__Spirobacillales;f__g__                                                | 0.1% | 0.1% | 0.1% | 0.1% | 0.0% | 0.0% | 0.0% |
| k_Bacteria;p__Proteobacteria;c__Deltaproteobacteria;o__Sva0853;f__JTB36;g__                                                  | 0.0% | 0.0% | 0.0% | 0.0% | 0.0% | 0.0% | 0.0% |
| k_Bacteria;p__Proteobacteria;c__Deltaproteobacteria;o__Syntrophobacterales;f__Syntrophaceae;g__                              | 0.0% | 0.0% | 0.0% | 0.0% | 0.0% | 0.0% | 0.0% |
| k_Bacteria;p__Proteobacteria;c__Deltaproteobacteria;o__Syntrophobacterales;f__Syntrophaceae;g__Desulfobacca                  | 0.0% | 0.0% | 0.0% | 0.0% | 0.0% | 0.0% | 0.0% |
| k_Bacteria;p__Proteobacteria;c__Deltaproteobacteria;o__Syntrophobacterales;f__Syntrophaceae;g__Smithella                     | 0.0% | 0.0% | 0.0% | 0.0% | 0.0% | 0.0% | 0.0% |
| k_Bacteria;p__Proteobacteria;c__Deltaproteobacteria;o__Syntrophobacterales;f__Syntrophobacteraceae;Other                     | 0.0% | 0.0% | 0.0% | 0.0% | 0.0% | 0.0% | 0.0% |
| k_Bacteria;p__Proteobacteria;c__Deltaproteobacteria;o__Syntrophobacterales;f__Syntrophobacteraceae;g__                       | 1.5% | 1.1% | 1.0% | 1.4% | 1.4% | 1.2% | 2.9% |
| k_Bacteria;p__Proteobacteria;c__Deltaproteobacteria;o__Syntrophobacterales;f__Syntrophobacteraceae;g__Syntrophobacter        | 0.0% | 0.0% | 0.0% | 0.0% | 0.0% | 0.0% | 0.1% |
| k_Bacteria;p__Proteobacteria;c__Deltaproteobacteria;o__Syntrophobacterales;f__Syntrophorhabdaceae;g__                        | 0.0% | 0.0% | 0.0% | 0.0% | 0.0% | 0.0% | 0.0% |
| k_Bacteria;p__Proteobacteria;c__Deltaproteobacteria;o__[Entotheonellales];f__g__                                             | 0.0% | 0.0% | 0.0% | 0.0% | 0.0% | 0.0% | 0.0% |
| k_Bacteria;p__Proteobacteria;c__Deltaproteobacteria;o__[Entotheonellales];f__[Entotheonellaceae];g__                         | 0.3% | 0.1% | 0.1% | 0.3% | 0.0% | 0.1% | 1.0% |
| k_Bacteria;p__Proteobacteria;c__Deltaproteobacteria;o__[Entotheonellales];f__[Entotheonellaceae];g__Candidatus Entotheonella | 0.1% | 0.4% | 0.0% | 0.0% | 0.0% | 0.0% | 0.0% |
| k_Bacteria;p__Proteobacteria;c__Epsilonproteobacteria;o__Campylobacteriales;f__Helicobacteraceae;g__Sulfuricurvum            | 0.0% | 0.0% | 0.0% | 0.0% | 0.0% | 0.0% | 0.0% |
| k_Bacteria;p__Proteobacteria;c__Gammaproteobacteria;Other:Other:Other                                                        | 0.0% | 0.0% | 0.0% | 0.0% | 0.0% | 0.0% | 0.0% |
| k_Bacteria;p__Proteobacteria;c__Gammaproteobacteria;o__f__g__                                                                | 0.1% | 0.0% | 0.0% | 0.1% | 0.3% | 0.0% | 0.0% |
| k_Bacteria;p__Proteobacteria;c__Gammaproteobacteria;o__34P16;f__g__                                                          | 0.0% | 0.0% | 0.0% | 0.0% | 0.0% | 0.0% | 0.0% |
| k_Bacteria;p__Proteobacteria;c__Gammaproteobacteria;o__Acidithiobacillales;f__g__                                            | 0.0% | 0.0% | 0.0% | 0.0% | 0.0% | 0.0% | 0.0% |
| k_Bacteria;p__Proteobacteria;c__Gammaproteobacteria;o__Aeromonadales;f__Aeromonadaceae;g__                                   | 0.0% | 0.0% | 0.0% | 0.0% | 0.0% | 0.0% | 0.0% |
| k_Bacteria;p__Proteobacteria;c__Gammaproteobacteria;o__Alteromonadales;Other:Other                                           | 0.0% | 0.1% | 0.0% | 0.1% | 0.0% | 0.0% | 0.0% |
| k_Bacteria;p__Proteobacteria;c__Gammaproteobacteria;o__Alteromonadales;f__g__                                                | 0.0% | 0.0% | 0.0% | 0.0% | 0.0% | 0.0% | 0.0% |
| k_Bacteria;p__Proteobacteria;c__Gammaproteobacteria;o__Alteromonadales;f__125ds10;g__                                        | 0.0% | 0.0% | 0.0% | 0.0% | 0.0% | 0.0% | 0.0% |
| k_Bacteria;p__Proteobacteria;c__Gammaproteobacteria;o__Alteromonadales;f__211ds20;g__                                        | 0.0% | 0.2% | 0.0% | 0.0% | 0.0% | 0.0% | 0.0% |
| k_Bacteria;p__Proteobacteria;c__Gammaproteobacteria;o__Alteromonadales;f__Alteromonadaceae;Other                             | 0.0% | 0.0% | 0.0% | 0.0% | 0.0% | 0.0% | 0.0% |
| k_Bacteria;p__Proteobacteria;c__Gammaproteobacteria;o__Alteromonadales;f__Alteromonadaceae;g__                               | 0.0% | 0.0% | 0.0% | 0.0% | 0.0% | 0.0% | 0.0% |
| k_Bacteria;p__Proteobacteria;c__Gammaproteobacteria;o__Alteromonadales;f__Alteromonadaceae;g__Cellvibrio                     | 0.0% | 0.0% | 0.0% | 0.0% | 0.0% | 0.0% | 0.0% |
| k_Bacteria;p__Proteobacteria;c__Gammaproteobacteria;o__Alteromonadales;f__Alteromonadaceae;g__Marinobacter                   | 0.0% | 0.0% | 0.0% | 0.0% | 0.0% | 0.0% | 0.0% |
| k_Bacteria;p__Proteobacteria;c__Gammaproteobacteria;o__Alteromonadales;f__HTCC2188;g__HTCC                                   | 0.0% | 0.0% | 0.0% | 0.0% | 0.0% | 0.0% | 0.0% |
| k_Bacteria;p__Proteobacteria;c__Gammaproteobacteria;o__Alteromonadales;f__OM60;g__                                           | 0.0% | 0.1% | 0.0% | 0.2% | 0.0% | 0.0% | 0.0% |
| k_Bacteria;p__Proteobacteria;c__Gammaproteobacteria;o__Alteromonadales;f__[Chromatiaceae];g__Rheinheimera                    | 0.0% | 0.0% | 0.0% | 0.0% | 0.0% | 0.0% | 0.0% |
| k_Bacteria;p__Proteobacteria;c__Gammaproteobacteria;o__Chromatiales;Other:Other                                              | 0.0% | 0.0% | 0.0% | 0.0% | 0.0% | 0.0% | 0.0% |
| k_Bacteria;p__Proteobacteria;c__Gammaproteobacteria;o__Chromatiales;f__g__                                                   | 1.0% | 0.1% | 0.2% | 0.0% | 0.0% | 5.7% | 0.2% |
| k_Bacteria;p__Proteobacteria;c__Gammaproteobacteria;o__Chromatiales;f__Chromatiaceae;Other                                   | 0.0% | 0.0% | 0.0% | 0.0% | 0.0% | 0.0% | 0.0% |
| k_Bacteria;p__Proteobacteria;c__Gammaproteobacteria;o__Chromatiales;f__Chromatiaceae;g__                                     | 0.0% | 0.0% | 0.0% | 0.0% | 0.0% | 0.0% | 0.0% |
| k_Bacteria;p__Proteobacteria;c__Gammaproteobacteria;o__Chromatiales;f__Chromatiaceae;g__Nitrosococcus                        | 0.0% | 0.0% | 0.0% | 0.0% | 0.0% | 0.0% | 0.0% |
| k_Bacteria;p__Proteobacteria;c__Gammaproteobacteria;o__Chromatiales;f__Ectothiorhodospiraceae;g__                            | 0.0% | 0.0% | 0.0% | 0.0% | 0.0% | 0.0% | 0.0% |
| k_Bacteria;p__Proteobacteria;c__Gammaproteobacteria;o__Chromatiales;f__Ectothiorhodospiraceae;g__Halorhodospira              | 0.0% | 0.0% | 0.0% | 0.0% | 0.0% | 0.0% | 0.0% |
| k_Bacteria;p__Proteobacteria;c__Gammaproteobacteria;o__Chromatiales;f__Ectothiorhodospiraceae;g__Natronocella                | 0.0% | 0.0% | 0.0% | 0.0% | 0.0% | 0.0% | 0.0% |
| k_Bacteria;p__Proteobacteria;c__Gammaproteobacteria;o__Enterobacteriales;f__Enterobacteriaceae;Other                         | 0.0% | 0.0% | 0.0% | 0.0% | 0.0% | 0.0% | 0.0% |
| k_Bacteria;p__Proteobacteria;c__Gammaproteobacteria;o__Enterobacteriales;f__Enterobacteriaceae;g__                           | 0.0% | 0.0% | 0.0% | 0.0% | 0.0% | 0.0% | 0.0% |
| k_Bacteria;p__Proteobacteria;c__Gammaproteobacteria;o__Enterobacteriales;f__Enterobacteriaceae;g__Providencia                | 0.0% | 0.0% | 0.0% | 0.0% | 0.0% | 0.0% | 0.0% |
| k_Bacteria;p__Proteobacteria;c__Gammaproteobacteria;o__HOC36;f__g__                                                          | 0.0% | 0.0% | 0.0% | 0.0% | 0.0% | 0.0% | 0.1% |
| k_Bacteria;p__Proteobacteria;c__Gammaproteobacteria;o__HTCC2188;f__HTCC2089;g__                                              | 0.1% | 0.1% | 0.0% | 0.3% | 0.0% | 0.0% | 0.1% |

|                                                                                                                 |      |      |      |      |      |      |      |
|-----------------------------------------------------------------------------------------------------------------|------|------|------|------|------|------|------|
| k_Bacteria;p__Proteobacteria;c__Gammaproteobacteria;o__Legionellales;Other;Other                                | 0.0% | 0.0% | 0.0% | 0.0% | 0.0% | 0.0% | 0.0% |
| k_Bacteria;p__Proteobacteria;c__Gammaproteobacteria;o__Legionellales;f__g__                                     | 0.1% | 0.0% | 0.1% | 0.1% | 0.1% | 0.0% | 0.0% |
| k_Bacteria;p__Proteobacteria;c__Gammaproteobacteria;o__Legionellales;f__Coxiellaceae;Other                      | 0.0% | 0.0% | 0.0% | 0.0% | 0.0% | 0.0% | 0.0% |
| k_Bacteria;p__Proteobacteria;c__Gammaproteobacteria;o__Legionellales;f__Coxiellaceae;g__                        | 0.2% | 0.2% | 0.1% | 0.3% | 0.4% | 0.2% | 0.1% |
| k_Bacteria;p__Proteobacteria;c__Gammaproteobacteria;o__Legionellales;f__Coxiellaceae;g__Aquicella               | 0.1% | 0.0% | 0.0% | 0.1% | 0.5% | 0.0% | 0.0% |
| k_Bacteria;p__Proteobacteria;c__Gammaproteobacteria;o__Legionellales;f__Coxiellaceae;g__Coxiella                | 0.0% | 0.0% | 0.0% | 0.0% | 0.0% | 0.0% | 0.0% |
| k_Bacteria;p__Proteobacteria;c__Gammaproteobacteria;o__Legionellales;f__Coxiellaceae;g__Rickettsiella           | 0.0% | 0.0% | 0.0% | 0.0% | 0.0% | 0.0% | 0.0% |
| k_Bacteria;p__Proteobacteria;c__Gammaproteobacteria;o__Legionellales;f__Legionellaceae;Other                    | 0.0% | 0.0% | 0.0% | 0.0% | 0.0% | 0.0% | 0.0% |
| k_Bacteria;p__Proteobacteria;c__Gammaproteobacteria;o__Legionellales;f__Legionellaceae;g__                      | 0.0% | 0.1% | 0.0% | 0.1% | 0.0% | 0.0% | 0.0% |
| k_Bacteria;p__Proteobacteria;c__Gammaproteobacteria;o__Legionellales;f__Legionellaceae;g__Legionella            | 0.0% | 0.0% | 0.0% | 0.1% | 0.0% | 0.0% | 0.0% |
| k_Bacteria;p__Proteobacteria;c__Gammaproteobacteria;o__Legionellales;f__Legionellaceae;g__Tatlockia             | 0.0% | 0.0% | 0.0% | 0.0% | 0.0% | 0.0% | 0.0% |
| k_Bacteria;p__Proteobacteria;c__Gammaproteobacteria;o__Methylococcales;f__Crenotrichaceae;g__Crenothrix         | 0.0% | 0.0% | 0.0% | 0.0% | 0.0% | 0.0% | 0.0% |
| k_Bacteria;p__Proteobacteria;c__Gammaproteobacteria;o__Methylococcales;f__Methylococcaceae;Other                | 0.0% | 0.0% | 0.0% | 0.0% | 0.0% | 0.0% | 0.1% |
| k_Bacteria;p__Proteobacteria;c__Gammaproteobacteria;o__Methylococcales;f__Methylococcaceae;g__                  | 0.0% | 0.0% | 0.0% | 0.0% | 0.0% | 0.0% | 0.1% |
| k_Bacteria;p__Proteobacteria;c__Gammaproteobacteria;o__Methylococcales;f__Methylococcaceae;g__Methylocaldum     | 0.0% | 0.0% | 0.0% | 0.0% | 0.0% | 0.0% | 0.0% |
| k_Bacteria;p__Proteobacteria;c__Gammaproteobacteria;o__Methylococcales;f__Methylococcaceae;g__Methylomonas      | 0.0% | 0.0% | 0.0% | 0.0% | 0.0% | 0.0% | 0.0% |
| k_Bacteria;p__Proteobacteria;c__Gammaproteobacteria;o__Methylococcales;f__Methylococcaceae;g__Methylosarcina    | 0.0% | 0.0% | 0.0% | 0.0% | 0.0% | 0.0% | 0.0% |
| k_Bacteria;p__Proteobacteria;c__Gammaproteobacteria;o__Oceanospirillales;f__Halomonadaceae;g__                  | 0.0% | 0.0% | 0.0% | 0.0% | 0.0% | 0.0% | 0.0% |
| k_Bacteria;p__Proteobacteria;c__Gammaproteobacteria;o__Oceanospirillales;f__Halomonadaceae;g__Halomonas         | 0.0% | 0.0% | 0.0% | 0.0% | 0.0% | 0.0% | 0.0% |
| k_Bacteria;p__Proteobacteria;c__Gammaproteobacteria;o__Oceanospirillales;f__Oceanospirillaceae;g__              | 0.0% | 0.0% | 0.0% | 0.0% | 0.0% | 0.0% | 0.0% |
| k_Bacteria;p__Proteobacteria;c__Gammaproteobacteria;o__Oceanospirillales;f__Oleiphilaceae;g__                   | 0.0% | 0.0% | 0.0% | 0.0% | 0.0% | 0.0% | 0.0% |
| k_Bacteria;p__Proteobacteria;c__Gammaproteobacteria;o__PYR10d3;f__g__                                           | 0.0% | 0.0% | 0.0% | 0.0% | 0.0% | 0.0% | 0.0% |
| k_Bacteria;p__Proteobacteria;c__Gammaproteobacteria;o__Pseudomonadales;Other;Other                              | 0.0% | 0.0% | 0.0% | 0.0% | 0.0% | 0.0% | 0.0% |
| k_Bacteria;p__Proteobacteria;c__Gammaproteobacteria;o__Pseudomonadales;f__Moraxellaceae;Other                   | 0.0% | 0.0% | 0.0% | 0.0% | 0.0% | 0.0% | 0.0% |
| k_Bacteria;p__Proteobacteria;c__Gammaproteobacteria;o__Pseudomonadales;f__Moraxellaceae;g__                     | 0.1% | 0.0% | 0.0% | 0.0% | 0.6% | 0.0% | 0.0% |
| k_Bacteria;p__Proteobacteria;c__Gammaproteobacteria;o__Pseudomonadales;f__Moraxellaceae;g__Acinetobacter        | 0.0% | 0.0% | 0.0% | 0.0% | 0.0% | 0.0% | 0.0% |
| k_Bacteria;p__Proteobacteria;c__Gammaproteobacteria;o__Pseudomonadales;f__Moraxellaceae;g__Perluclidibaca       | 0.0% | 0.0% | 0.1% | 0.0% | 0.0% | 0.0% | 0.0% |
| k_Bacteria;p__Proteobacteria;c__Gammaproteobacteria;o__Pseudomonadales;f__Pseudomonadaceae;Other                | 0.0% | 0.0% | 0.0% | 0.0% | 0.0% | 0.0% | 0.0% |
| k_Bacteria;p__Proteobacteria;c__Gammaproteobacteria;o__Pseudomonadales;f__Pseudomonadaceae;g__                  | 0.0% | 0.0% | 0.0% | 0.0% | 0.0% | 0.0% | 0.0% |
| k_Bacteria;p__Proteobacteria;c__Gammaproteobacteria;o__Pseudomonadales;f__Pseudomonadaceae;g__Pseudomonas       | 0.1% | 0.2% | 0.1% | 0.2% | 0.3% | 0.1% | 0.0% |
| k_Bacteria;p__Proteobacteria;c__Gammaproteobacteria;o__Thiotrichales;f__Piscirickettsiaceae;g__                 | 0.6% | 2.3% | 0.2% | 0.6% | 0.0% | 0.1% | 0.4% |
| k_Bacteria;p__Proteobacteria;c__Gammaproteobacteria;o__Xanthomonadales;f__Sinobacteraceae;g__                   | 1.2% | 1.6% | 0.6% | 1.5% | 1.4% | 1.1% | 0.8% |
| k_Bacteria;p__Proteobacteria;c__Gammaproteobacteria;o__Xanthomonadales;f__Sinobacteraceae;g__Nevskia            | 0.0% | 0.0% | 0.0% | 0.0% | 0.0% | 0.0% | 0.0% |
| k_Bacteria;p__Proteobacteria;c__Gammaproteobacteria;o__Xanthomonadales;f__Sinobacteraceae;g__Steroidobacter     | 0.3% | 0.8% | 0.4% | 0.3% | 0.0% | 0.1% | 0.4% |
| k_Bacteria;p__Proteobacteria;c__Gammaproteobacteria;o__Xanthomonadales;f__Xanthomonadaceae;Other                | 0.1% | 0.1% | 0.6% | 0.0% | 0.0% | 0.0% | 0.0% |
| k_Bacteria;p__Proteobacteria;c__Gammaproteobacteria;o__Xanthomonadales;f__Xanthomonadaceae;g__                  | 0.3% | 0.8% | 0.5% | 0.5% | 0.2% | 0.1% | 0.0% |
| k_Bacteria;p__Proteobacteria;c__Gammaproteobacteria;o__Xanthomonadales;f__Xanthomonadaceae;g__Arenimonas        | 0.0% | 0.1% | 0.0% | 0.0% | 0.0% | 0.0% | 0.0% |
| k_Bacteria;p__Proteobacteria;c__Gammaproteobacteria;o__Xanthomonadales;f__Xanthomonadaceae;g__Dokdonella        | 0.0% | 0.0% | 0.0% | 0.0% | 0.0% | 0.0% | 0.0% |
| k_Bacteria;p__Proteobacteria;c__Gammaproteobacteria;o__Xanthomonadales;f__Xanthomonadaceae;g__Luteibacter       | 0.0% | 0.0% | 0.0% | 0.0% | 0.0% | 0.0% | 0.0% |
| k_Bacteria;p__Proteobacteria;c__Gammaproteobacteria;o__Xanthomonadales;f__Xanthomonadaceae;g__Luteimonas        | 0.0% | 0.0% | 0.1% | 0.0% | 0.0% | 0.0% | 0.0% |
| k_Bacteria;p__Proteobacteria;c__Gammaproteobacteria;o__Xanthomonadales;f__Xanthomonadaceae;g__Lysobacter        | 0.1% | 0.1% | 0.3% | 0.0% | 0.0% | 0.0% | 0.0% |
| k_Bacteria;p__Proteobacteria;c__Gammaproteobacteria;o__Xanthomonadales;f__Xanthomonadaceae;g__Pseudoxanthomonas | 0.0% | 0.0% | 0.0% | 0.0% | 0.0% | 0.0% | 0.0% |
| k_Bacteria;p__Proteobacteria;c__Gammaproteobacteria;o__Xanthomonadales;f__Xanthomonadaceae;g__Rhodanobacter     | 0.1% | 0.0% | 0.0% | 0.1% | 0.5% | 0.0% | 0.0% |
| k_Bacteria;p__Proteobacteria;c__Gammaproteobacteria;o__Xanthomonadales;f__Xanthomonadaceae;g__Stenotrophomonas  | 0.0% | 0.0% | 0.0% | 0.0% | 0.0% | 0.0% | 0.0% |
| k_Bacteria;p__Proteobacteria;c__Gammaproteobacteria;o__Xanthomonadales;f__Xanthomonadaceae;g__Thermomonas       | 0.0% | 0.0% | 0.0% | 0.0% | 0.0% | 0.0% | 0.0% |
| k_Bacteria;p__Proteobacteria;c__Gammaproteobacteria;o__[Marinicellales];f__[Marinicellaceae];g__                | 0.0% | 0.0% | 0.0% | 0.0% | 0.0% | 0.0% | 0.0% |
| k_Bacteria;p__Proteobacteria;c__TA18;o__CV90;f__g__                                                             | 0.0% | 0.0% | 0.0% | 0.0% | 0.0% | 0.0% | 0.0% |
| k_Bacteria;p__Proteobacteria;c__TA18;o__PHOS-HD29;f__g__                                                        | 0.0% | 0.0% | 0.0% | 0.1% | 0.0% | 0.0% | 0.0% |
| k_Bacteria;p__SBR1093;c__o__f__g__                                                                              | 0.0% | 0.0% | 0.0% | 0.0% | 0.0% | 0.2% | 0.0% |
| k_Bacteria;p__SBR1093;c__VHS-B5-50;o__f__g__                                                                    | 0.0% | 0.0% | 0.0% | 0.0% | 0.0% | 0.0% | 0.0% |
| k_Bacteria;p__SC4;c__o__f__g__                                                                                  | 0.0% | 0.0% | 0.0% | 0.0% | 0.0% | 0.0% | 0.0% |
| k_Bacteria;p__SR1;c__o__f__g__                                                                                  | 0.0% | 0.0% | 0.0% | 0.0% | 0.0% | 0.0% | 0.0% |
| k_Bacteria;p__Spirochaetes;c__GN05;o__f__g__                                                                    | 0.0% | 0.0% | 0.0% | 0.0% | 0.0% | 0.0% | 0.0% |
| k_Bacteria;p__Spirochaetes;c__[Leptospirae];o__[Leptospirales];f__Leptospiraceae;g__Leptonema                   | 0.0% | 0.0% | 0.0% | 0.0% | 0.0% | 0.0% | 0.0% |
| k_Bacteria;p__Spirochaetes;c__[Leptospirae];o__[Leptospirales];f__Leptospiraceae;g__Leptospira                  | 0.0% | 0.0% | 0.0% | 0.0% | 0.0% | 0.0% | 0.0% |
| k_Bacteria;p__Spirochaetes;c__[Leptospirae];o__[Leptospirales];f__Leptospiraceae;g__Turneriella                 | 0.0% | 0.0% | 0.0% | 0.0% | 0.0% | 0.0% | 0.0% |
| k_Bacteria;p__TM6;c__SBRH58;o__f__g__                                                                           | 0.0% | 0.0% | 0.0% | 0.0% | 0.0% | 0.0% | 0.0% |
| k_Bacteria;p__TM6;c__SJA-4;Other;Other;Other                                                                    | 0.0% | 0.0% | 0.0% | 0.0% | 0.0% | 0.0% | 0.0% |
| k_Bacteria;p__TM6;c__SJA-4;o__f__g__                                                                            | 0.1% | 0.2% | 0.1% | 0.1% | 0.1% | 0.1% | 0.2% |
| k_Bacteria;p__TM6;c__SJA-4;o__S1198;f__g__                                                                      | 0.0% | 0.0% | 0.0% | 0.0% | 0.0% | 0.0% | 0.0% |
| k_Bacteria;p__TM6;c__SJA-4;o__YIF2-48;f__g__                                                                    | 0.0% | 0.0% | 0.0% | 0.0% | 0.0% | 0.0% | 0.0% |
| k_Bacteria;p__TM7;Other;Other;Other;Other                                                                       | 0.0% | 0.0% | 0.0% | 0.0% | 0.0% | 0.0% | 0.0% |
| k_Bacteria;p__TM7;c__o__f__g__                                                                                  | 0.0% | 0.0% | 0.0% | 0.0% | 0.0% | 0.0% | 0.0% |
| k_Bacteria;p__TM7;c__MJK10;o__f__g__                                                                            | 0.0% | 0.0% | 0.0% | 0.0% | 0.0% | 0.0% | 0.0% |
| k_Bacteria;p__TM7;c__SC3;o__f__g__                                                                              | 0.0% | 0.0% | 0.0% | 0.0% | 0.0% | 0.0% | 0.0% |
| k_Bacteria;p__TM7;c__TM7-1;o__f__g__                                                                            | 0.4% | 0.5% | 0.4% | 0.5% | 0.1% | 0.3% | 0.4% |
| k_Bacteria;p__TM7;c__TM7-3;Other;Other;Other                                                                    | 0.0% | 0.0% | 0.0% | 0.0% | 0.1% | 0.0% | 0.0% |

|                                                                                                                                 |      |      |      |      |      |      |      |
|---------------------------------------------------------------------------------------------------------------------------------|------|------|------|------|------|------|------|
| k_Bacteria:p_TM7;c_TM7-3;o_:f_:g_                                                                                               | 0.1% | 0.1% | 0.2% | 0.0% | 0.0% | 0.0% | 0.0% |
| k_Bacteria:p_TM7;c_TM7-3;o_Blg118:f_:g_                                                                                         | 0.0% | 0.0% | 0.0% | 0.0% | 0.0% | 0.0% | 0.0% |
| k_Bacteria:p_TM7;c_TM7-3;o_CW040:f_F16:g_                                                                                       | 0.0% | 0.0% | 0.0% | 0.0% | 0.0% | 0.0% | 0.0% |
| k_Bacteria:p_TM7;c_TM7-3;o_EW055:f_:g_                                                                                          | 0.0% | 0.0% | 0.0% | 0.0% | 0.0% | 0.0% | 0.0% |
| k_Bacteria:p_TM7;c_TM7-3;o_I025:f_:g_                                                                                           | 0.0% | 0.0% | 0.0% | 0.0% | 0.0% | 0.0% | 0.0% |
| k_Bacteria:p_Tenericutes;c_Mollicutes;o_:f_:g_                                                                                  | 0.0% | 0.0% | 0.0% | 0.0% | 0.0% | 0.0% | 0.0% |
| k_Bacteria:p_Tenericutes;c_Mollicutes;o_Anaeroplasmatales:f_Anaeroplasmataceae:g_                                               | 0.0% | 0.0% | 0.0% | 0.0% | 0.0% | 0.0% | 0.0% |
| k_Bacteria:p_Tenericutes;c_Mollicutes;o_Anaeroplasmatales:f_Anaeroplasmataceae:g_Asteroleplasma                                 | 0.0% | 0.0% | 0.0% | 0.0% | 0.0% | 0.0% | 0.0% |
| k_Bacteria:p_Verrucomicrobia;c_:o_:f_:g_                                                                                        | 0.0% | 0.0% | 0.0% | 0.0% | 0.0% | 0.0% | 0.0% |
| k_Bacteria:p_Verrucomicrobia;c_Opitutae;o_:f_:g_                                                                                | 0.0% | 0.1% | 0.0% | 0.0% | 0.0% | 0.0% | 0.0% |
| k_Bacteria:p_Verrucomicrobia;c_Opitutae;o_Opitutales:f_Opitutaceae:g_                                                           | 0.0% | 0.1% | 0.0% | 0.1% | 0.0% | 0.0% | 0.0% |
| k_Bacteria:p_Verrucomicrobia;c_Opitutae;o_Opitutales:f_Opitutaceae:g_Opitutus                                                   | 0.1% | 0.2% | 0.1% | 0.1% | 0.0% | 0.0% | 0.1% |
| k_Bacteria:p_Verrucomicrobia;c_Opitutae;o_[Cericococcales]:f_[Cericococcaceae]:g_                                               | 0.0% | 0.0% | 0.0% | 0.0% | 0.0% | 0.0% | 0.0% |
| k_Bacteria:p_Verrucomicrobia;c_Verruco-5;o_LD1-PB3:f_:g_                                                                        | 0.0% | 0.0% | 0.0% | 0.0% | 0.0% | 0.0% | 0.0% |
| k_Bacteria:p_Verrucomicrobia;c_Verruco-5;o_WCHB1-41:f_:g_                                                                       | 0.0% | 0.0% | 0.0% | 0.0% | 0.0% | 0.0% | 0.0% |
| k_Bacteria:p_Verrucomicrobia;c_Verrucomicrobiae;o_Verrucomicrobiales:f_Verrucomicrobiaceae:g_                                   | 0.1% | 0.1% | 0.0% | 0.2% | 0.0% | 0.0% | 0.1% |
| k_Bacteria:p_Verrucomicrobia;c_Verrucomicrobiae;o_Verrucomicrobiales:f_Verrucomicrobiaceae:g_Luteolibacter                      | 0.0% | 0.1% | 0.0% | 0.1% | 0.0% | 0.0% | 0.0% |
| k_Bacteria:p_Verrucomicrobia;c_Verrucomicrobiae;o_Verrucomicrobiales:f_Verrucomicrobiaceae:g_Prosthecobacter                    | 0.0% | 0.0% | 0.0% | 0.0% | 0.0% | 0.0% | 0.0% |
| k_Bacteria:p_Verrucomicrobia;c_Verrucomicrobiae;o_Verrucomicrobiales:f_Verrucomicrobiaceae:g_Verrucomicrobium                   | 0.0% | 0.0% | 0.0% | 0.0% | 0.0% | 0.0% | 0.0% |
| k_Bacteria:p_Verrucomicrobia;c_[Methylacidiphilae];o_Methylacidiphilales:f_:g_                                                  | 0.0% | 0.0% | 0.0% | 0.0% | 0.0% | 0.0% | 0.0% |
| k_Bacteria:p_Verrucomicrobia;c_[Methylacidiphilae];o_Methylacidiphilales:f_LD19:g_                                              | 0.0% | 0.0% | 0.0% | 0.0% | 0.0% | 0.0% | 0.0% |
| k_Bacteria:p_Verrucomicrobia;c_[Methylacidiphilae];o_S-BQ2-57:f_:g_                                                             | 0.0% | 0.0% | 0.0% | 0.1% | 0.0% | 0.0% | 0.0% |
| k_Bacteria:p_Verrucomicrobia;c_[Pedosphaerae];o_[Pedosphaerales];Other;Other                                                    | 0.0% | 0.0% | 0.0% | 0.0% | 0.0% | 0.0% | 0.0% |
| k_Bacteria:p_Verrucomicrobia;c_[Pedosphaerae];o_[Pedosphaerales]:f_:g_                                                          | 0.3% | 0.2% | 0.1% | 0.5% | 0.0% | 0.1% | 0.6% |
| k_Bacteria:p_Verrucomicrobia;c_[Pedosphaerae];o_[Pedosphaerales]:f_Ellin515:g_                                                  | 0.1% | 0.0% | 0.0% | 0.2% | 0.0% | 0.0% | 0.4% |
| k_Bacteria:p_Verrucomicrobia;c_[Pedosphaerae];o_[Pedosphaerales]:f_Ellin517:g_                                                  | 0.1% | 0.2% | 0.4% | 0.1% | 0.0% | 0.0% | 0.1% |
| k_Bacteria:p_Verrucomicrobia;c_[Pedosphaerae];o_[Pedosphaerales]:f_OPB35:g_                                                     | 0.1% | 0.0% | 0.2% | 0.0% | 0.0% | 0.1% | 0.1% |
| k_Bacteria:p_Verrucomicrobia;c_[Pedosphaerae];o_[Pedosphaerales]:f_R4-41B:g_                                                    | 0.0% | 0.0% | 0.0% | 0.0% | 0.0% | 0.0% | 0.0% |
| k_Bacteria:p_Verrucomicrobia;c_[Pedosphaerae];o_[Pedosphaerales]:f_[Pedosphaeraceae];Other                                      | 0.0% | 0.0% | 0.0% | 0.0% | 0.0% | 0.0% | 0.0% |
| k_Bacteria:p_Verrucomicrobia;c_[Pedosphaerae];o_[Pedosphaerales]:f_[Pedosphaeraceae]:g_                                         | 0.0% | 0.0% | 0.0% | 0.0% | 0.0% | 0.0% | 0.0% |
| k_Bacteria:p_Verrucomicrobia;c_[Pedosphaerae];o_[Pedosphaerales]:f_[Pedosphaeraceae]:g_Pedosphaera                              | 0.0% | 0.0% | 0.0% | 0.0% | 0.0% | 0.0% | 0.0% |
| k_Bacteria:p_Verrucomicrobia;c_[Pedosphaerae];o_[Pedosphaerales]:f_auto67_4W:g_                                                 | 0.1% | 0.1% | 0.0% | 0.3% | 0.0% | 0.0% | 0.1% |
| k_Bacteria:p_Verrucomicrobia;c_[Spartobacteria];o_[Chthoniobacteriales]:f_01D2Z36:g_                                            | 0.0% | 0.0% | 0.0% | 0.0% | 0.0% | 0.0% | 0.0% |
| k_Bacteria:p_Verrucomicrobia;c_[Spartobacteria];o_[Chthoniobacteriales]:f_[Chthoniobacteraceae];Other                           | 0.0% | 0.0% | 0.0% | 0.0% | 0.0% | 0.0% | 0.0% |
| k_Bacteria:p_Verrucomicrobia;c_[Spartobacteria];o_[Chthoniobacteriales]:f_[Chthoniobacteraceae]:g_                              | 0.1% | 0.1% | 0.1% | 0.2% | 0.0% | 0.0% | 0.2% |
| k_Bacteria:p_Verrucomicrobia;c_[Spartobacteria];o_[Chthoniobacteriales]:f_[Chthoniobacteraceae]:g_Candidatus Xiphinema tobacter | 0.4% | 0.1% | 0.0% | 0.3% | 0.5% | 0.2% | 1.1% |
| k_Bacteria:p_Verrucomicrobia;c_[Spartobacteria];o_[Chthoniobacteriales]:f_[Chthoniobacteraceae]:g_Chthoniobacter                | 0.0% | 0.0% | 0.0% | 0.1% | 0.0% | 0.0% | 0.0% |
| k_Bacteria:p_Verrucomicrobia;c_[Spartobacteria];o_[Chthoniobacteriales]:f_[Chthoniobacteraceae]:g_DA101                         | 0.4% | 0.0% | 0.0% | 1.0% | 0.1% | 0.0% | 1.0% |
| k_Bacteria:p_Verrucomicrobia;c_[Spartobacteria];o_[Chthoniobacteriales]:f_[Chthoniobacteraceae]:g_Ellin506                      | 0.0% | 0.0% | 0.0% | 0.0% | 0.0% | 0.0% | 0.0% |
| k_Bacteria:p_Verrucomicrobia;c_[Spartobacteria];o_[Chthoniobacteriales]:f_[Chthoniobacteraceae]:g_OR-59                         | 0.0% | 0.0% | 0.0% | 0.0% | 0.0% | 0.0% | 0.0% |
| k_Bacteria:p_Verrucomicrobia;c_[Spartobacteria];o_[Chthoniobacteriales]:f_[Chthoniobacteraceae]:g_heteroC45_4W                  | 0.0% | 0.0% | 0.0% | 0.0% | 0.0% | 0.0% | 0.0% |
| k_Bacteria:p_WPS-2;c_:o_:f_:g_                                                                                                  | 0.3% | 0.0% | 0.0% | 0.0% | 1.6% | 0.0% | 0.0% |
| k_Bacteria:p_WS2;c_Kazan-3B-09;o_:f_:g_                                                                                         | 0.0% | 0.0% | 0.0% | 0.0% | 0.0% | 0.0% | 0.0% |
| k_Bacteria:p_WS2;c_SHA-109;o_:f_:g_                                                                                             | 0.0% | 0.0% | 0.0% | 0.0% | 0.0% | 0.0% | 0.0% |
| k_Bacteria:p_WS3;c_PRR-12;o_:f_:g_                                                                                              | 0.0% | 0.0% | 0.0% | 0.0% | 0.0% | 0.0% | 0.0% |
| k_Bacteria:p_WS3;c_PRR-12;o_LD1-PA13:f_:g_                                                                                      | 0.0% | 0.0% | 0.0% | 0.0% | 0.0% | 0.0% | 0.1% |
| k_Bacteria:p_WS3;c_PRR-12;o_PBS-III-9:f_:g_                                                                                     | 0.0% | 0.0% | 0.0% | 0.0% | 0.0% | 0.0% | 0.0% |
| k_Bacteria:p_WS3;c_PRR-12;o_Sediment-1;Other;Other                                                                              | 0.0% | 0.0% | 0.0% | 0.0% | 0.0% | 0.0% | 0.0% |
| k_Bacteria:p_WS3;c_PRR-12;o_Sediment-1:f_:g_                                                                                    | 0.1% | 0.0% | 0.2% | 0.1% | 0.0% | 0.3% | 0.2% |
| k_Bacteria:p_WS3;c_PRR-12;o_Sediment-1:f_CV106:g_                                                                               | 0.0% | 0.0% | 0.0% | 0.0% | 0.0% | 0.0% | 0.0% |
| k_Bacteria:p_WS3;c_PRR-12;o_Sediment-1:f_PRR-10:g_                                                                              | 0.1% | 0.0% | 0.2% | 0.2% | 0.0% | 0.4% | 0.2% |
| k_Bacteria:p_WS3;c_PRR-12;o_wb1_H11:f_:g_                                                                                       | 0.0% | 0.0% | 0.0% | 0.0% | 0.0% | 0.0% | 0.0% |
| k_Bacteria:p_WS4;c_:o_:f_:g_                                                                                                    | 0.0% | 0.0% | 0.0% | 0.0% | 0.0% | 0.0% | 0.0% |
| k_Bacteria:p_WS5;c_:o_:f_:g_                                                                                                    | 0.0% | 0.0% | 0.0% | 0.0% | 0.0% | 0.0% | 0.0% |
| k_Bacteria:p_WS6;c_:o_:f_:g_                                                                                                    | 0.0% | 0.0% | 0.0% | 0.0% | 0.0% | 0.0% | 0.0% |
| k_Bacteria:p_WS6;c_B142;o_:f_:g_                                                                                                | 0.0% | 0.0% | 0.0% | 0.0% | 0.0% | 0.0% | 0.0% |
| k_Bacteria:p_WS6;c_SC72;o_:f_:g_                                                                                                | 0.0% | 0.0% | 0.0% | 0.0% | 0.0% | 0.0% | 0.0% |
| k_Bacteria:p_ZB3;c_:o_:f_:g_                                                                                                    | 0.0% | 0.0% | 0.0% | 0.0% | 0.0% | 0.0% | 0.0% |
| k_Bacteria:p_ZB3;c_BS119;o_:f_:g_                                                                                               | 0.0% | 0.0% | 0.0% | 0.0% | 0.0% | 0.0% | 0.0% |
| k_Bacteria:p_[Caldithrix];c_KSB1;o_Ucn15732:f_:g_                                                                               | 0.0% | 0.0% | 0.0% | 0.0% | 0.0% | 0.0% | 0.0% |
| k_Bacteria:p_[Thermi];c_Deinococci;o_Deinococcales:f_Deinococcaceae:g_Deinococcus                                               | 0.0% | 0.0% | 0.0% | 0.0% | 0.0% | 0.0% | 0.0% |
| k_Bacteria:p_[Thermi];c_Deinococci;o_Deinococcales:f_Deinococcaceae:g_R18-435                                                   | 0.0% | 0.0% | 0.0% | 0.0% | 0.0% | 0.0% | 0.0% |
| k_Bacteria:p_[Thermi];c_Deinococci;o_Deinococcales:f_Trueperaceae:g_                                                            | 0.0% | 0.0% | 0.0% | 0.0% | 0.0% | 0.0% | 0.0% |
| k_Bacteria:p_[Thermi];c_Deinococci;o_Deinococcales:f_Trueperaceae:g_B-42                                                        | 0.0% | 0.0% | 0.0% | 0.0% | 0.0% | 0.0% | 0.0% |
| k_Bacteria:p_[Thermi];c_Deinococci;o_Deinococcales:f_Trueperaceae:g_Truepera                                                    | 0.0% | 0.0% | 0.0% | 0.0% | 0.0% | 0.0% | 0.0% |
